# Supplementary material for: Direct arylation of N-heterocycles enabled by photoredox catalysis
Source: Royal Society of Chemistry journal article supplement (doi:10.1039/d2cc01212j), 2022-01-01
Supplement: d2cc01212j1.pdf [file d2cc01212j1.pdf]

## *Supporting Information*

### **Direct Arylation of *N*-heterocycles Enabled by Photoredox Catalysis**

Heng-Hui Li,<sup>a,b</sup> Shaoyu Li,<sup>b</sup> Jun Kee Cheng,<sup>\*b</sup> Shao-Hua Xiang,<sup>b</sup> and Bin Tan<sup>\*b</sup>

<sup>a</sup>*School of Chemistry and Chemical Engineering, Harbin Institute of Technology, Harbin 150001, China*

<sup>b</sup>*Shenzhen Grubbs Institute, Department of Chemistry and Guangdong Provincial Key Laboratory of Catalysis, Southern University of Science and Technology, Shenzhen, 518055, China*

E-mail: [tanb@sustech.edu.cn](mailto:tanb@sustech.edu.cn); [junkee@sustech.edu.cn](mailto:junkee@sustech.edu.cn)

## Content

|                                                                                 |    |
|---------------------------------------------------------------------------------|----|
| General Information.....                                                        | 2  |
| Reaction Condition Optimization .....                                           | 3  |
| General Procedure for Photocatalytic Synthesis of <i>N</i> -Heterobiaryls ..... | 6  |
| Characterization of Products.....                                               | 7  |
| Crystallographic Data .....                                                     | 25 |
| Gram-Scale Synthesis .....                                                      | 26 |
| Mechanistic Investigations.....                                                 | 27 |
| Copies of <sup>1</sup> H, <sup>13</sup> C and <sup>19</sup> F NMR Spectra.....  | 30 |

## General Information

Unless otherwise specified, chemicals were purchased from commercial suppliers and used without further purification. Analytical thin layer chromatography (TLC) was performed on Jiangyou TLC silica gel plates HSGF254 and visualized through UV light (254 nm). Preparative thin layer chromatography (PTLC) was performed using Huanghai (0.4-0.5 mm, 20\*20 cm, Yantai Jiangyou). Flash column chromatography was performed using Tsingtao Haiyang silica gel (200-300 mesh).  $^1\text{H}$  and  $^{13}\text{C}$  NMR spectra were recorded on Bruker AVANCE III HD 400 MHz spectrometer. Chemical shifts are expressed in parts per million ( $\delta$ ) referenced to TMS (0.0 ppm),  $\text{CDCl}_3$  (7.26 ppm or 77.16 ppm), Acetone- $d_6$  (2.05 ppm or 29.84 ppm) and DMSO- $d_6$  (2.50 ppm or 39.52 ppm), respectively. The NMR data are recorded as follows: chemical shift ( $\delta$ , ppm), multiplicity (s = singlet; d = doublet; t = triplet; q = quartet; dd = doublet of doublet; m = multiplet; br = broad), coupling constant (Hz), integration. For reaction optimization, triphenylmethane was added as an internal standard (s, 5.55 ppm, 1H) and  $\text{CDCl}_3$  was used as locking solvent. Photochemical reactions were carried out with 24 W blue LED which was purchased from Guangzhou Hongye Lighting (<https://shop111029161.taobao.com/?spm=a230r.7195193.1997079397.2.438a6ac2NnYsKB>). High resolution mass spectroscopy (HRMS) analyses were performed at a Q-Exactive (Thermo Scientific) Inc. mass instrument (HESI).

## Reaction Condition Optimization

**Table S1.** Screening of photocatalysts

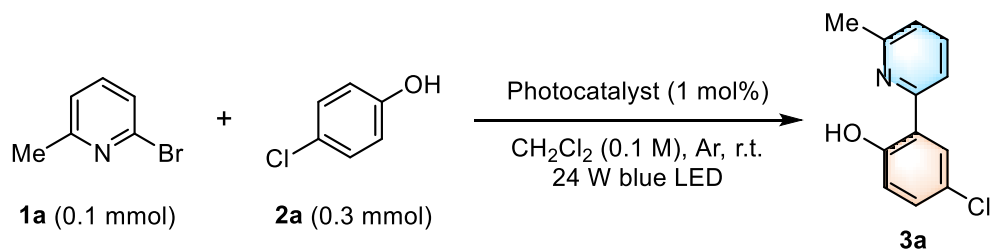

| Entry | Photocatalyst                                                    | Yield (%) <sup>[a]</sup> |
|-------|------------------------------------------------------------------|--------------------------|
| 1     | Ir(ppy) <sub>2</sub> (dtbbpy)PF <sub>6</sub>                     | 81                       |
| 2     | Ir[dF(Me)ppy] <sub>2</sub> (dtbbpy)PF <sub>6</sub>               | 58                       |
| 3     | Ir[dF(CF <sub>3</sub> )ppy] <sub>2</sub> (bpy)PF <sub>6</sub>    | 70 <sup>[b]</sup>        |
| 4     | Ir[dF(CF <sub>3</sub> )ppy] <sub>2</sub> (dtbbpy)PF <sub>6</sub> | 79                       |
| 5     | 4-CzIPN                                                          | 70                       |
| 6     | 3DPAFIPN                                                         | 61                       |
| 7     | 10-Phenyl-10 <i>H</i> -phenothiazine                             | 68                       |
| 8     | Ru(bpy) <sub>3</sub> Cl <sub>2</sub> ·6H <sub>2</sub> O          | N.R.                     |
| 9     | Ru(phen) <sub>3</sub> (PF <sub>6</sub> ) <sub>2</sub>            | N.R.                     |
| 10    | Eosin B                                                          | N.R.                     |
| 11    | Rhodamine B                                                      | N.R.                     |
| 12    | Rhodamine 6G                                                     | N.R.                     |

[a] **1a** (0.1 mmol, 1 equiv), **2a** (3 equiv), photocatalyst (0.01 equiv), CH<sub>2</sub>Cl<sub>2</sub> (1 mL) for 12 h. Yields were determined through crude <sup>1</sup>H NMR spectrum using triphenylmethane as internal standard. [b] The reaction was carried out for 24 h. 3DPAFIPN = 2,4,6-tris(diphenylamino)-5-fluoroisophthalonitrile. N.R. = no reaction.

**Table S2.** Screening of solvents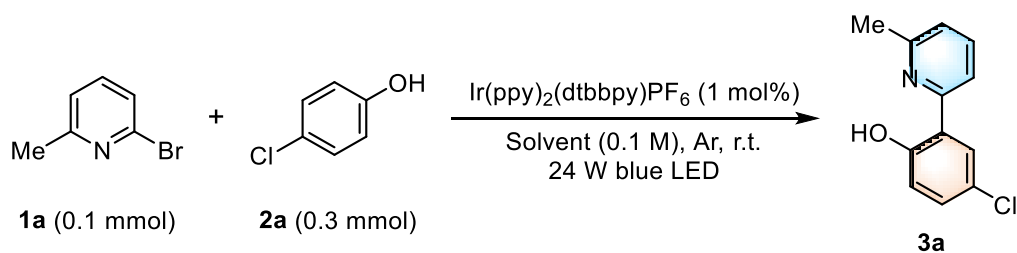

| Entry | Solvent                           | Yield (%) <sup>[a]</sup> |
|-------|-----------------------------------|--------------------------|
| 1     | $\text{CH}_2\text{Cl}_2$          | 81                       |
| 2     | DCE                               | 83                       |
| 3     | $\text{CHCl}_3$                   | 69                       |
| 4     | Hexafluoroisopropanol             | 52                       |
| 5     | $\text{CF}_3\text{CH}_2\text{OH}$ | 58                       |
| 6     | Acetone                           | trace                    |
| 7     | 1,4-dioxane                       | N.R.                     |
| 8     | THF                               | N.R.                     |
| 9     | MeCN                              | 7                        |
| 10    | Toluene                           | 17                       |
| 11    | PhF                               | trace                    |
| 12    | Ethyl acetate                     | N.R.                     |
| 13    | MeOH                              | N.R.                     |

[a] **1a** (0.1 mmol, 1 equiv), **2a** (3 equiv),  $\text{Ir}(\text{ppy})_2(\text{dtbbpy})\text{PF}_6$  (0.01 equiv), solvent (1 mL) for 12 h. Yields were determined through crude  $^1\text{H}$  NMR spectrum using triphenylmethane as internal standard.

**Table S3.** Control Experiments

Reaction scheme showing the synthesis of **3a** from **1a** and **2a**. **1a** (0.1 mmol) reacts with **2a** (0.3 mmol) in the presence of  $\text{Ir(ppy)}_2(\text{dtbbpy})\text{PF}_6$  (1 mol%), DCE (0.1 M), Ar, r.t., and 24 W blue LED to yield **3a**.

| Entry | Variations from the above conditions            | Yield (%) <sup>[a]</sup> |
|-------|-------------------------------------------------|--------------------------|
| 1     | —                                               | 83 (83) <sup>[b]</sup>   |
| 2     | No $\text{Ir(ppy)}_2(\text{dtbbpy})\text{PF}_6$ | N.R.                     |
| 3     | No light                                        | N.R.                     |
| 4     | <b>2a</b> (0.2 mmol)                            | 71 <sup>[c]</sup>        |

[a] **1a** (0.1 mmol, 1 equiv), **2a** (3 equiv),  $\text{Ir(ppy)}_2(\text{dtbbpy})\text{PF}_6$  (0.01 equiv), DCE (1 mL) for 12 h. Yields were determined through crude  $^1\text{H}$  NMR spectrum using triphenylmethane as internal standard. [b] Yield in the parentheses was isolated yield. [c] Isolated by PTLC.

## General Procedure for Photocatalytic Synthesis of *N*-Heterobiaryls

To an oven-dried Schlenk tube equipped with magnetic bar was added phenol or arene (if it's solid, 0.6 mmol, 3 equiv), Ir(ppy)<sub>2</sub>(dtbbpy)PF<sub>6</sub> (0.01 equiv), bromoazaarenes (if it's solid, 0.2 mmol, 1 equiv). The mixture was then placed under vacuum and backfilled with argon three times, followed by the addition of DCE (2 mL) and arene or bromoazaarene (if it's liquid). Then the tube was placed approximate 4~5 cm away from 24 W blue LED and stir vigorously for corresponding time with a cooling fan to maintain the reaction at r.t. (about 25 °C). Upon completion of the reaction monitored by TLC, the mixture was concentrated and purified by silica chromatography or PTLC to afford the pure product.

## Characterization of Products

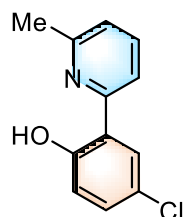

### 4-Chloro-2-(6-methylpyridin-2-yl)phenol (**3a**)

Following the general procedure, **3a** was obtained in 83% yield as a yellow solid.

$^1\text{H}$  NMR (400 MHz, DMSO- $d_6$ )  $\delta$  14.55 (s, 1H), 8.10 – 8.05 (m, 2H), 7.94 – 7.90 (m, 1H), 7.35 – 7.30 (m, 2H), 6.93 (d,  $J$  = 8.8 Hz, 1H), 2.56 (s, 3H).

$^{13}\text{C}$  NMR (100 MHz, DMSO- $d_6$ )  $\delta$  158.05, 155.04, 154.94, 139.04, 130.80, 126.29, 122.47, 120.16, 119.70, 117.37, 23.34.

HRMS (ESI)  $[\text{M}+\text{H}]^+$  calculated  $m/z$  for  $[\text{C}_{12}\text{H}_{11}\text{ClNO}]^+$ : 220.0524, found: 220.0522.

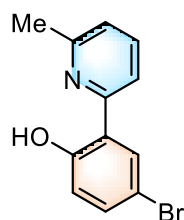

### 4-Bromo-2-(6-methylpyridin-2-yl)phenol (**3b**)

Following the general procedure, **3b** was obtained in 83% yield as a yellow solid.

$^1\text{H}$  NMR (400 MHz, DMSO- $d_6$ )  $\delta$  14.57 (s, 1H), 8.15 (d,  $J$  = 2.5 Hz, 1H), 8.07 (d,  $J$  = 8.2 Hz, 1H), 7.92 – 7.88 (m, 1H), 7.42 (dd,  $J$  = 8.8, 2.5 Hz, 1H), 7.32 (d,  $J$  = 7.6 Hz, 1H), 6.87 (d,  $J$  = 8.8 Hz, 1H), 2.55 (s, 3H).

$^{13}\text{C}$  NMR (100 MHz, DMSO- $d_6$ )  $\delta$  158.46, 155.00, 154.81, 138.99, 133.61, 129.09, 122.44, 120.77, 120.14, 117.36, 109.97, 23.33.

HRMS (ESI)  $[\text{M}+\text{H}]^+$  calculated  $m/z$  for  $[\text{C}_{12}\text{H}_{11}\text{BrNO}]^+$ : 264.0019, found: 264.0017.



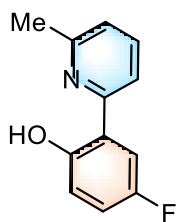

#### 4-Fluoro-2-(6-methylpyridin-2-yl)phenol (**3c**)

Following the general procedure, **3c** was obtained in 72% yield as a yellow solid.

$^1\text{H}$  NMR (400 MHz,  $\text{DMSO-}d_6$ )  $\delta$  14.25 (s, 1H), 8.05 (d,  $J = 8.2$  Hz, 1H), 7.94 – 7.85 (m, 2H), 7.33 (d,  $J = 7.6$  Hz, 1H), 7.17 – 7.12 (m, 1H), 6.93 – 6.89 (m, 1H), 2.56 (s, 3H).

$^{13}\text{C}$  NMR (100 MHz,  $\text{DMSO-}d_6$ )  $\delta$  155.52, 155.27 (d,  $J = 2.8$  Hz), 155.13 (d,  $J = 233.0$  Hz), 155.05, 139.02, 122.38, 119.14 (d,  $J = 7.4$  Hz), 119.01 (d,  $J = 8.0$  Hz), 118.04 (d,  $J = 23.2$  Hz), 117.36, 112.68 (d,  $J = 24.3$  Hz).

$^{19}\text{F}$  NMR (376 MHz,  $\text{DMSO-}d_6$ )  $\delta$  -125.79.

HRMS (ESI)  $[\text{M}+\text{H}]^+$  calculated  $m/z$  for  $[\text{C}_{12}\text{H}_{11}\text{FNO}]^+$ : 204.0819, found: 204.0818.

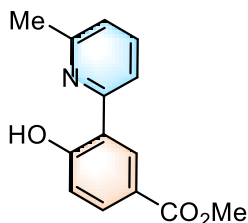

#### Methyl 4-hydroxy-3-(6-methylpyridin-2-yl)benzoate (**3d**)

Following the general procedure, **3d** was obtained in 75% yield as a yellow solid.

$^1\text{H}$  NMR (400 MHz,  $\text{DMSO-}d_6$ )  $\delta$  15.32 (s, 1H), 8.53 (d,  $J = 2.2$  Hz, 1H), 8.06 (d,  $J = 8.2$  Hz, 1H), 8.00 – 7.91 (m, 1H), 7.88 (dd,  $J = 8.6, 2.2$  Hz, 1H), 7.36 (d,  $J = 7.7$  Hz, 1H), 7.00 (d,  $J = 8.6$  Hz, 1H), 3.84 (s, 3H), 2.57 (s, 3H).

$^{13}\text{C}$  NMR (100 MHz,  $\text{DMSO-}d_6$ )  $\delta$  165.88, 163.61, 155.07, 154.99, 139.30, 132.15, 128.56, 122.55, 120.15, 118.53, 118.35, 117.14, 51.90, 23.29.

HRMS (ESI)  $[\text{M}+\text{H}]^+$  calculated  $m/z$  for  $[\text{C}_{14}\text{H}_{14}\text{NO}_3]^+$ : 244.0968, found: 244.0966.

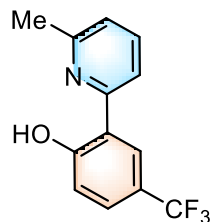

### 2-(6-Methylpyridin-2-yl)-4-(trifluoromethyl)phenol (**3e**)

Following the general procedure, **3e** was obtained in 76% yield as a yellow solid.

$^1\text{H}$  NMR (400 MHz, DMSO- $d_6$ )  $\delta$  15.21 (s, 1H), 8.30 (d,  $J = 2.2$  Hz, 1H), 8.19 – 8.16 (m, 1H), 7.95 – 7.91 (m, 1H), 7.60 (dd,  $J = 8.6, 2.2$  Hz, 1H), 7.35 (d,  $J = 7.6$  Hz, 1H), 7.06 (d,  $J = 8.6$  Hz, 1H), 2.56 (s, 3H).

$^{13}\text{C}$  NMR (100 MHz, DMSO- $d_6$ )  $\delta$  162.34, 154.98, 154.79, 139.15, 127.76 (q,  $J = 3.7$  Hz), 124.62 (q,  $J = 271.0$  Hz), 124.37 (q,  $J = 3.9$  Hz), 119.44 (q,  $J = 32.2$  Hz), 118.94, 118.75, 117.50, 23.26.

$^{19}\text{F}$  NMR (376 MHz, DMSO- $d_6$ )  $\delta$  -59.58.

HRMS (ESI)  $[\text{M}+\text{H}]^+$  calculated  $m/z$  for  $[\text{C}_{13}\text{H}_{11}\text{F}_3\text{NO}]^+$ : 254.0787, found: 254.0785.

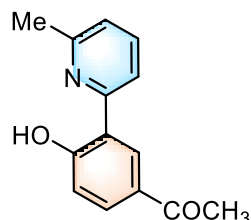

### 1-(4-Hydroxy-3-(6-methylpyridin-2-yl)phenyl)ethan-1-one (**3f**)

Following the general procedure, **3f** was obtained in 63% yield as a yellow solid.

$^1\text{H}$  NMR (400 MHz, DMSO- $d_6$ )  $\delta$  15.47 (s, 1H), 8.55 (d,  $J = 2.2$  Hz, 1H), 8.17 (d,  $J = 8.2$  Hz, 1H), 7.98 – 7.94 (m, 1H), 7.90 (dd,  $J = 8.6, 2.2$  Hz, 1H), 7.36 (d,  $J = 7.6$  Hz, 1H), 6.99 (d,  $J = 8.6$  Hz, 1H), 2.59 (s, 3H), 2.57 (s, 3H)

$^{13}\text{C}$  NMR (100 MHz, DMSO- $d_6$ )  $\delta$  196.20, 163.79, 155.39, 154.83, 139.24, 131.37, 128.28, 128.01, 122.48, 118.19, 118.05, 117.18, 26.46, 23.26.

HRMS (ESI)  $[\text{M}+\text{H}]^+$  calculated  $m/z$  for  $[\text{C}_{14}\text{H}_{14}\text{NO}_2]^+$ : 228.1019, found: 228.1016.

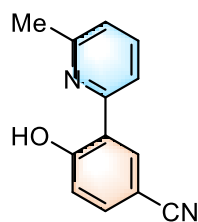

#### 4-Hydroxy-3-(6-methylpyridin-2-yl)benzonitrile (**3g**)

Following the general procedure, **3g** was obtained in 70% yield as yellow solid.

$^1\text{H}$  NMR (400 MHz, DMSO- $d_6$ )  $\delta$  15.71 (s, 1H), 8.56 (s, 1H), 8.19 (d,  $J$  = 8.2 Hz, 1H), 7.99 – 7.95 (m, 1H), 7.71 (d,  $J$  = 8.5 Hz, 1H), 7.39 (d,  $J$  = 7.6 Hz, 1H), 7.04 (d,  $J$  = 8.6 Hz, 1H), 2.57 (s, 3H).

$^{13}\text{C}$  NMR (100 MHz, DMSO- $d_6$ )  $\delta$  163.42, 154.90, 154.43, 139.37, 134.65, 131.94, 122.98, 119.48, 119.33, 117.51, 101.04, 23.20.

HRMS (ESI)  $[\text{M}+\text{H}]^+$  calculated  $m/z$  for  $[\text{C}_{13}\text{H}_{11}\text{N}_2\text{O}]^+$ : 211.0866, found: 211.0864.

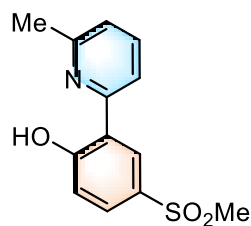

#### 2-(6-Methylpyridin-2-yl)-4-(methylsulfonyl)phenol (**3h**)

Following the general procedure, **3h** was obtained in 69% yield as a yellow solid.

$^1\text{H}$  NMR (400 MHz, DMSO- $d_6$ )  $\delta$  15.44 (s, 1H), 8.49 (d,  $J$  = 2.3 Hz, 1H), 8.18 – 8.16 (m, 1H), 8.02 – 7.98 (m, 1H), 7.81 (dd,  $J$  = 8.7, 2.3 Hz, 1H), 7.42 – 7.40 (m, 1H), 7.12 (d,  $J$  = 8.6 Hz, 1H), 3.24 (s, 3H), 2.59 (s, 3H).

$^{13}\text{C}$  NMR (100 MHz, DMSO- $d_6$ )  $\delta$  163.40, 155.13, 154.55, 139.34, 130.94, 129.79, 126.77, 122.97, 118.99, 118.67, 117.62, 43.90, 23.29.

HRMS (ESI)  $[\text{M}+\text{H}]^+$  calculated  $m/z$  for  $[\text{C}_{13}\text{H}_{14}\text{NO}_3\text{S}]^+$ : 264.0689, found: 264.0687.

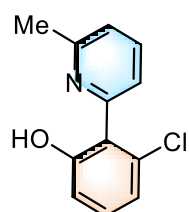

### 3-Chloro-2-(6-methylpyridin-2-yl)phenol (**3i**)

Following the general procedure, **3i** was obtained in 57% yield as a yellow solid.

$^1\text{H}$  NMR (400 MHz, DMSO- $d_6$ )  $\delta$  15.01 (s, 1H), 8.04 – 8.00 (m, 2H), 7.94 – 7.90 (m, 1H), 7.32 (d,  $J$  = 7.5 Hz, 1H), 6.97 – 6.82 (m, 2H), 2.55 (s, 3H).

$^{13}\text{C}$  NMR (100 MHz, DMSO- $d_6$ )  $\delta$  160.36, 155.37, 154.87, 139.12, 135.11, 128.47, 122.24, 118.78, 117.67, 117.46, 117.00, 23.29.

HRMS (ESI)  $[\text{M}+\text{H}]^+$  calculated  $m/z$  for  $[\text{C}_{12}\text{H}_{11}\text{ClNO}]^+$ : 220.0524, found: 220.0521.

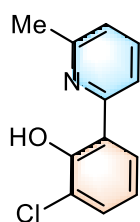

### 2-Chloro-6-(6-methylpyridin-2-yl)phenol (**3j**)

Following the general procedure, **3j** was obtained in 61% yield as a yellow solid.

$^1\text{H}$  NMR (400 MHz, DMSO- $d_6$ )  $\delta$  15.89 (s, 1H), 8.07 (d,  $J$  = 8.2 Hz, 1H), 8.02 – 7.94 (m, 2H), 7.47 – 7.45 (m, 1H), 7.36 (d,  $J$  = 7.6 Hz, 1H), 6.90 (t,  $J$  = 7.9 Hz, 1H), 2.58 (s, 3H).

$^{13}\text{C}$  NMR (100 MHz, DMSO- $d_6$ )  $\delta$  155.46, 155.44, 154.67, 139.41, 131.26, 125.54, 122.55, 121.47, 119.59, 118.83, 117.07, 23.13.

HRMS (ESI)  $[\text{M}+\text{H}]^+$  calculated  $m/z$  for  $[\text{C}_{12}\text{H}_{11}\text{ClNO}]^+$ : 220.0524, found: 220.0522.

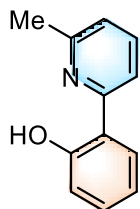

### 2-(6-Methylpyridin-2-yl)phenol (**3k**)

Following the general procedure, **3k** was obtained in 76% yield as a yellow solid.

$^1\text{H}$  NMR (400 MHz,  $\text{CDCl}_3$ )  $\delta$  14.80 (s, 1H), 7.78 – 7.76 (m, 1H), 7.69 – 7.58 (m, 2H), 7.31 – 7.26 (m, 1H), 7.07 – 7.00 (m, 2H), 6.90 – 6.86 (m, 1H), 2.58 (s, 3H).

$^{13}\text{C}$  NMR (100 MHz,  $\text{CDCl}_3$ )  $\delta$  160.23, 157.32, 155.07, 138.12, 131.38, 126.26, 121.23, 118.92, 118.74, 118.63, 116.08, 23.90.

HRMS (ESI)  $[\text{M}+\text{H}]^+$  calculated  $m/z$  for  $[\text{C}_{12}\text{H}_{12}\text{NO}]^+$ : 186.0913, found: 186.0912.

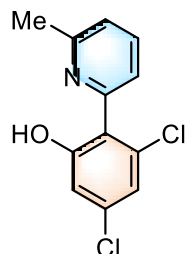

### 3,5-Dichloro-2-(6-methylpyridin-2-yl)phenol (**3l**)

Following the general procedure, **3l** was obtained in 73% yield as a yellow solid.

$^1\text{H}$  NMR (400 MHz,  $\text{DMSO}-d_6$ )  $\delta$  13.43 (s, 1H), 8.05 (d,  $J = 8.2$  Hz, 1H), 7.80 – 7.76 (m, 1H), 7.19 (d,  $J = 7.7$  Hz, 1H), 7.03 (d,  $J = 2.2$  Hz, 1H), 6.98 (d,  $J = 2.2$  Hz, 1H), 2.64 (s, 3H).

$^{13}\text{C}$  NMR (100 MHz,  $\text{DMSO}-d_6$ )  $\delta$  160.04, 155.70, 153.64, 137.67, 135.28, 132.81, 123.07, 122.26, 121.79, 118.50, 116.92, 23.86.

HRMS (ESI)  $[\text{M}+\text{H}]^+$  calculated  $m/z$  for  $[\text{C}_{12}\text{H}_{10}\text{Cl}_2\text{NO}]^+$ : 254.0134, found: 254.0132.

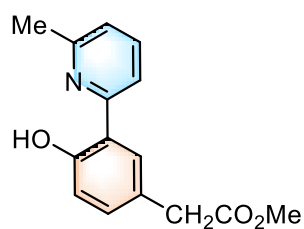

### Methyl 2-(4-hydroxy-3-(6-methylpyridin-2-yl)phenyl)acetate (**3m**)

Following the general procedure, **3m** was obtained in 78% yield as a yellow solid.

$^1\text{H}$  NMR (400 MHz,  $\text{DMSO}-d_6$ )  $\delta$  14.39 (s, 1H), 7.98 – 7.89 (m, 3H), 7.29 (d,  $J = 7.5$  Hz, 1H), 7.19 (dd,  $J = 8.3, 2.2$  Hz, 1H), 6.87 (d,  $J = 8.3$  Hz, 1H), 3.66 (s, 2H), 3.62 (s, 3H), 2.55 (s, 3H).

$^{13}\text{C}$  NMR (100 MHz,  $\text{DMSO}-d_6$ )  $\delta$  172.04, 158.21, 156.21, 154.94, 138.89, 132.32, 127.79, 124.52, 121.81, 118.34, 117.89, 116.69, 51.68, 39.31, 23.42.

HRMS (ESI)  $[\text{M}+\text{H}]^+$  calculated  $m/z$  for  $[\text{C}_{15}\text{H}_{16}\text{NO}_3]^+$ : 258.1125, found: 258.1122

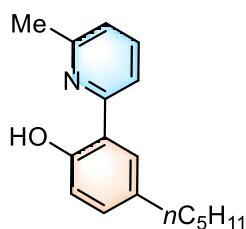

### 2-(6-Methylpyridin-2-yl)-4-pentylphenol (3n)

Following the general procedure, **3n** was obtained in 77% yield as a yellow solid.

$^1\text{H}$  NMR (400 MHz, DMSO- $d_6$ )  $\delta$  14.21 (s, 1H), 8.00 (d,  $J = 8.2$  Hz, 1H), 7.90 – 7.86 (m, 1H), 7.77 (d,  $J = 2.2$  Hz, 1H), 7.26 (d,  $J = 7.6$  Hz, 1H), 7.09 (dd,  $J = 8.3, 2.2$  Hz, 1H), 6.81 (d,  $J = 8.3$  Hz, 1H), 2.55 – 2.50 (m, 5H), 1.60 – 1.52 (m, 2H), 1.31 – 1.14 (m, 4H), 0.85 (t,  $J = 6.9$  Hz, 3H).

$^{13}\text{C}$  NMR (100 MHz, DMSO- $d_6$ )  $\delta$  157.29, 156.55, 154.78, 138.73, 132.38, 131.22, 126.25, 121.53, 118.22, 117.67, 116.69, 34.44, 30.96, 30.91, 23.41, 21.99, 13.93.

HRMS (ESI)  $[\text{M}+\text{H}]^+$  calculated  $m/z$  for  $[\text{C}_{17}\text{H}_{22}\text{NO}]^+$ : 256.1696, found: 256.1692.

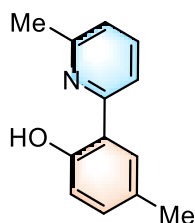

### 4-Methyl-2-(6-methylpyridin-2-yl)phenol (3o)

Following the general procedure, **3o** was obtained in 77% yield as a yellow solid.

$^1\text{H}$  NMR (400 MHz, DMSO- $d_6$ )  $\delta$  14.21 (s, 1H), 7.99 (d,  $J = 8.2$  Hz, 1H), 7.91 – 7.87 (m, 1H), 7.79 (d,  $J = 2.2$  Hz, 1H), 7.27 (d,  $J = 7.6$  Hz, 1H), 7.10 (dd,  $J = 8.3, 2.2$  Hz, 1H), 6.80 (d,  $J = 8.2$  Hz, 1H), 2.54 (s, 3H), 2.28 (s, 3H).

$^{13}\text{C}$  NMR (100 MHz, DMSO- $d_6$ )  $\delta$  157.11, 156.51, 154.87, 138.82, 132.01, 127.23, 126.91, 121.63, 118.26, 117.74, 116.69, 23.45, 20.28.

HRMS (ESI)  $[\text{M}+\text{H}]^+$  calculated  $m/z$  for  $[\text{C}_{13}\text{H}_{14}\text{NO}]^+$ : 200.1070, found: 200.1068.

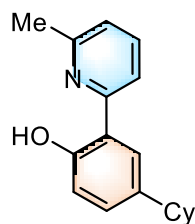

#### 4-Cyclohexyl-2-(6-methylpyridin-2-yl)phenol (**3p**)

Following the general procedure, **3p** was obtained in 68% yield as a yellow solid.

$^1\text{H}$  NMR (400 MHz,  $\text{DMSO-}d_6$ )  $\delta$  14.22 (s, 1H), 8.04 (d,  $J = 8.2$  Hz, 1H), 7.90 – 7.86 (m, 1H), 7.78 (d,  $J = 2.2$  Hz, 1H), 7.27 (d,  $J = 7.6$  Hz, 1H), 7.13 (dd,  $J = 8.4, 2.2$  Hz, 1H), 6.81 (d,  $J = 8.4$  Hz, 1H), 2.54 (s, 3H), 2.48 – 2.44 (m, 1H), 1.80 – 1.76 (m, 4H), 1.47 – 1.20 (m, 6H).

$^{13}\text{C}$  NMR (100 MHz,  $\text{DMSO-}d_6$ )  $\delta$  157.39, 156.63, 154.79, 138.76, 137.88, 129.56, 124.75, 121.57, 118.24, 117.68, 116.78, 43.13, 34.18, 26.49, 25.61, 23.45.

HRMS (ESI)  $[\text{M}+\text{H}]^+$  calculated  $m/z$  for  $[\text{C}_{18}\text{H}_{22}\text{NO}]^+$ : 268.1696, found: 268.1693.

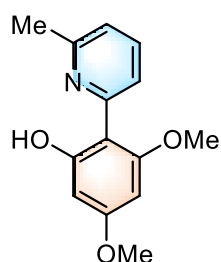

#### 3,5-Dimethoxy-2-(6-methylpyridin-2-yl)phenol (**3q**)

Following the general procedure, **3q** was obtained in 57% yield as a yellow solid.

$^1\text{H}$  NMR (400 MHz,  $\text{CDCl}_3$ )  $\delta$  16.12 (s, 1H), 8.21 – 8.18 (m, 1H), 7.65 – 7.61 (m, 1H), 6.97 (d,  $J = 7.5$  Hz, 1H), 6.20 (s, 1H), 6.05 (s, 1H), 3.87 (s, 3H), 3.82 (s, 3H), 2.55 (s, 3H).

$^{13}\text{C}$  NMR (100 MHz,  $\text{CDCl}_3$ )  $\delta$  163.51, 161.65, 160.31, 155.77, 153.26, 137.65, 121.17, 119.70, 102.72, 94.70, 90.60, 55.46, 55.22, 23.51.

HRMS (ESI)  $[\text{M}+\text{H}]^+$  calculated  $m/z$  for  $[\text{C}_{14}\text{H}_{16}\text{NO}_3]^+$ : 246.1125, found: 246.1122.

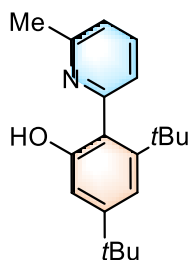

### 3,5-Di-*tert*-butyl-2-(6-methylpyridin-2-yl)phenol (**3r**)

Following the general procedure, **3r** was obtained in 72% yield as a yellow solid.

$^1\text{H}$  NMR (400 MHz,  $\text{CDCl}_3$ )  $\delta$  7.69 – 7.65 (m, 1H), 7.25 – 7.17 (m, 3H), 6.88 (d,  $J$  = 1.8 Hz, 1H), 5.71 (s, 1H), 2.61 (s, 3H), 1.34 (s, 9H), 1.18 (s, 9H).

$^{13}\text{C}$  NMR (100 MHz,  $\text{CDCl}_3$ )  $\delta$  158.48, 157.89, 153.52, 152.05, 148.50, 136.78, 124.40, 124.34, 121.95, 116.91, 111.26, 37.03, 34.92, 32.89, 31.39, 24.54.

HRMS (ESI)  $[\text{M}+\text{H}]^+$  calculated  $m/z$  for  $[\text{C}_{20}\text{H}_{28}\text{NO}]^+$ : 298.2165, found: 298.2161.

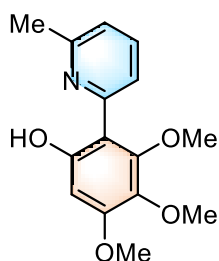

### 3,4,5-Trimethoxy-2-(6-methylpyridin-2-yl)phenol (**3s**)

Following the general procedure, **3s** was obtained in 60% yield as a yellow solid.

$^1\text{H}$  NMR (400 MHz,  $\text{DMSO-}d_6$ )  $\delta$  14.49 (s, 1H), 8.04 (d,  $J$  = 8.4 Hz, 1H), 7.87 – 7.83 (m, 1H), 7.23 (d,  $J$  = 7.6 Hz, 1H), 6.35 (s, 1H), 3.80 (s, 3H), 3.73 (s, 3H), 3.70 (s, 3H), 2.53 (s, 3H).

$^{13}\text{C}$  NMR (100 MHz,  $\text{DMSO-}d_6$ )  $\delta$  156.38, 154.80, 154.65, 154.30, 152.92, 138.65, 134.77, 120.95, 120.64, 106.35, 97.19, 60.66, 55.68, 23.40.

HRMS (ESI)  $[\text{M}+\text{H}]^+$  calculated  $m/z$  for  $[\text{C}_{15}\text{H}_{18}\text{NO}_4]^+$ : 276.1230, found: 276.1228.



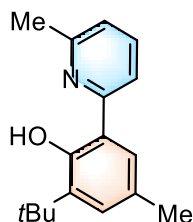

### 2-(*tert*-Butyl)-4-methyl-6-(6-methylpyridin-2-yl)phenol (**3t**)

Following the general procedure, **3t** was obtained in 83% yield as a yellow solid.

$^1\text{H}$  NMR (400 MHz,  $\text{DMSO-}d_6$ )  $\delta$  15.13 (s, 1H), 7.95 (d,  $J = 8.2$  Hz, 1H), 7.87 – 7.83 (m, 1H), 7.63 (d,  $J = 2.0$  Hz, 1H), 7.24 (d,  $J = 7.5$  Hz, 1H), 7.07 (d,  $J = 2.0$  Hz, 1H), 2.54 (s, 3H), 2.27 (s, 3H), 1.40 (s, 9H).

$^{13}\text{C}$  NMR (100 MHz,  $\text{DMSO-}d_6$ )  $\delta$  157.17, 156.47, 154.24, 138.81, 137.01, 129.18, 125.90, 124.81, 121.31, 117.86, 116.96, 34.54, 29.39, 23.30, 20.68.

HRMS (ESI)  $[\text{M}+\text{H}]^+$  calculated  $m/z$  for  $[\text{C}_{17}\text{H}_{22}\text{NO}]^+$ : 256.1696, found: 256.1693.

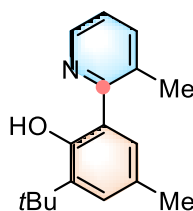

### 2-(*tert*-Butyl)-4-methyl-6-(3-methylpyridin-2-yl)phenol (**4a**)

Following the general procedure, **4a** was obtained in 58% yield as a yellow solid.

$^1\text{H}$  NMR (400 MHz,  $\text{CDCl}_3$ )  $\delta$  8.35 – 8.33 (m, 1H), 7.63 – 7.61 (m, 1H), 7.11 (dd,  $J = 7.7, 4.8$  Hz, 1H), 7.05 (s, 2H), 2.44 (s, 3H), 2.24 (s, 3H), 1.39 (s, 9H).

$^{13}\text{C}$  NMR (101 MHz,  $\text{CDCl}_3$ )  $\delta$  157.33, 153.70, 144.32, 141.27, 138.00, 132.33, 128.64, 128.12, 126.53, 121.80, 35.11, 29.83, 21.59, 21.20.

HRMS (ESI)  $[\text{M}+\text{H}]^+$  calculated  $m/z$  for  $[\text{C}_{17}\text{H}_{22}\text{NO}]^+$ : 256.1696, found: 256.1693.

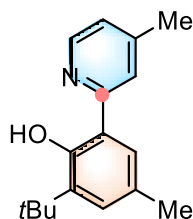

### 2-(*tert*-Butyl)-4-methyl-6-(4-methylpyridin-2-yl)phenol (**4b**)

Following the general procedure, **4b** was obtained in 79% yield as a yellow solid.

$^1\text{H}$  NMR (400 MHz,  $\text{CDCl}_3$ )  $\delta$  14.80 (s, 1H), 8.30 (d,  $J = 5.7$  Hz, 1H), 7.69 (s, 1H), 7.46 (d,  $J = 2.1$  Hz, 1H), 7.14 (d,  $J = 2.1$  Hz, 1H), 7.03 – 6.97 (m, 1H), 2.40 (s, 3H), 2.33 (s, 3H), 1.48 (s, 9H).

$^{13}\text{C}$  NMR (101 MHz,  $\text{CDCl}_3$ )  $\delta$  158.42, 157.24, 148.97, 145.07, 138.22, 129.63, 126.37, 124.55, 122.34, 120.27, 118.48, 35.10, 29.71, 21.75, 21.24.

HRMS (ESI)  $[\text{M}+\text{H}]^+$  calculated  $m/z$  for  $[\text{C}_{17}\text{H}_{22}\text{NO}]^+$ : 256.1696, found: 256.1693.

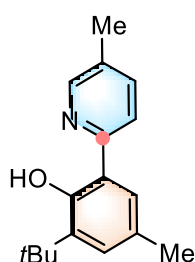

#### 2-(*tert*-Butyl)-4-methyl-6-(5-methylpyridin-2-yl)phenol (**4c**)

Following the general procedure, **4c** was obtained in 66% yield as a yellow solid.

$^1\text{H}$  NMR (400 MHz,  $\text{CDCl}_3$ )  $\delta$  14.50 (s, 1H), 8.28 (s, 1H), 7.79 (d,  $J = 8.4$  Hz, 1H), 7.58 (dd,  $J = 8.4, 2.3$  Hz, 1H), 7.44 (d,  $J = 2.1$  Hz, 1H), 7.12 (d,  $J = 2.2$  Hz, 1H), 2.34 (s, 3H), 2.32 (s, 3H), 1.48 (s, 9H).

$^{13}\text{C}$  NMR (100 MHz,  $\text{CDCl}_3$ )  $\delta$  156.80, 156.03, 145.40, 138.55, 138.14, 130.85, 129.33, 126.41, 124.45, 119.31, 118.57, 35.09, 29.71, 21.24, 18.27.

HRMS (ESI)  $[\text{M}+\text{H}]^+$  calculated  $m/z$  for  $[\text{C}_{17}\text{H}_{22}\text{NO}]^+$ : 256.1696, found: 256.1694.

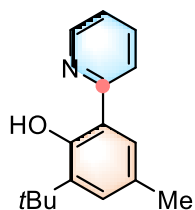

#### 2-(*tert*-Butyl)-4-methyl-6-(pyridin-2-yl)phenol (**4d**)

Following the general procedure, **4d** was obtained in 69% yield as a yellow solid.

$^1\text{H}$  NMR (400 MHz,  $\text{CDCl}_3$ )  $\delta$  14.54 (s, 1H), 8.47 – 8.45 (m, 1H), 7.90 – 7.88 (m, 1H), 7.80 – 7.75 (m, 1H), 7.47 (d,  $J = 2.2$  Hz, 1H), 7.20 – 7.15 (m, 2H), 2.33 (s, 3H), 1.48 (s, 9H).

$^{13}\text{C}$  NMR (100 MHz,  $\text{CDCl}_3$ )  $\delta$  158.75, 157.11, 145.45, 138.31, 137.76, 129.84, 126.53, 124.65, 121.17, 119.77, 118.46, 35.11, 29.70, 21.24.

HRMS (ESI)  $[\text{M}+\text{H}]^+$  calculated  $m/z$  for  $[\text{C}_{16}\text{H}_{20}\text{NO}]^+$ : 242.1539, found: 242.1537.

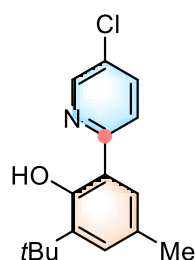

#### **2-(*tert*-Butyl)-6-(5-chloropyridin-2-yl)-4-methylphenol (4e)**

Following the general procedure, **4e** was obtained in 43% yield as a yellow solid.

$^1\text{H}$  NMR (400 MHz,  $\text{CDCl}_3$ )  $\delta$  13.79 (s, 1H), 8.44 (d,  $J = 2.5$  Hz, 1H), 7.84 (d,  $J = 8.9$  Hz, 1H), 7.75 (dd,  $J = 8.9, 2.5$  Hz, 1H), 7.40 (s, 1H), 7.16 (d,  $J = 2.1$  Hz, 1H), 2.32 (s, 3H), 1.46 (s, 9H).

$^{13}\text{C}$  NMR (100 MHz,  $\text{CDCl}_3$ )  $\delta$  156.97, 156.64, 144.51, 138.48, 137.62, 130.27, 129.27, 126.94, 124.74, 120.94, 117.91, 35.15, 29.67, 21.21.

HRMS (ESI)  $[\text{M}+\text{H}]^+$  calculated  $m/z$  for  $[\text{C}_{16}\text{H}_{19}\text{ClNO}]^+$ : 276.1150, found: 276.1146.

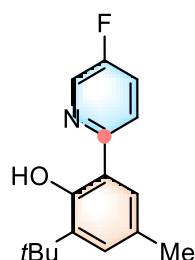

#### **2-(*tert*-Butyl)-6-(5-fluoropyridin-2-yl)-4-methylphenol (4f)**

Following the general procedure, **4f** was obtained in 49% yield as a yellow solid.

$^1\text{H}$  NMR (400 MHz,  $\text{CDCl}_3$ )  $\delta$  13.78 (s, 1H), 8.35 (d,  $J = 3.0$  Hz, 1H), 7.92 – 7.89 (m, 1H), 7.60 – 7.49 (m, 1H), 7.40 (d,  $J = 2.1$  Hz, 1H), 7.15 (s, 1H), 2.33 (s, 3H), 1.47 (s, 9H).

$^{13}\text{C}$  NMR (100 MHz,  $\text{CDCl}_3$ )  $\delta$  157.80 (d,  $J = 254.9$  Hz), 156.13, 155.31 (d,  $J = 3.9$  Hz), 138.42, 133.63 (d,  $J = 25.3$  Hz), 129.83, 126.91, 125.26 (d,  $J = 18.8$  Hz), 124.76, 121.45 (d,  $J = 4.4$  Hz), 118.23, 35.15, 29.68, 21.22.

$^{19}\text{F}$  NMR (376 MHz,  $\text{CDCl}_3$ )  $\delta$  -129.17.

HRMS (ESI)  $[\text{M}+\text{H}]^+$  calculated  $m/z$  for  $[\text{C}_{16}\text{H}_{19}\text{FNO}]^+$ : 260.1445, found: 260.1441.

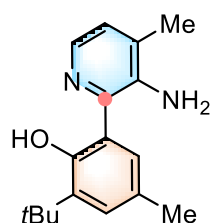

#### 2-(3-Amino-4-methylpyridin-2-yl)-6-(*tert*-butyl)-4-methylphenol (**4g**)

Following the general procedure, **4g** was obtained in 72% yield as a yellow solid.

$^1\text{H}$  NMR (400 MHz,  $\text{CDCl}_3$ )  $\delta$  10.95 (s, 1H), 7.93 (d,  $J = 4.8$  Hz, 1H), 7.42 (s, 1H), 7.10 (d,  $J = 2.2$  Hz, 1H), 6.96 (d,  $J = 4.8$  Hz, 1H), 4.00 (s, 2H), 2.30 (s, 3H), 2.23 (s, 3H), 1.45 (s, 9H).

$^{13}\text{C}$  NMR (100 MHz,  $\text{CDCl}_3$ )  $\delta$  153.55, 142.78, 139.54, 138.45, 137.21, 132.96, 128.35, 127.12, 125.67, 124.28, 120.95, 35.11, 29.77, 21.18, 17.89.

HRMS (ESI)  $[\text{M}+\text{H}]^+$  calculated  $m/z$  for  $[\text{C}_{17}\text{H}_{23}\text{N}_2\text{O}]^+$ : 271.1805, found: 271.1800.

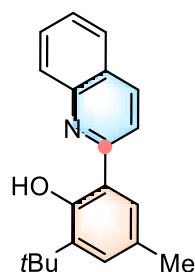

#### 2-(*tert*-Butyl)-6-(quinolin-3-yl)-4-methylphenol (**4h**)

Following the general procedure, **4h** was obtained in 48% yield as a yellow solid.

$^1\text{H}$  NMR (400 MHz,  $\text{DMSO-}d_6$ )  $\delta$  15.63 (s, 1H), 8.55 (d,  $J = 8.9$  Hz, 1H), 8.36 (d,  $J = 9.1$  Hz, 1H), 8.08 – 8.02 (m, 2H), 7.88 – 7.80 (m, 2H), 7.66 – 7.62 (m, 1H), 7.16 (d,  $J = 2.0$  Hz, 1H), 2.32 (s, 3H), 1.45 (s, 9H).

$^{13}\text{C}$  NMR (100 MHz,  $\text{DMSO-}d_6$ )  $\delta$  158.38, 157.41, 143.65, 138.32, 137.16, 130.91, 130.18, 127.93, 126.88, 126.79, 126.18, 125.79, 118.38, 117.92, 34.64, 29.43, 20.71.

HRMS (ESI)  $[\text{M}+\text{H}]^+$  calculated  $m/z$  for  $[\text{C}_{20}\text{H}_{22}\text{NO}]^+$ : 292.1696, found: 292.1690.

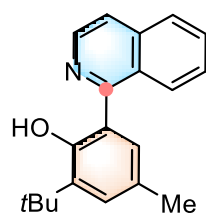

#### 2-(*tert*-Butyl)-6-(isoquinolin-1-yl)-4-methylphenol (**4i**)

Following the general procedure, **4i** was obtained in 44% yield as a yellow solid.

$^1\text{H}$  NMR (400 MHz,  $\text{DMSO-}d_6$ )  $\delta$  10.96 (s, 1H), 8.54 (d,  $J = 5.7$  Hz, 1H), 8.14 – 8.12 (m, 1H), 8.05 (d,  $J = 8.2$  Hz, 1H), 7.87 – 7.79 (m, 2H), 7.69 – 7.65 (m, 1H), 7.19 – 7.16 (m, 2H), 2.29 (s, 3H), 1.43 (s, 9H).

$^{13}\text{C}$  NMR (100 MHz,  $\text{DMSO-}d_6$ )  $\delta$  158.49, 152.53, 140.12, 137.15, 137.09, 130.66, 129.47, 128.42, 127.86, 127.38, 127.23, 126.65, 126.07, 122.70, 120.26, 34.64, 29.53, 20.62.

HRMS (ESI)  $[\text{M}+\text{H}]^+$  calculated  $m/z$  for  $[\text{C}_{20}\text{H}_{22}\text{NO}]^+$ : 292.1696, found: 292.1690.

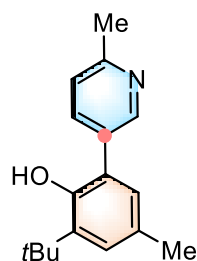

#### 2-(*tert*-Butyl)-4-methyl-6-(6-methylpyridin-3-yl)phenol (**4j**)

Following the general procedure, **4j** was obtained in 56% yield as a white solid.

$^1\text{H}$  NMR (400 MHz,  $\text{CDCl}_3$ )  $\delta$  8.70 (s, 1H), 7.86 (d,  $J = 8.0$  Hz, 1H), 7.32 (d,  $J = 8.0$  Hz, 1H), 7.16 (d,  $J = 2.2$  Hz, 1H), 6.87 (d,  $J = 2.2$  Hz, 1H), 5.67 (s, 1H), 2.64 (s, 3H), 2.33 (s, 3H), 1.46 (s, 9H).

$^{13}\text{C}$  NMR (100 MHz,  $\text{CDCl}_3$ )  $\delta$  157.32, 149.50, 149.38, 139.60, 137.30, 132.39, 129.66, 128.66, 128.39, 125.12, 124.81, 34.90, 29.95, 23.91, 20.91.

HRMS (ESI)  $[\text{M}+\text{H}]^+$  calculated  $m/z$  for  $[\text{C}_{17}\text{H}_{22}\text{NO}]^+$ : 256.1696, found: 256.1691.

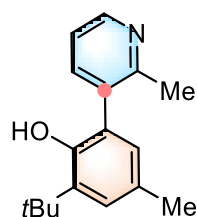

#### 2-(*tert*-Butyl)-4-methyl-6-(2-methylpyridin-3-yl)phenol (**4k**)

Following the general procedure, **4k** was obtained in 53% yield as a white solid.

$^1\text{H}$  NMR (400 MHz,  $\text{CDCl}_3$ )  $\delta$  8.45 (s, 1H), 7.53 (d,  $J = 7.6$  Hz, 1H), 7.18 – 7.14 (m, 1H), 7.06 (s, 1H), 6.66 (s, 1H), 5.10 (s, 1H), 2.31 (s, 3H), 2.23 (s, 3H), 1.36 (s, 9H).

$^{13}\text{C}$  NMR (100 MHz,  $\text{CDCl}_3$ )  $\delta$  158.08, 149.12, 148.88, 139.51, 136.80, 132.79, 129.18, 128.16, 128.00, 126.39, 121.77, 34.94, 29.77, 22.70, 20.91.

HRMS (ESI)  $[\text{M}+\text{H}]^+$  calculated  $m/z$  for  $[\text{C}_{17}\text{H}_{22}\text{NO}]^+$ : 256.1696, found: 256.1691.

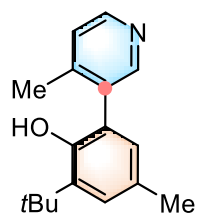

#### 2-(*tert*-Butyl)-4-methyl-6-(4-methylpyridin-3-yl)phenol (**4l**)

Following the general procedure, **4l** was obtained in 61% yield as a white solid.

$^1\text{H}$  NMR (400 MHz,  $\text{CDCl}_3$ )  $\delta$  8.31 (d,  $J = 5.3$  Hz, 1H), 8.23 (s, 1H), 7.23 (d,  $J = 5.3$  Hz, 1H), 7.08 (d,  $J = 2.2$  Hz, 1H), 6.62 (d,  $J = 2.2$  Hz, 1H), 4.99 (s, 1H), 2.22 (s, 3H), 2.16 (s, 3H), 1.36 (s, 9H).

$^{13}\text{C}$  NMR (100 MHz,  $\text{CDCl}_3$ )  $\delta$  150.38, 149.85, 149.70, 147.84, 137.37, 135.31, 129.43, 128.40, 128.32, 126.13, 124.47, 34.89, 29.83, 20.90, 19.76.

HRMS (ESI)  $[M+H]^+$  calculated  $m/z$  for  $[C_{17}H_{22}NO]^+$ : 256.1696, found: 256.1691.

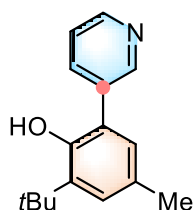

**2-(*tert*-Butyl)-4-methyl-6-(pyridin-3-yl)phenol (4m)**

Following the general procedure, **4m** was obtained in 43% yield as a white solid.

$^1H$  NMR (400 MHz, DMSO- $d_6$ )  $\delta$  8.61 (s, 1H), 8.50 (d,  $J = 5.0$  Hz, 1H), 8.07 (s, 1H), 7.86 – 7.83 (m, 1H), 7.45 – 7.42 (m, 1H), 7.04 (d,  $J = 2.2$  Hz, 1H), 6.87 – 6.86 (m, 1H), 2.24 (s, 3H), 1.38 (s, 9H).

$^{13}C$  NMR (100 MHz, DMSO- $d_6$ )  $\delta$  150.07, 149.79, 147.58, 138.72, 136.99, 135.12, 128.70, 127.96, 127.19, 123.48, 34.65, 29.84, 20.53.

HRMS (ESI)  $[M+H]^+$  calculated  $m/z$  for  $[C_{16}H_{20}NO]^+$ : 242.1539, found: 242.1534.

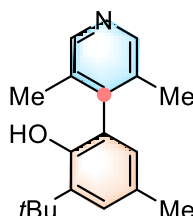

**2-(*tert*-Butyl)-6-(3,5-dimethylpyridin-4-yl)-4-methylphenol (4n)**

Following the general procedure, **4n** was obtained in 50% yield as a white solid.

$^1H$  NMR (400 MHz,  $CDCl_3$ )  $\delta$  7.05 (d,  $J = 2.2$  Hz, 1H), 6.96 (s, 2H), 6.77 (d,  $J = 2.2$  Hz, 1H), 5.80 (s, 1H), 2.46 (s, 6H), 2.23 (s, 3H), 1.37 (s, 9H).

$^{13}C$  NMR (101 MHz,  $CDCl_3$ )  $\delta$  158.65, 149.08, 147.25, 137.11, 129.25, 128.39, 127.83, 126.79, 121.00, 35.05, 29.84, 24.47, 20.91.

HRMS (ESI)  $[M+H]^+$  calculated  $m/z$  for  $[C_{18}H_{24}NO]^+$ : 270.1852, found: 270.1847.

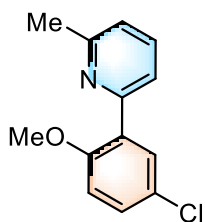

### 2-(5-Chloro-2-methoxyphenyl)-6-methylpyridine (6a)

Following the general procedure, **6a** was obtained in 31% yield as a white solid.

$^1\text{H}$  NMR (400 MHz, DMSO- $d_6$ )  $\delta$  7.75 – 7.67 (m, 3H), 7.43 (dd,  $J$  = 8.8, 2.9 Hz, 1H), 7.22 – 7.16 (m, 2H), 3.83 (s, 3H), 2.52 (s, 3H).

$^{13}\text{C}$  NMR (100 MHz, DMSO- $d_6$ )  $\delta$  157.65, 155.71, 152.63, 136.43, 129.91, 129.83, 129.27, 124.46, 121.84, 113.93, 56.04, 24.23.

HRMS (ESI)  $[\text{M}+\text{H}]^+$  calculated  $m/z$  for  $[\text{C}_{13}\text{H}_{13}\text{ClNO}]^+$ : 234.0680, found: 234.0676.

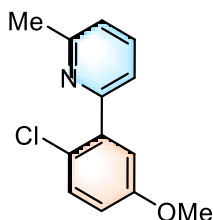

### 2-(2-Chloro-5-methoxyphenyl)-6-methylpyridine (6b)

Following the general procedure, **6b** was obtained in 24% yield as white solid.

$^1\text{H}$  NMR (400 MHz, DMSO- $d_6$ )  $\delta$  7.79 – 7.75 (m, 1H), 7.46 – 7.41 (m, 2H), 7.28 (d,  $J$  = 7.7 Hz, 1H), 7.07 – 6.00 (m, 2H), 3.79 (s, 3H), 2.52 (s, 3H).

$^{13}\text{C}$  NMR (100 MHz, DMSO- $d_6$ )  $\delta$  158.04, 157.71, 155.38, 139.97, 136.57, 130.69, 122.35, 122.18, 121.54, 116.51, 115.70, 55.59, 24.13.

HRMS (ESI)  $[\text{M}+\text{H}]^+$  calculated  $m/z$  for  $[\text{C}_{13}\text{H}_{13}\text{ClNO}]^+$ : 234.0680, found: 234.0677.

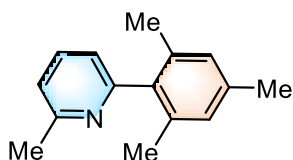

### 2-Mesityl-6-methylpyridine (8a)

Following the general procedure, **8** was obtained in 91% yield as white solid with HFIP as solvent (0.5 M).



$^1\text{H}$  NMR (400 MHz,  $\text{CDCl}_3$ )  $\delta$  7.61 – 7.49 (m, 1H), 7.02 (d,  $J = 7.6$  Hz, 1H), 6.94 (d,  $J = 7.6$  Hz, 1H), 6.84 (s, 2H), 2.53 (s, 3H), 2.23 (s, 3H), 1.94 (s, 6H).

$^{13}\text{C}$  NMR (100 MHz,  $\text{CDCl}_3$ )  $\delta$  159.43, 158.30, 137.96, 137.38, 136.59, 135.77, 128.39, 121.67, 121.10, 24.73, 21.19, 20.27.

HRMS (ESI)  $[\text{M}+\text{H}]^+$  calculated  $m/z$  for  $[\text{C}_{15}\text{H}_{18}\text{N}]^+$ : 212.1435, found: 212.1430.

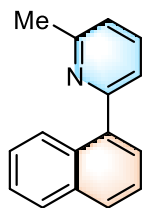

### 2-Methyl-6-(naphthalen-1-yl)pyridine (**8b-1**)

Following the general procedure, **8b-1** was obtained as white solid in 40% yield.

The spectra data were matched with the reported reference.<sup>1</sup>

$^1\text{H}$  NMR (400 MHz,  $\text{CDCl}_3$ )  $\delta$  7.97 (d,  $J = 7.4$  Hz, 1H), 7.82 (d,  $J = 7.4$  Hz, 2H), 7.65 – 7.61 (m, 1H), 7.52 – 7.36 (m, 4H), 7.29 (d,  $J = 7.7$  Hz, 1H), 7.13 (d,  $J = 7.7$  Hz, 1H), 2.60 (s, 3H).

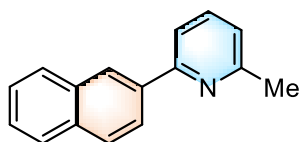

### 2-Methyl-6-(naphthalen-2-yl)pyridine (**8b-2**)

Following the general procedure, **8b-2** was obtained as white solid in 23% yield.

The spectra data were matched with the reported reference.<sup>2</sup>

$^1\text{H}$  NMR (400 MHz,  $\text{CDCl}_3$ )  $\delta$  8.40 (s, 1H), 8.07 (dd,  $J = 8.6, 1.8$  Hz, 1H), 7.89 – 7.85 (m, 2H), 7.81 – 7.78 (m, 1H), 7.64 – 7.59 (m, 2H), 7.45 – 7.41 (m, 2H), 7.07 – 7.05 (m, 1H), 2.61 (s, 3H).

### Reference

1. So, C. M.; Lau, C. P.; Kwong, F. Y. *Org. Lett.* **2007**, *9*, 2795.
2. Addla, D.; Kanteveri, S. *J. Heterocyclic Chem.* **2014**, *51*, E384.

## Crystallographic Data

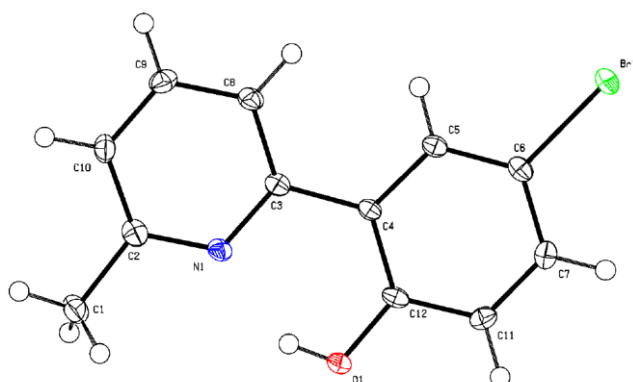

|                                             |                                                               |
|---------------------------------------------|---------------------------------------------------------------|
| Empirical formula                           | C <sub>12</sub> H <sub>10</sub> BrNO                          |
| Formula weight                              | 264.12                                                        |
| Temperature/K                               | 100                                                           |
| Crystal system                              | triclinic                                                     |
| Space group                                 | P-1                                                           |
| a/Å                                         | 7.127 (2)                                                     |
| b/Å                                         | 7.435 (3)                                                     |
| c/Å                                         | 10.981 (4)                                                    |
| α/°                                         | 72.738 (11)                                                   |
| β/°                                         | 84.610 (12)                                                   |
| γ/°                                         | 67.998 (12)                                                   |
| Volume/Å <sup>3</sup>                       | 515.1 (3)                                                     |
| Z                                           | 2                                                             |
| ρ <sub>calc</sub> /cm <sup>3</sup>          | 1.703                                                         |
| μ/mm <sup>-1</sup>                          | 3.959                                                         |
| F(000)                                      | 264.0                                                         |
| Crystal size/mm <sup>3</sup>                | 0.38 × 0.14 × 0.12                                            |
| Radiation                                   | MoKα (λ = 0.71073)                                            |
| 2θ range for data collection/°              | 6.162 to 56.75                                                |
| Index ranges                                | -9 ≤ h ≤ 9, -9 ≤ k ≤ 9, -14 ≤ l ≤ 14                          |
| Reflections collected                       | 8229                                                          |
| Independent reflections                     | 2560 [R <sub>int</sub> = 0.0637, R <sub>sigma</sub> = 0.0590] |
| Data/restraints/parameters                  | 2560/0/138                                                    |
| Goodness-of-fit on F <sup>2</sup>           | 1.061                                                         |
| Final R indexes [I ≥ 2σ (I)]                | R <sub>1</sub> = 0.0343, wR <sub>2</sub> = 0.0790             |
| Final R indexes [all data]                  | R <sub>1</sub> = 0.0436, wR <sub>2</sub> = 0.0828             |
| Largest diff. peak/hole / e Å <sup>-3</sup> | 0.84/-0.73                                                    |

## Gram-Scale Synthesis

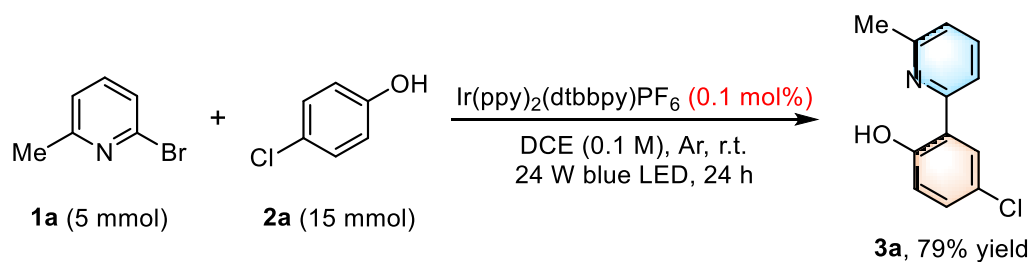

To an oven-dried 100 mL Schlenk bottle equipped with magnetic bar was added 4-chlorophenol **2a** (1.92 g, 15 mmol, 3 equiv), Ir(ppy)<sub>2</sub>(dtbbpy)PF<sub>6</sub> (4.6 mg, 0.1 mol%). The mixture was then placed under vacuum and backfilled with argon three times, followed by the addition of DCE (50 mL) and bromopyridine **1a** (860 mg, 5 mmol, 1 equiv). Then the tube was placed approximate 4~5 cm away from 24 W blue LED and stir vigorously for 24 h with a cooling fan to maintain the reaction at r.t. (about 25 °C). Upon completion of the reaction monitored by TLC, the mixture was concentrated and purified by silica chromatography (pre-basified with Et<sub>3</sub>N) to afford product **3a** (867 mg, yellow solid).

## Mechanistic Investigations

### 1. Protection of hydroxyl group

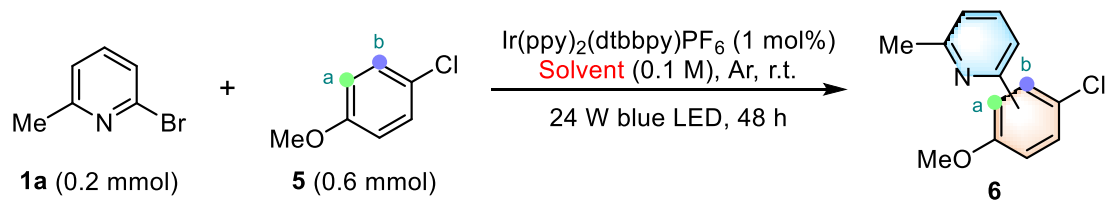

**Table S4.** Solvent effect

| Entry | Solvent | Yield (%)                           |
|-------|---------|-------------------------------------|
| 1     | DCE     | 0                                   |
| 2     | HFIP    | 55 ( <b>6a</b> : <b>6b</b> = 1.3:1) |

### 2. Radical trapping experiment

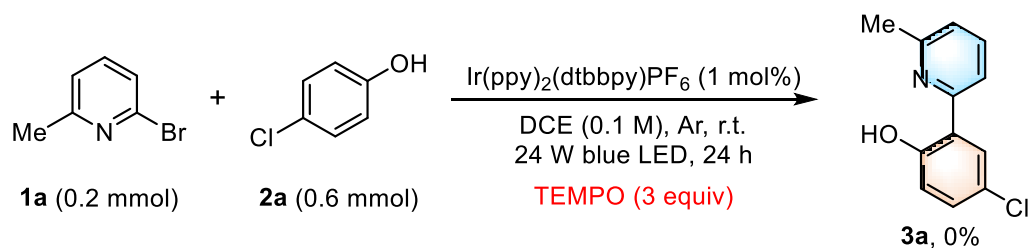

### 3. $^1\text{H}$ NMR experiment

In order to examine the interaction between 2-bromo-6-methylpyridine (**1a**) and 4-chlorophenol (**2a**), we carried out the  $^1\text{H}$  NMR experiment of the mixture of **1a** and **2a** in 1:3 ratio in  $\text{CDCl}_3$  and compared the spectrum with individual  $^1\text{H}$  NMR spectrum of **1a** and **2a** ( $\text{CDCl}_3$  as locking solvent). As can be seen from Fig. S1, the mixing of **1a** and **2a** caused noticeable shift in the proton signals of both substrates. In particular, the hydroxyl proton of **2a** has shifted from 5.17 ppm to the region between 6.88 to 6.71 ppm, and the proton adjacent to methyl group in **1a** has shifted from 7.10 ppm to the region of 6.88-6.71 ppm. Besides, there were only three sets of proton signals observed for **2a**, indicating that the protonation process was in an equilibrium between **1a** and **2a**.

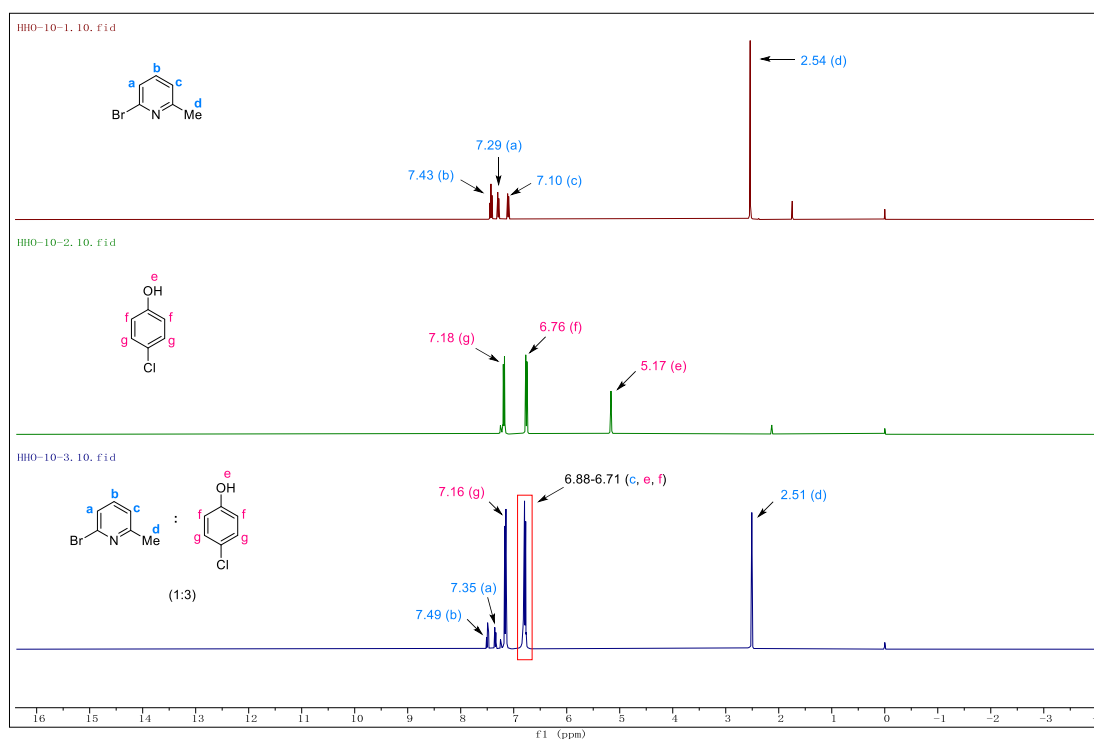

**Fig.S1**  $^1\text{H}$  NMR experiment of **1a** and **2a** in  $\text{CDCl}_3$

#### 4. Control experiment

In order to examine the possible mechanistic pathway of oxidation of phenolate to radical intermediate or the formation of EDA complex between 2-bromo-6-methylpyridine (**1a**) and phenolate ion, we designed and carried out the experiments using sodium phenolate as substrate using reaction conditions that include and exclude the photocatalyst. According to the results in Fig.S2, there was no product detected in both scenarios, ruling out the plausible involvement of EDA complex and phenol radical in the mechanistic pathway.

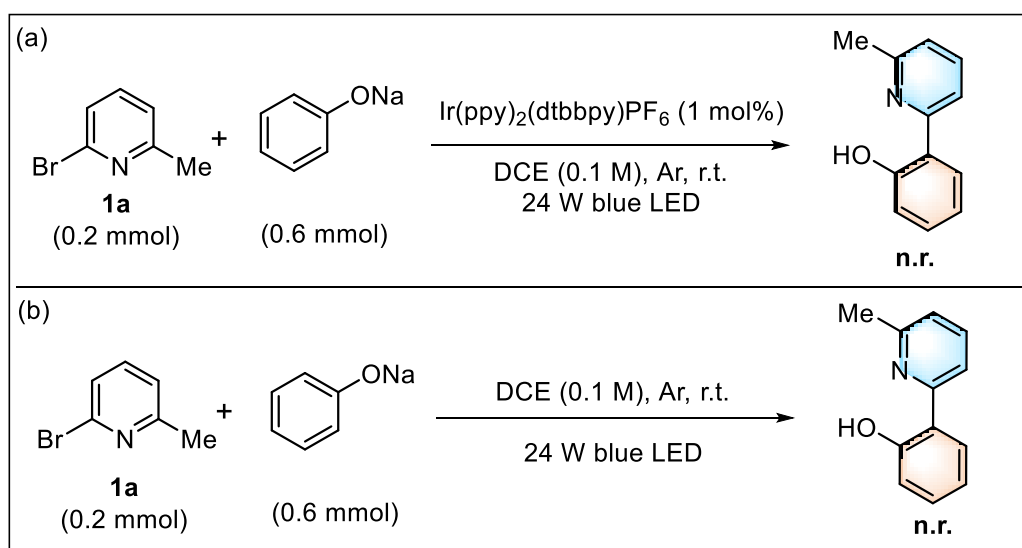

Fig.S2 Control experiment with sodium phenolate

# Copies of $^1\text{H}$ , $^{13}\text{C}$ and $^{19}\text{F}$ NMR Spectra

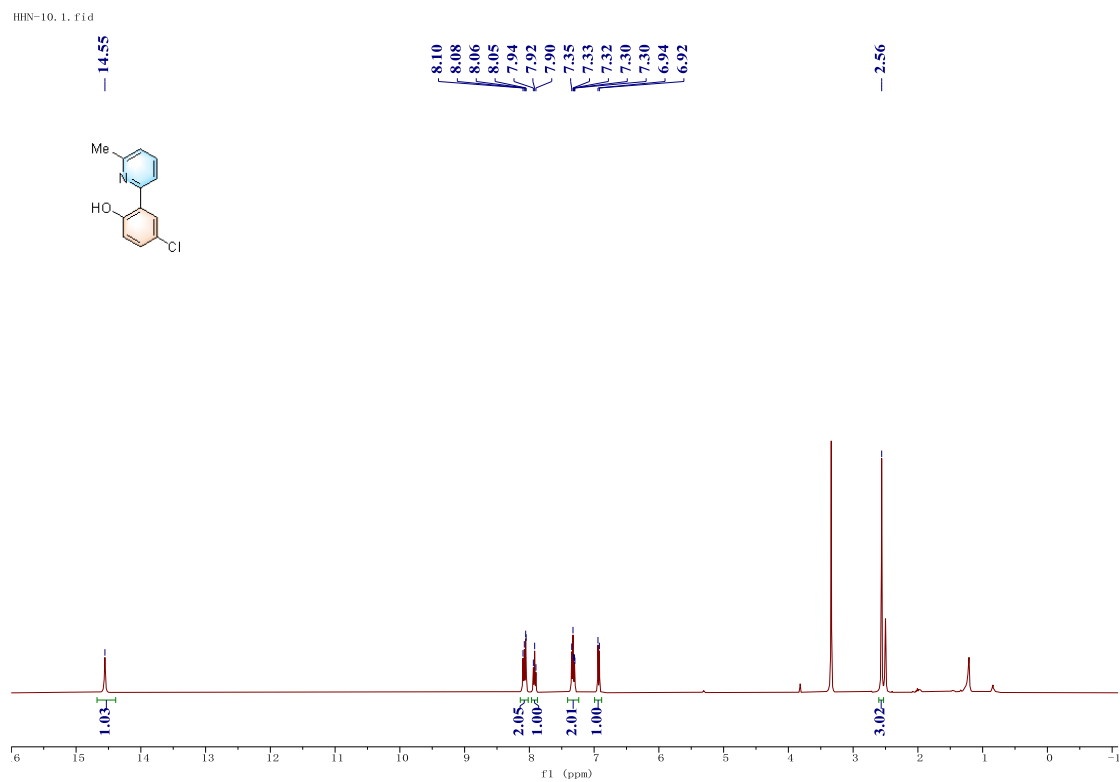

$^1\text{H}$  NMR spectrum of 3a

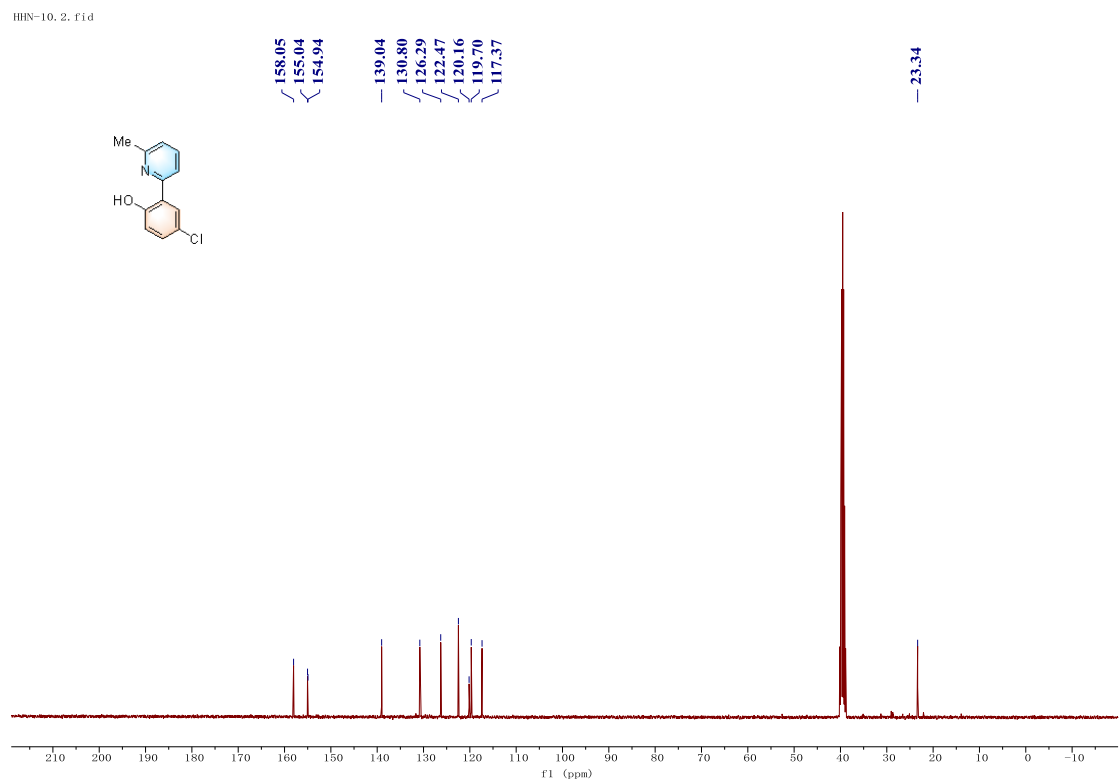

$^{13}\text{C}$  NMR spectrum of 3a

HN-31.1.fid

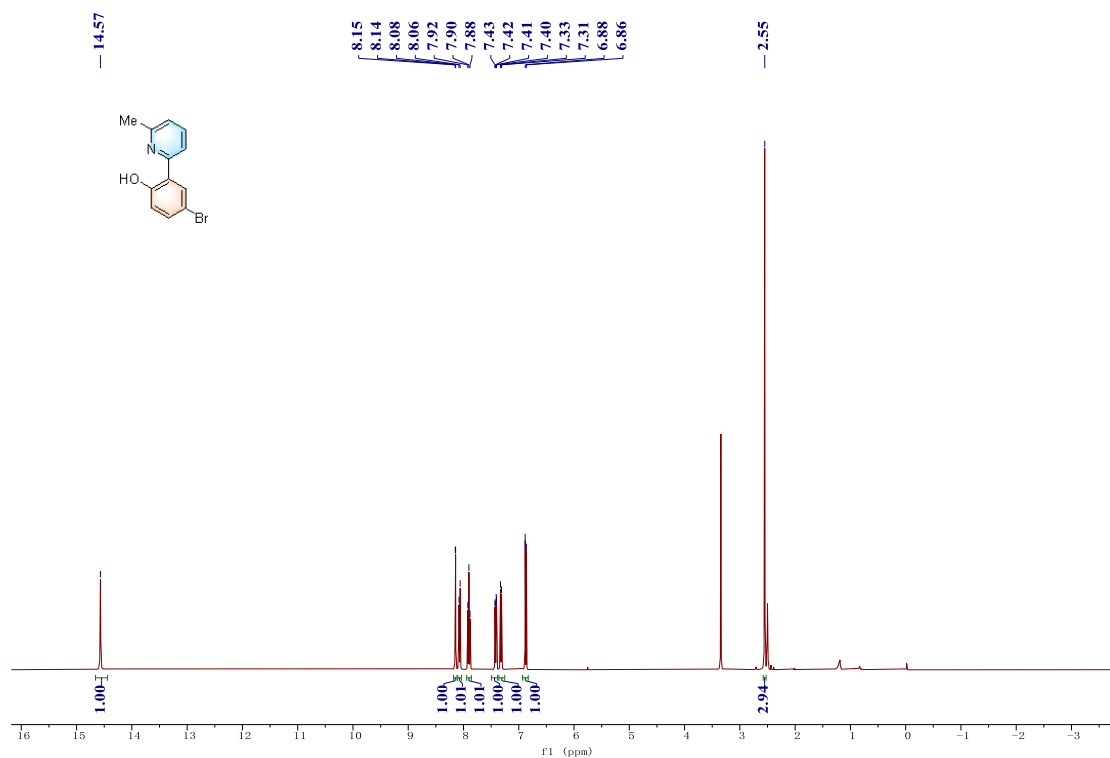

<sup>1</sup>H NMR spectrum of 3b

HN-31.2.fid

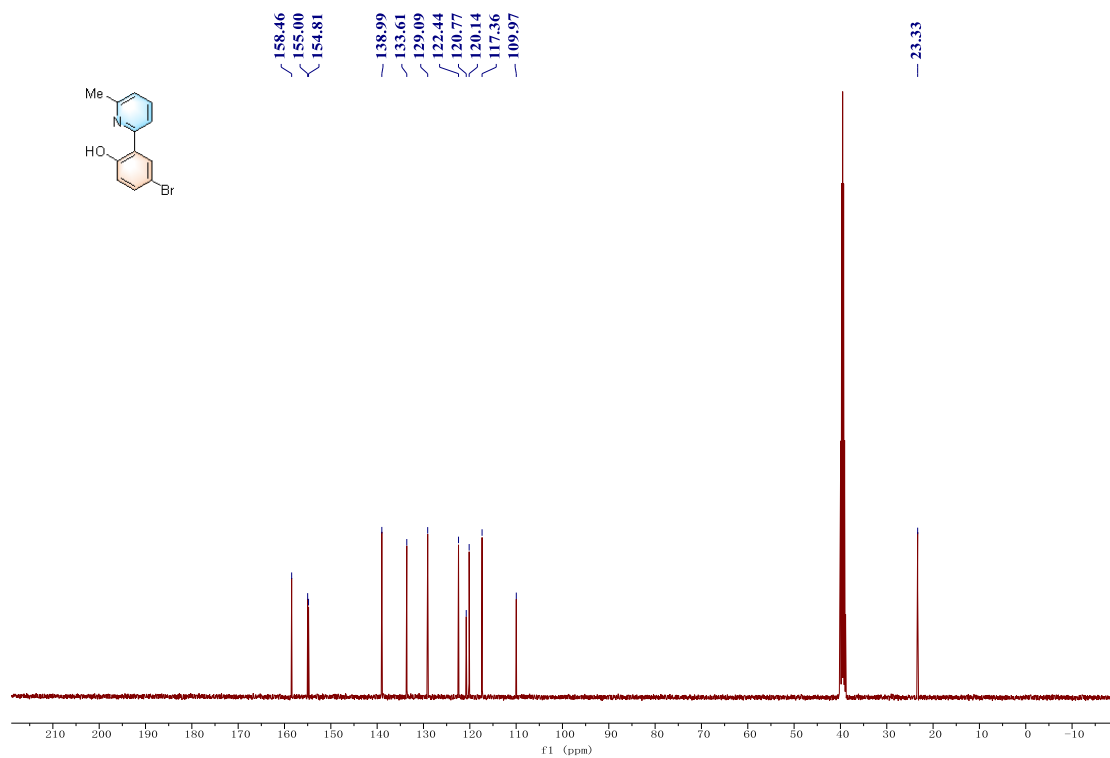

<sup>13</sup>C NMR spectrum of 3b



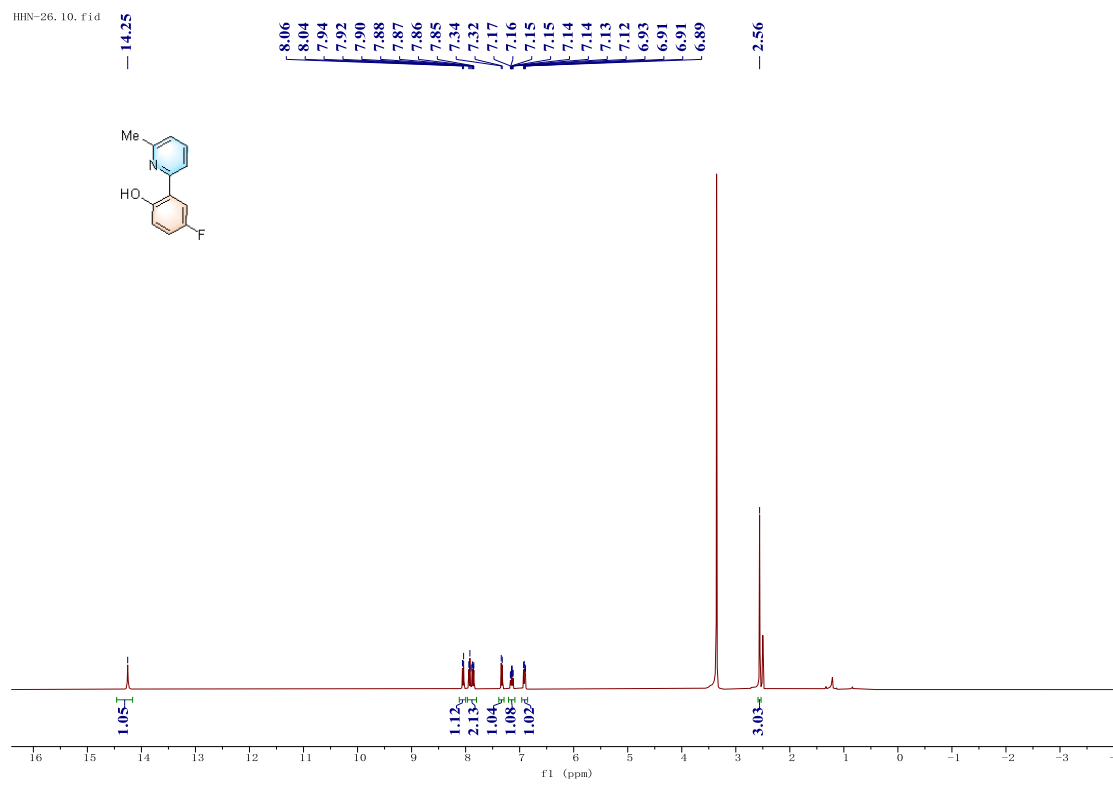

<sup>1</sup>H NMR spectrum of 3c

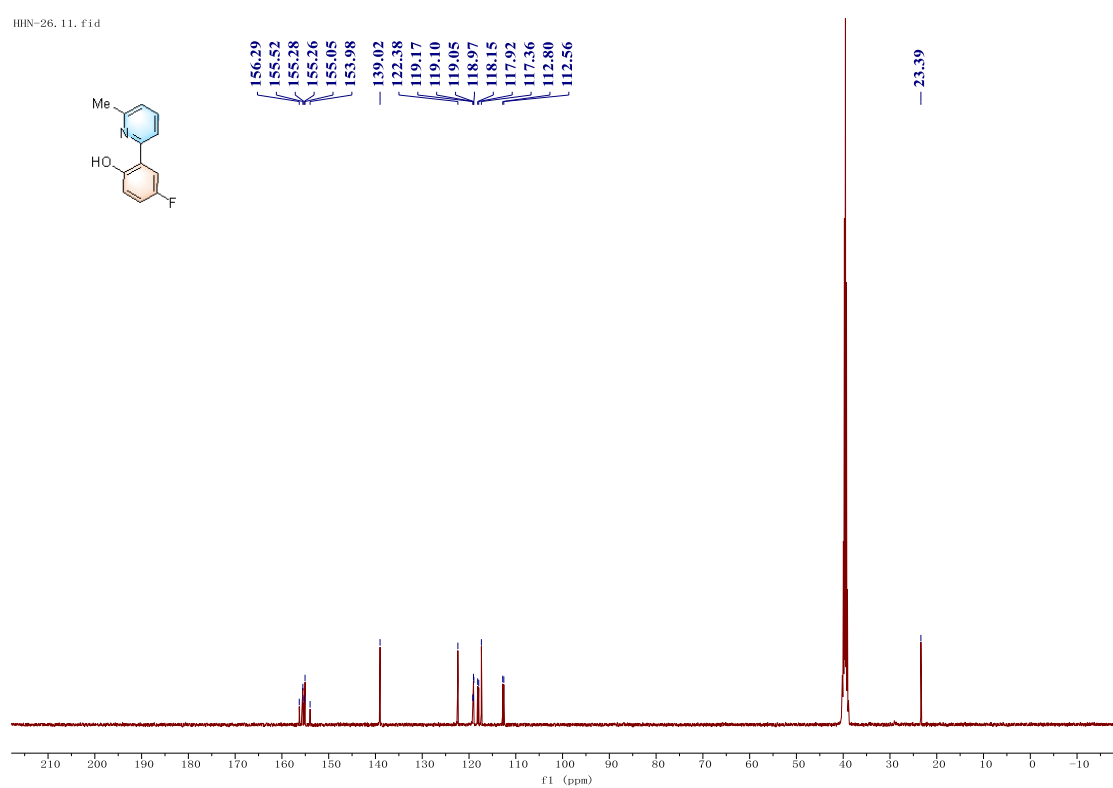

<sup>13</sup>C NMR spectrum of 3c

HIN-26.2.fid

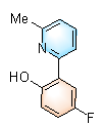

-125.79

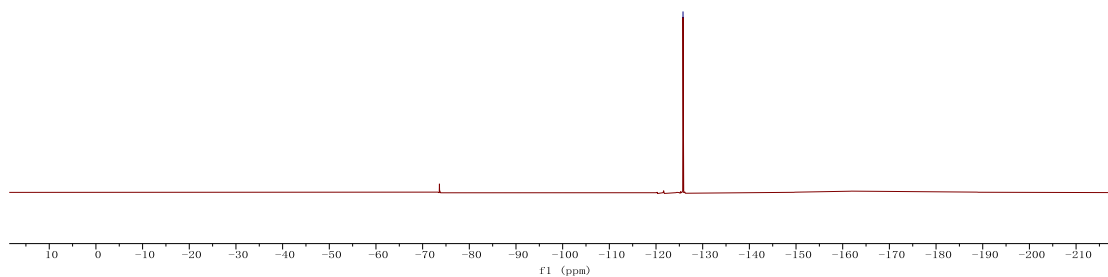

**<sup>19</sup>F NMR spectrum of 3c**

HN-78.1.fid

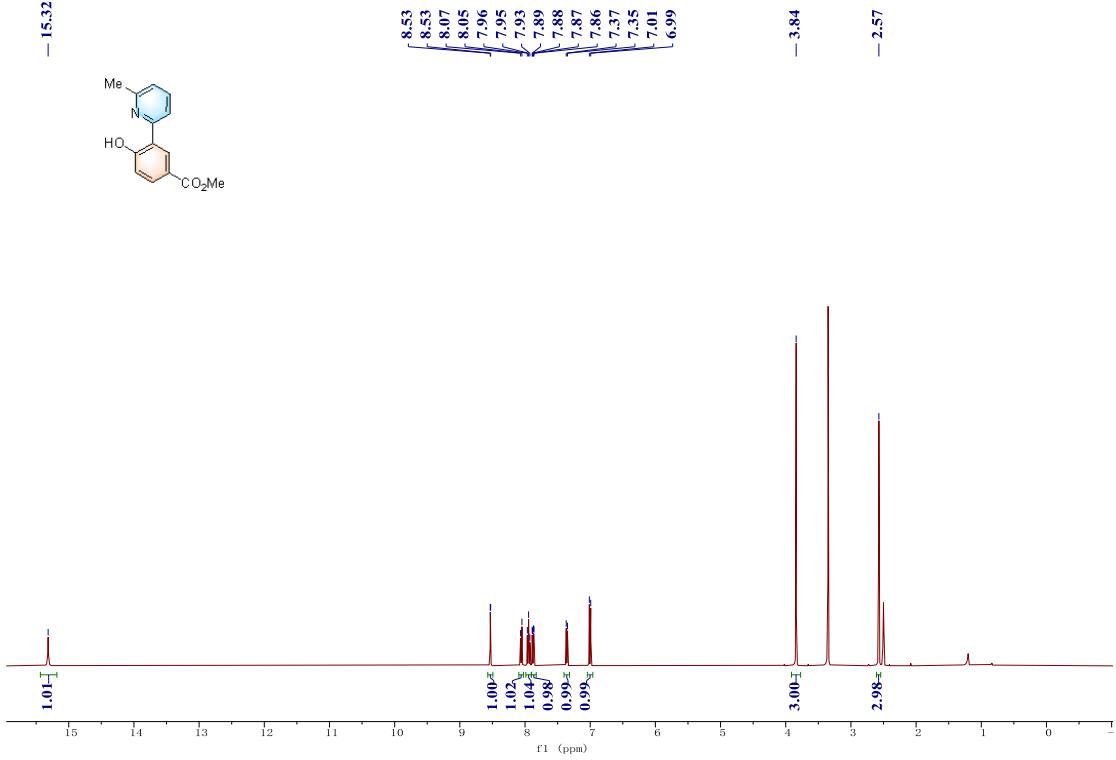

<sup>1</sup>H NMR spectrum of 3d

HN-78.2.fid

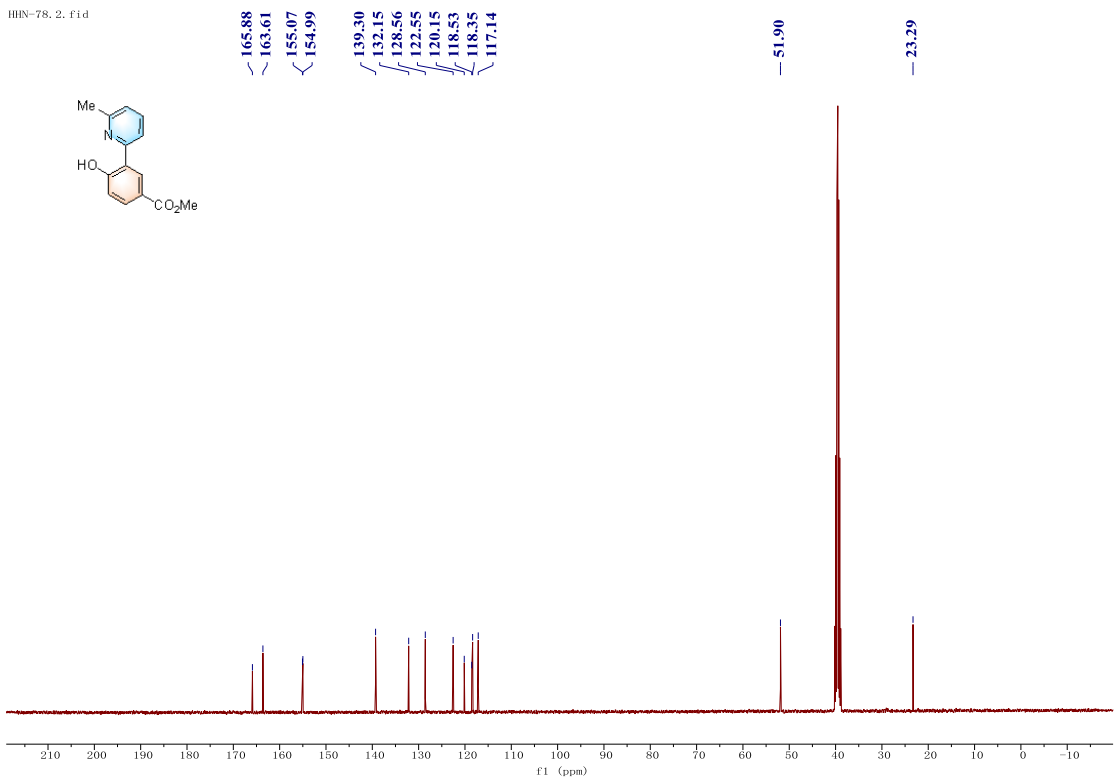

<sup>13</sup>C NMR spectrum of 3d

HN-97.1.fid

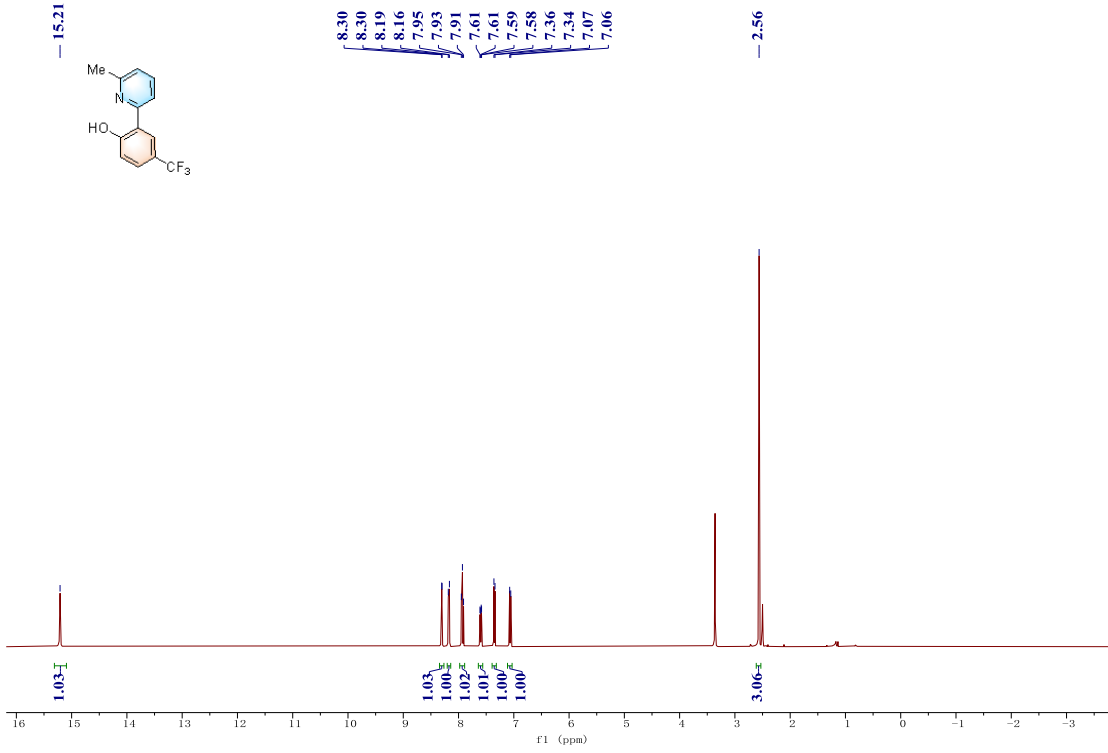

<sup>1</sup>H NMR spectrum of 3e

HN-97.2.fid

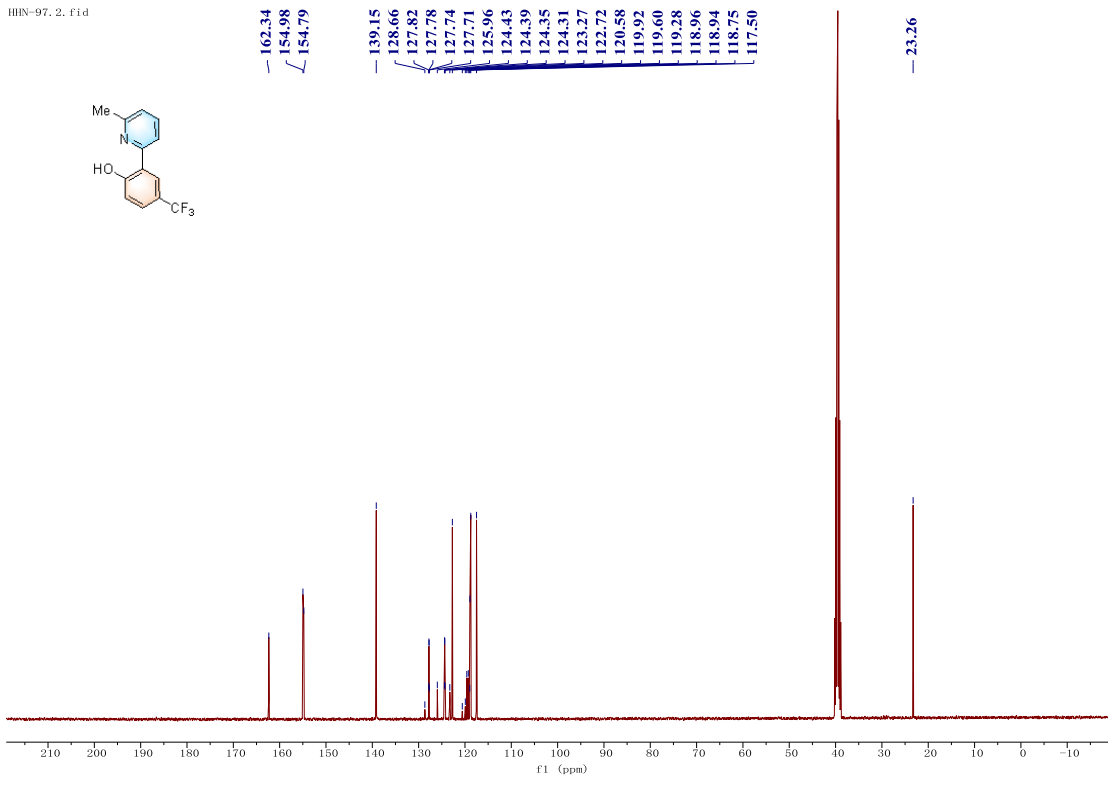

<sup>13</sup>C NMR spectrum of 3e

HIN-97\_4.fid

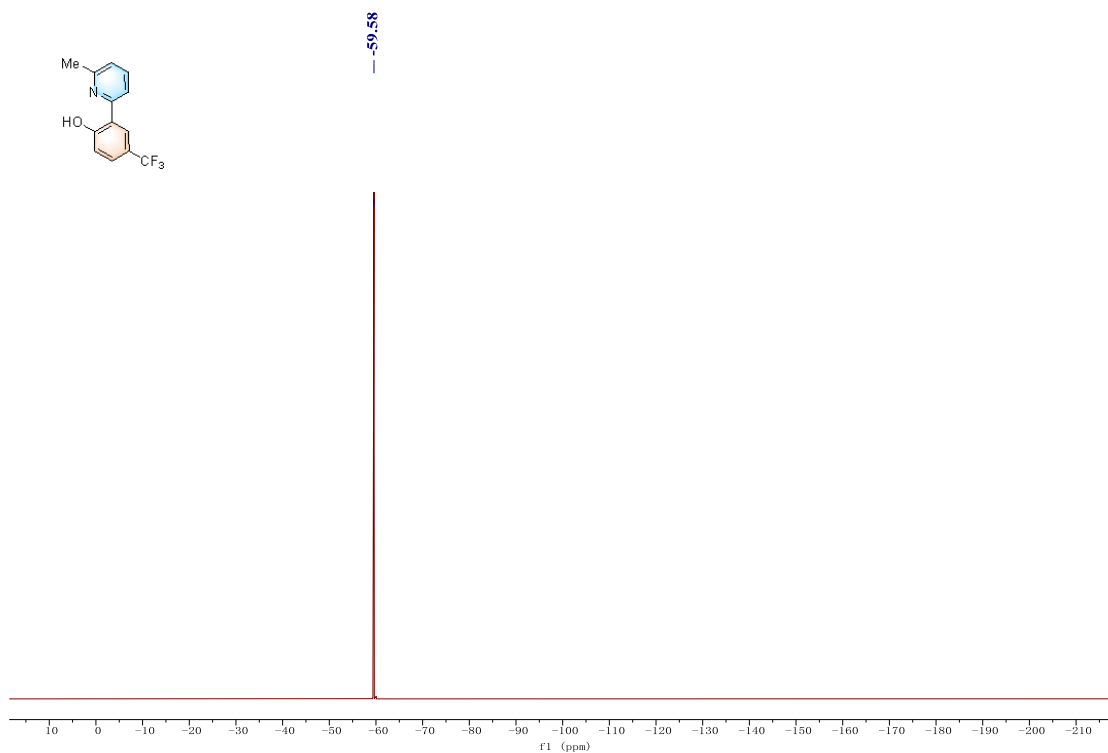

$^{19}\text{F}$  NMR spectrum of 3e

HN-75.2.fid

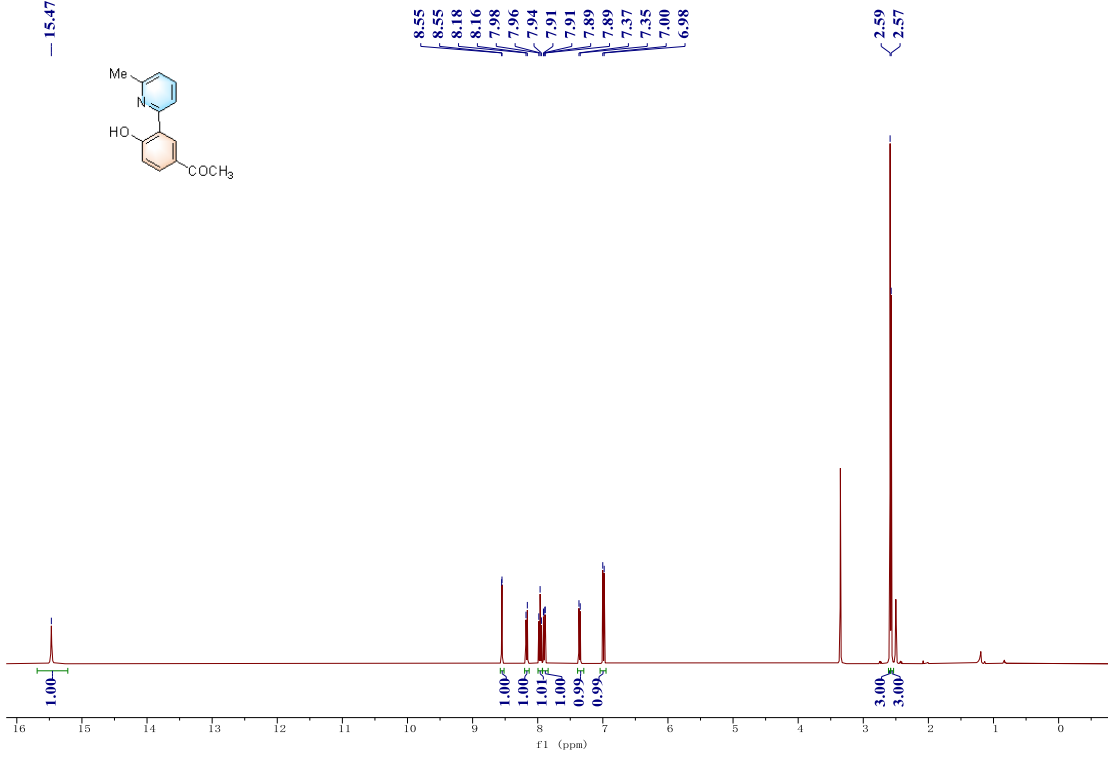

<sup>1</sup>H NMR spectrum of 3f

HN-75.3.fid

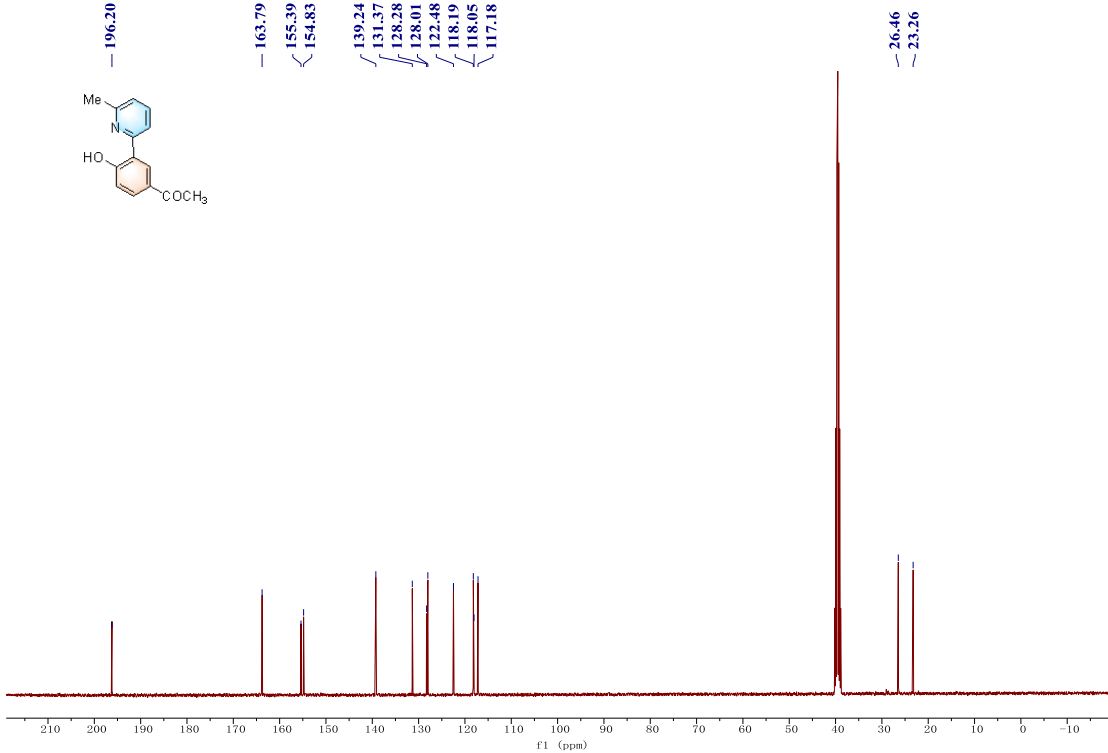

<sup>13</sup>C NMR spectrum of 3f

HN-74.2. F1d

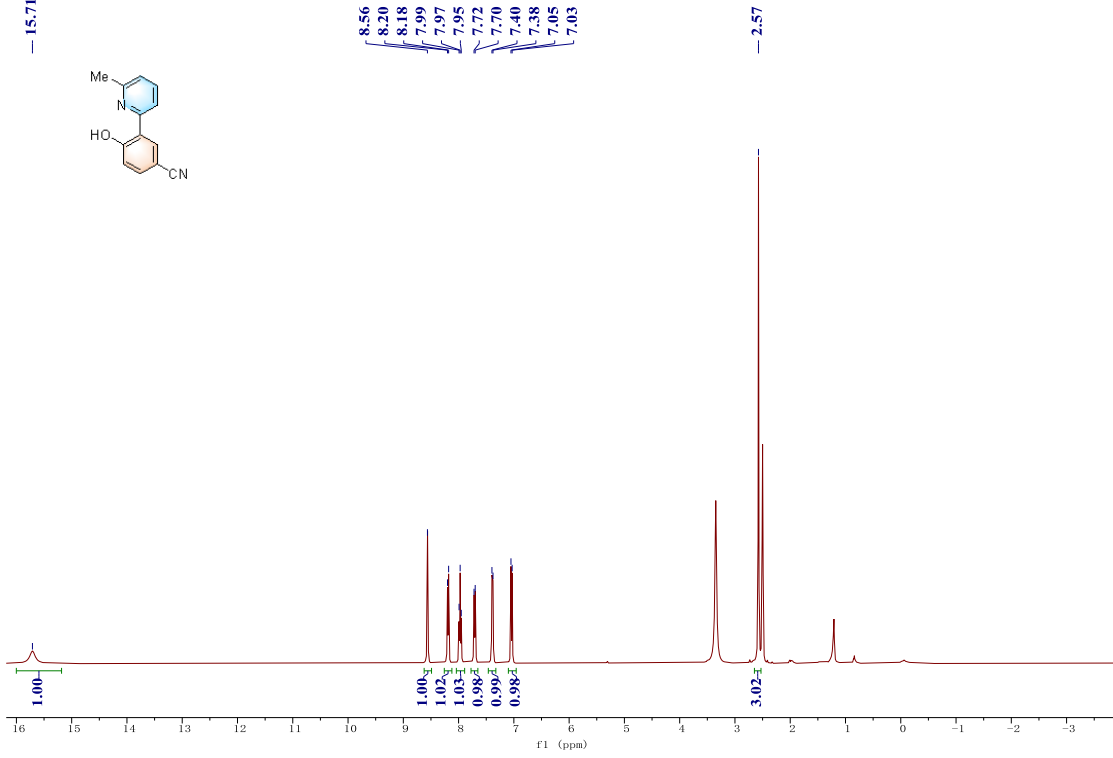

<sup>1</sup>H NMR spectrum of 3g

HN-74.3. F1d

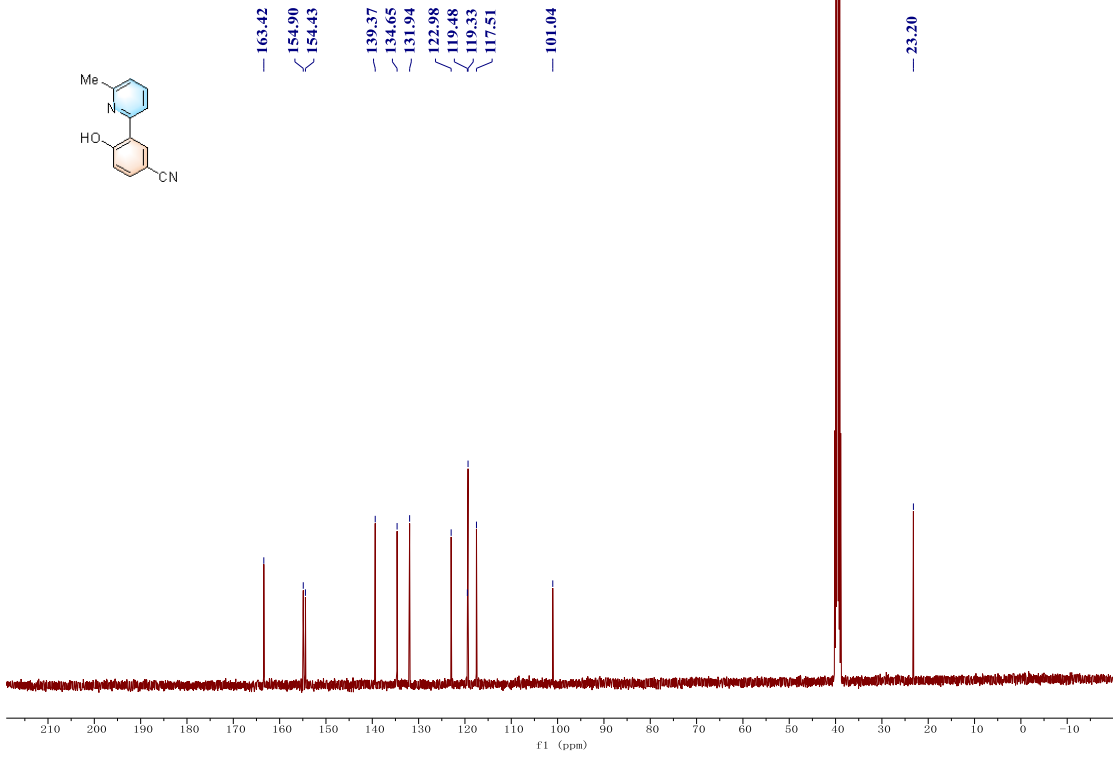

<sup>13</sup>C NMR spectrum of 3g

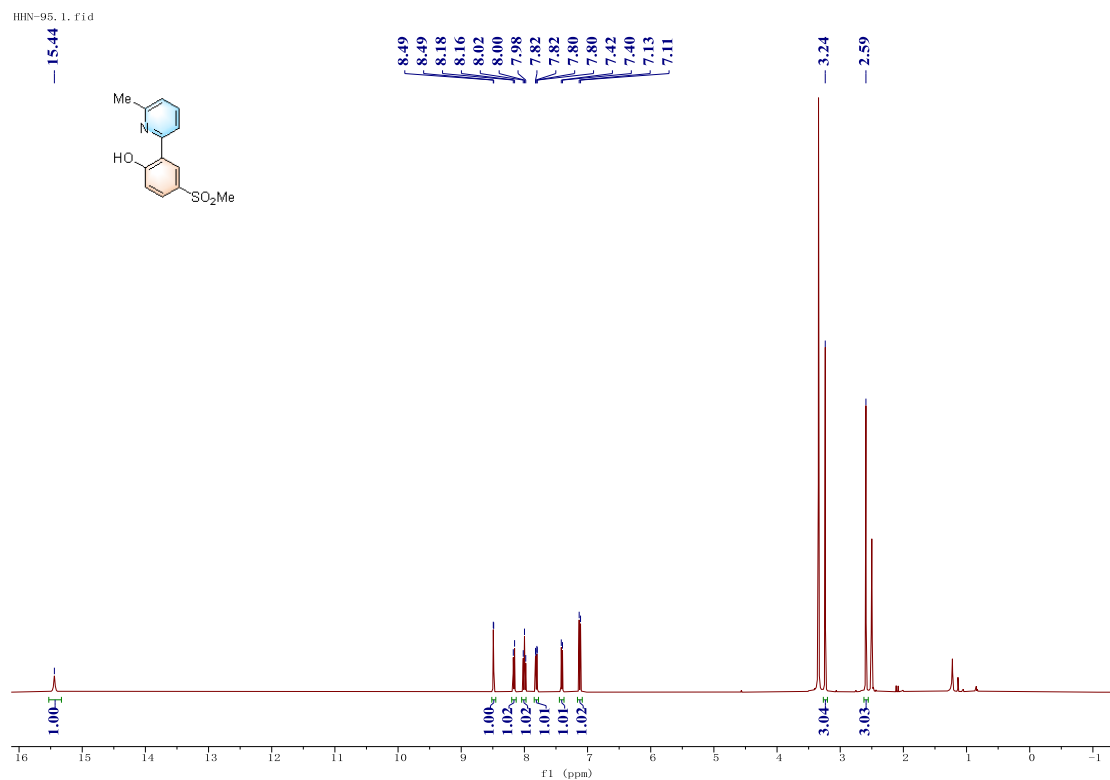

**<sup>1</sup>H NMR spectrum of 3h**

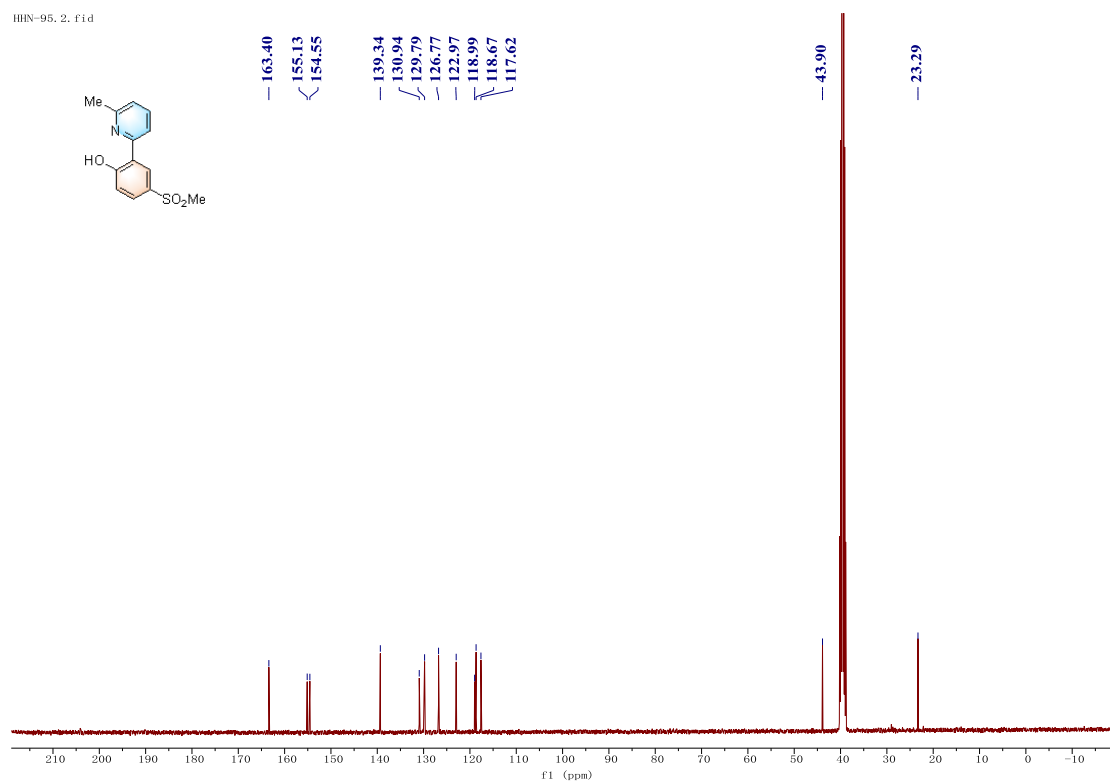

**<sup>13</sup>C NMR spectrum of 3h**



HN-70a.1.fid

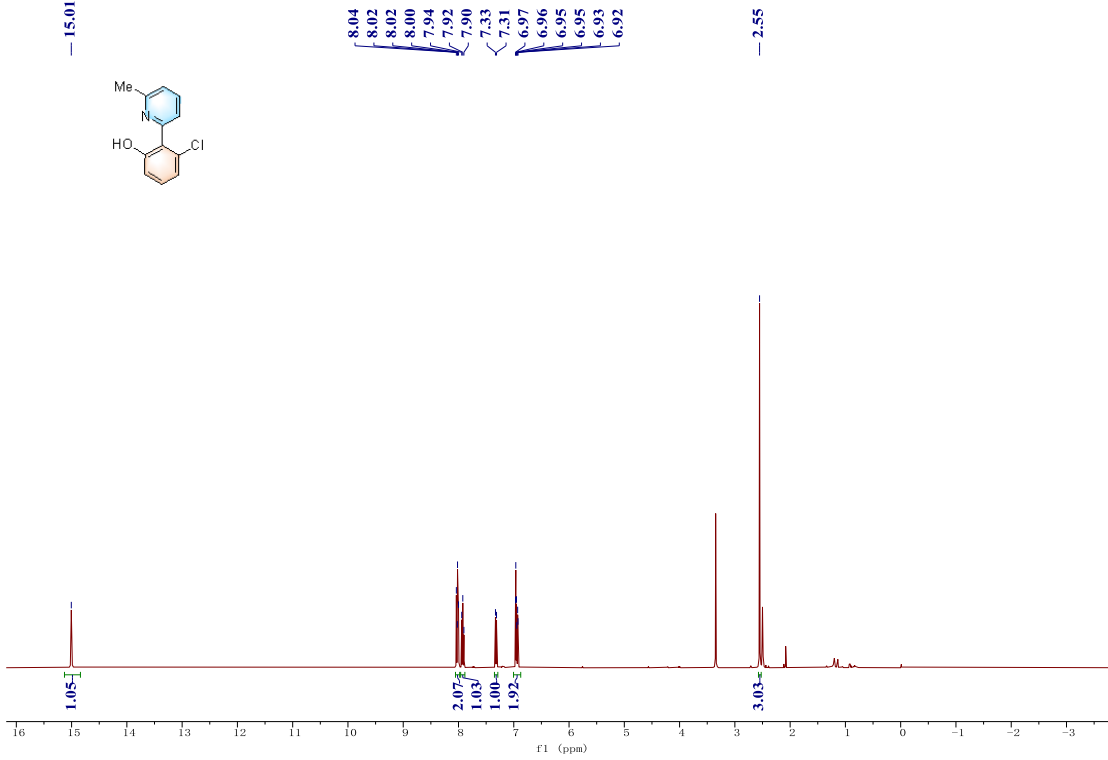

**<sup>1</sup>H NMR spectrum of 3i**

HN-70a.2.fid

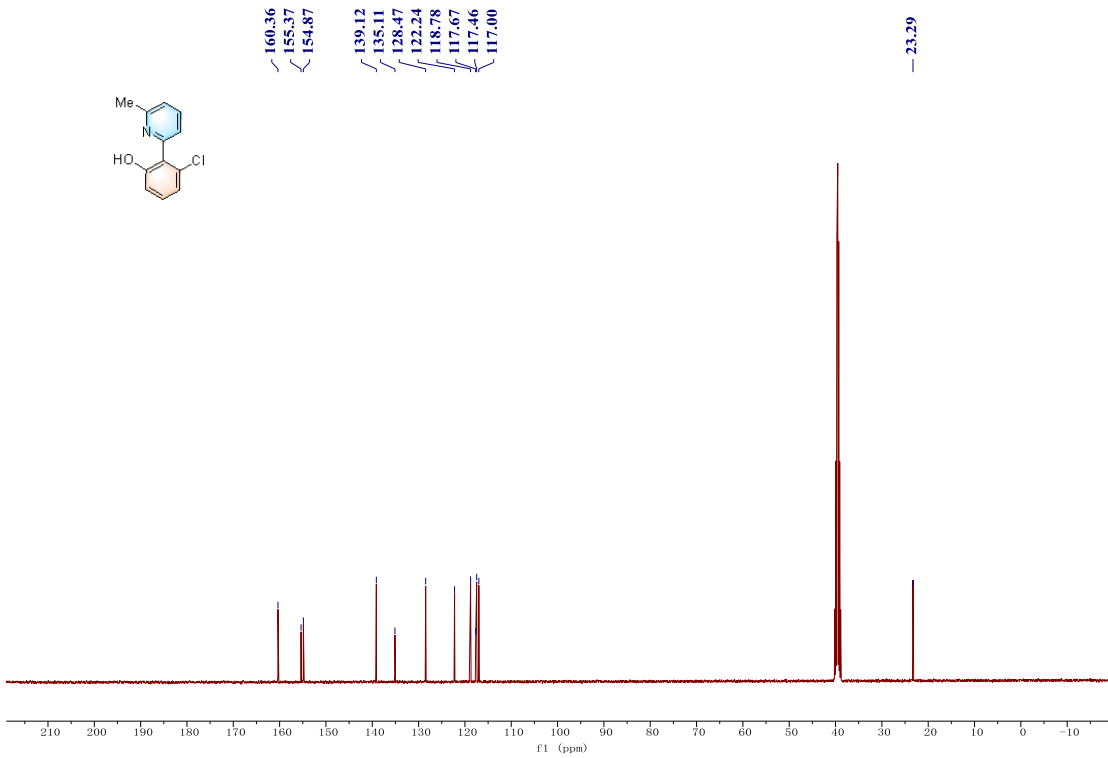

**<sup>13</sup>C NMR spectrum of 3i**

HN-89a. 1. fid

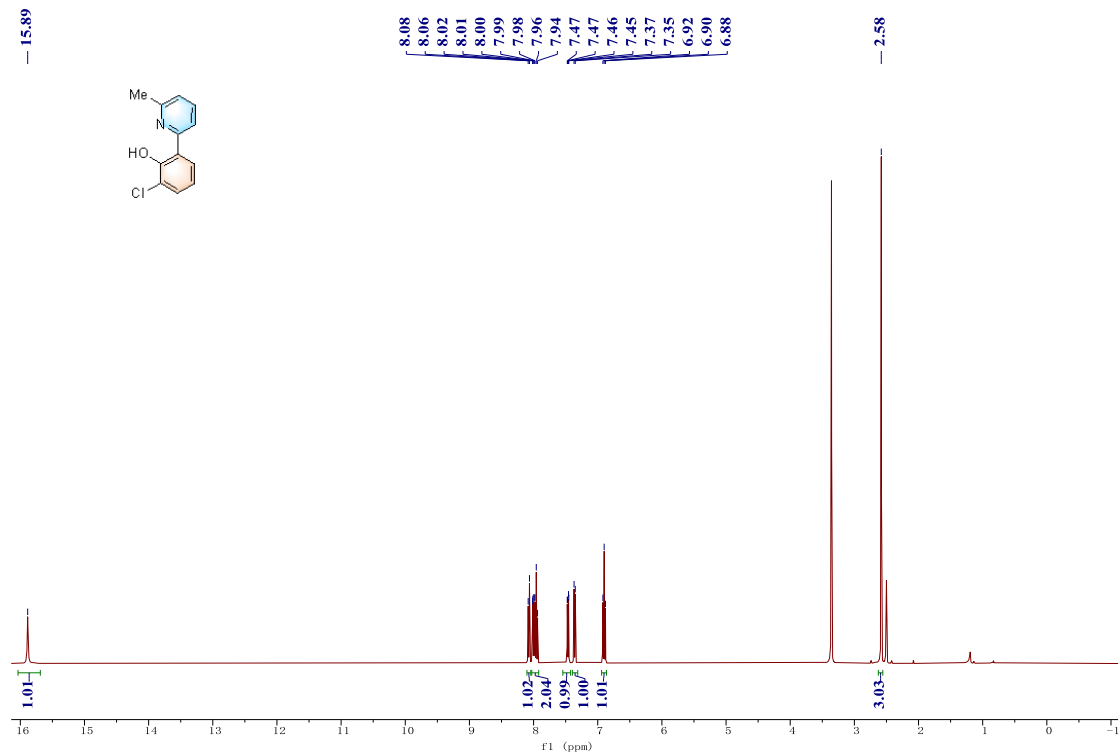

<sup>1</sup>H NMR spectrum of 3j

HN-89a. 2. fid

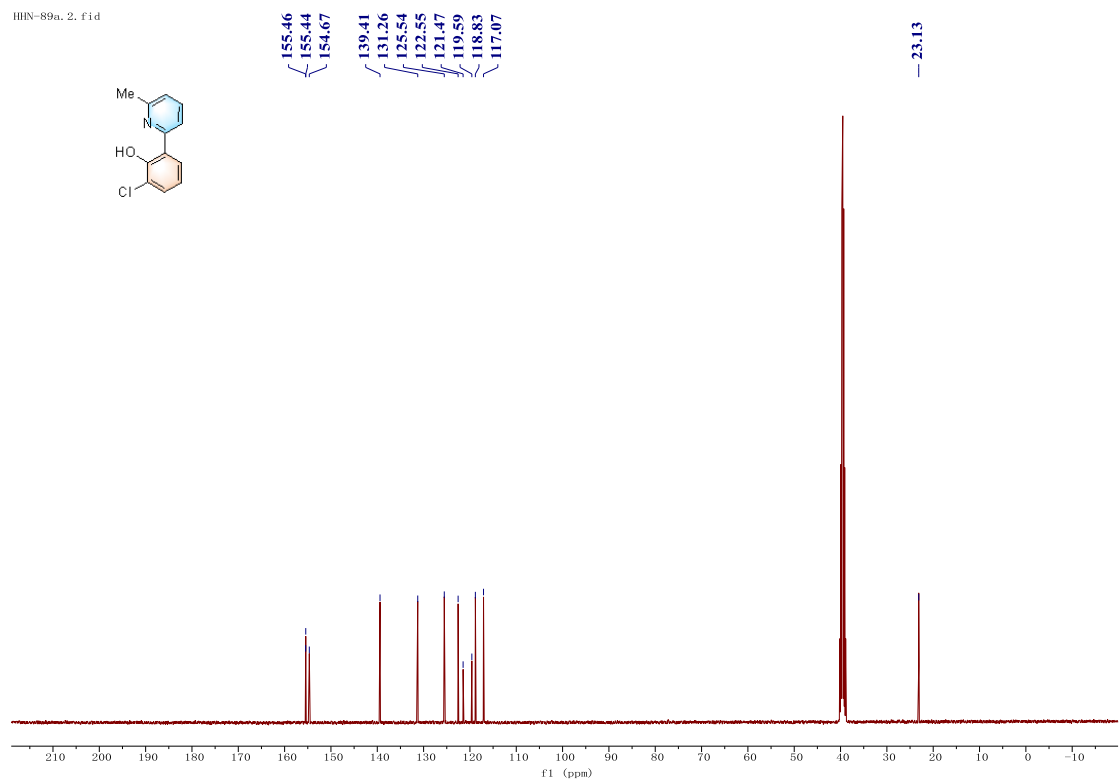

<sup>13</sup>C NMR spectrum of 3j

HN-99.1.fid

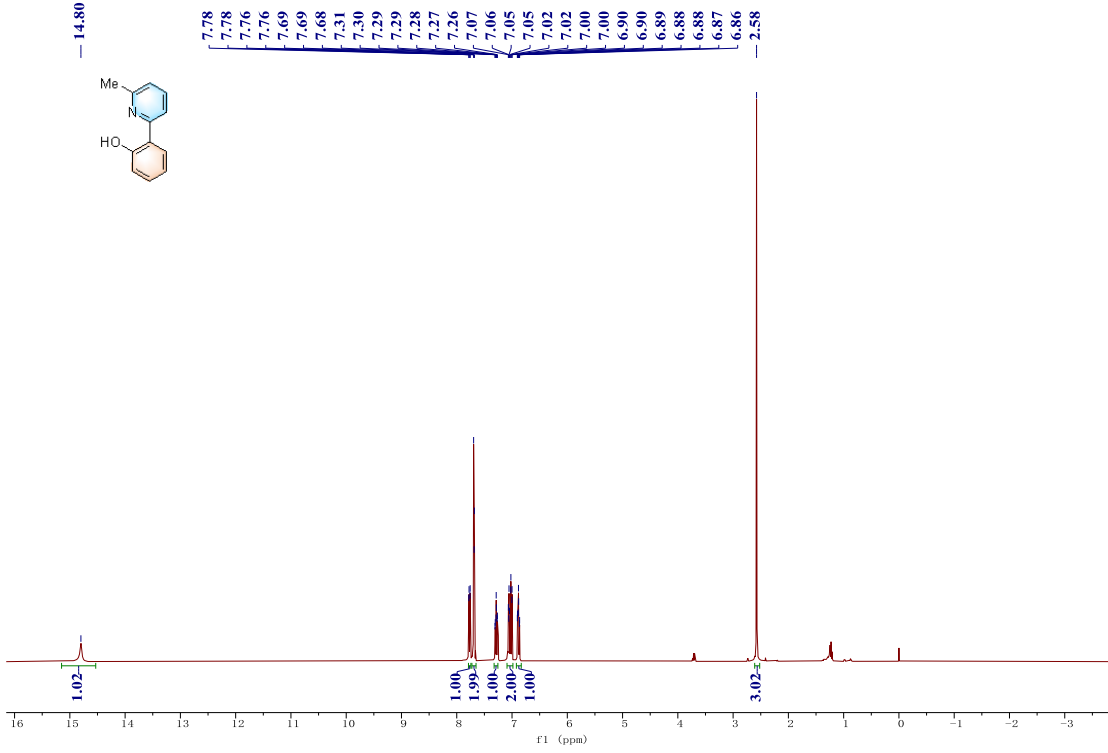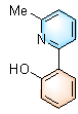

<sup>1</sup>H NMR spectrum of 3k

HN-99.2.fid

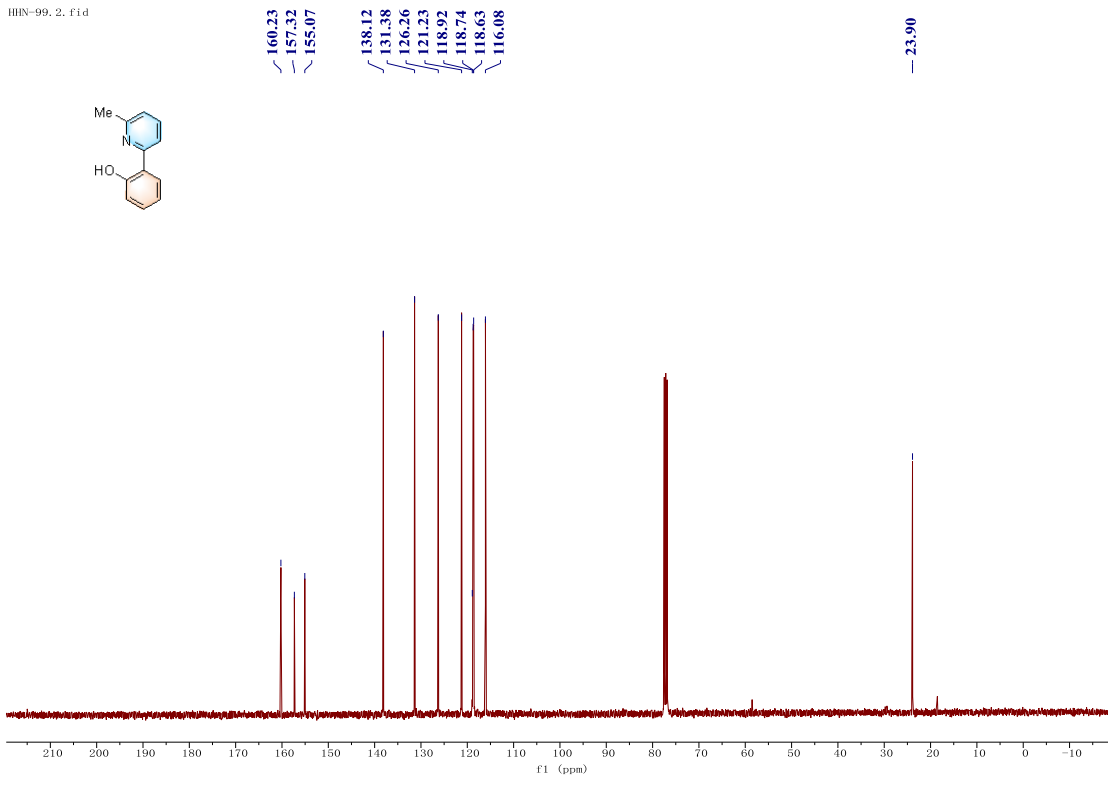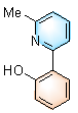

<sup>13</sup>C NMR spectrum of 3k

HN-45.1. F1d

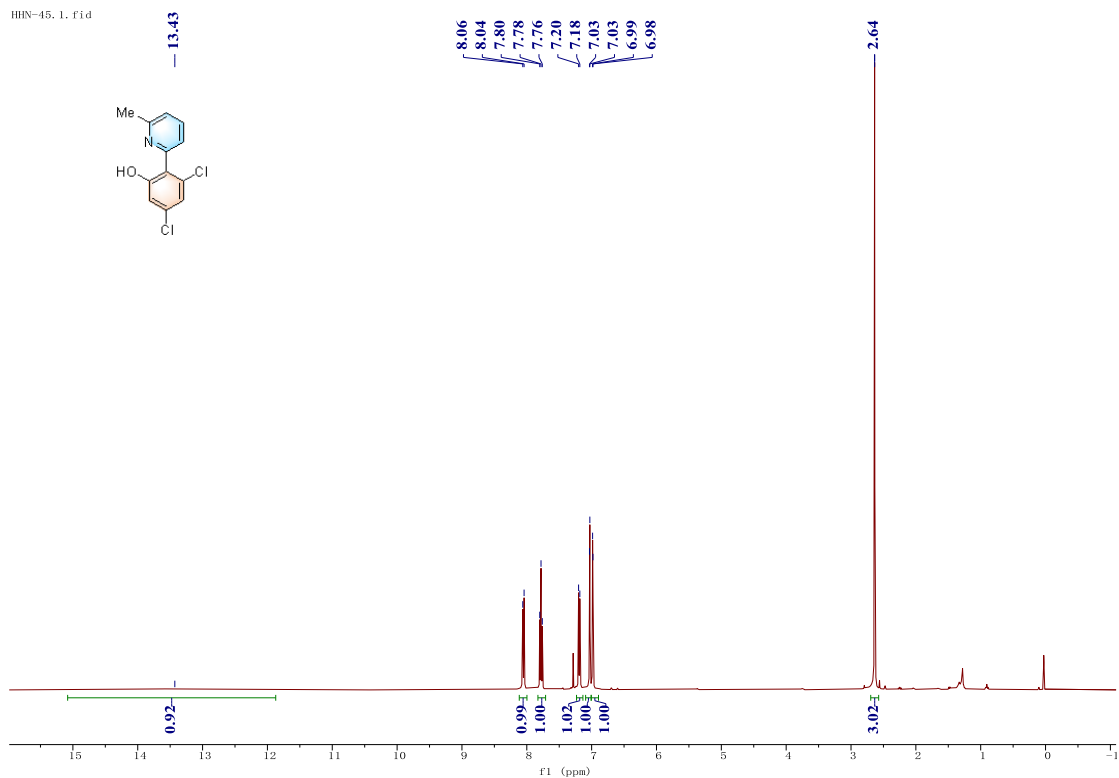

<sup>1</sup>H NMR spectrum of 3l

HN-45.2. F1d

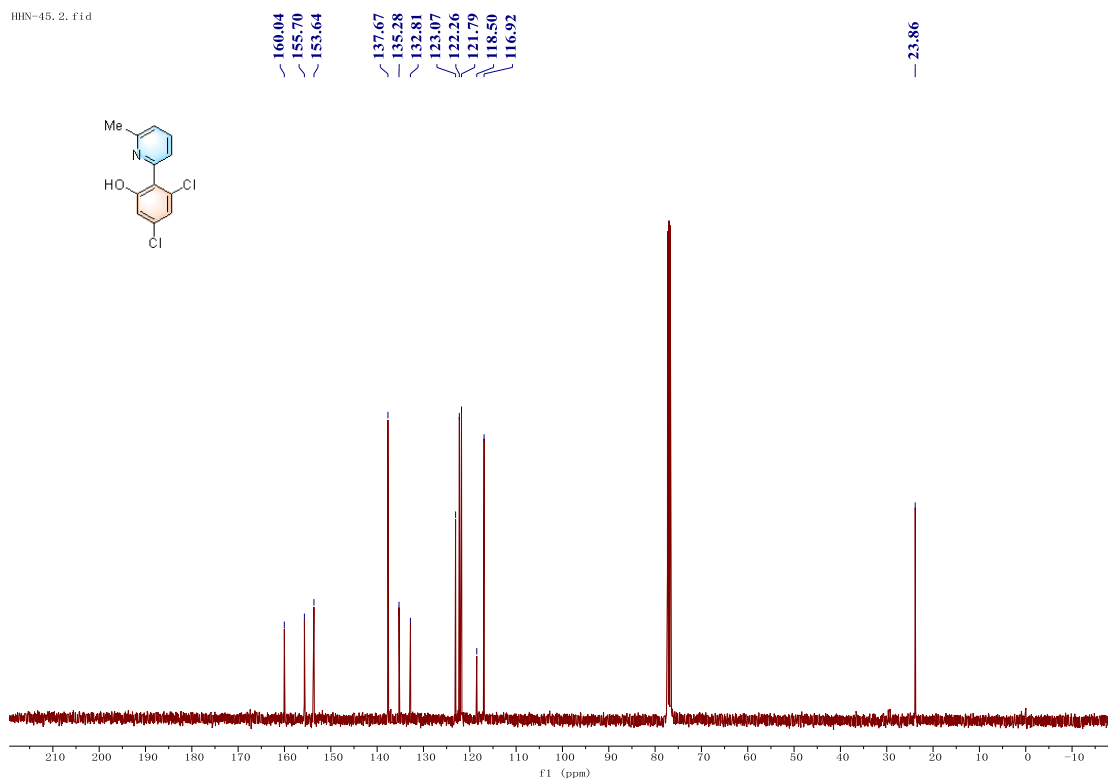

<sup>13</sup>C NMR spectrum of 3l

HN-77.1.Fid

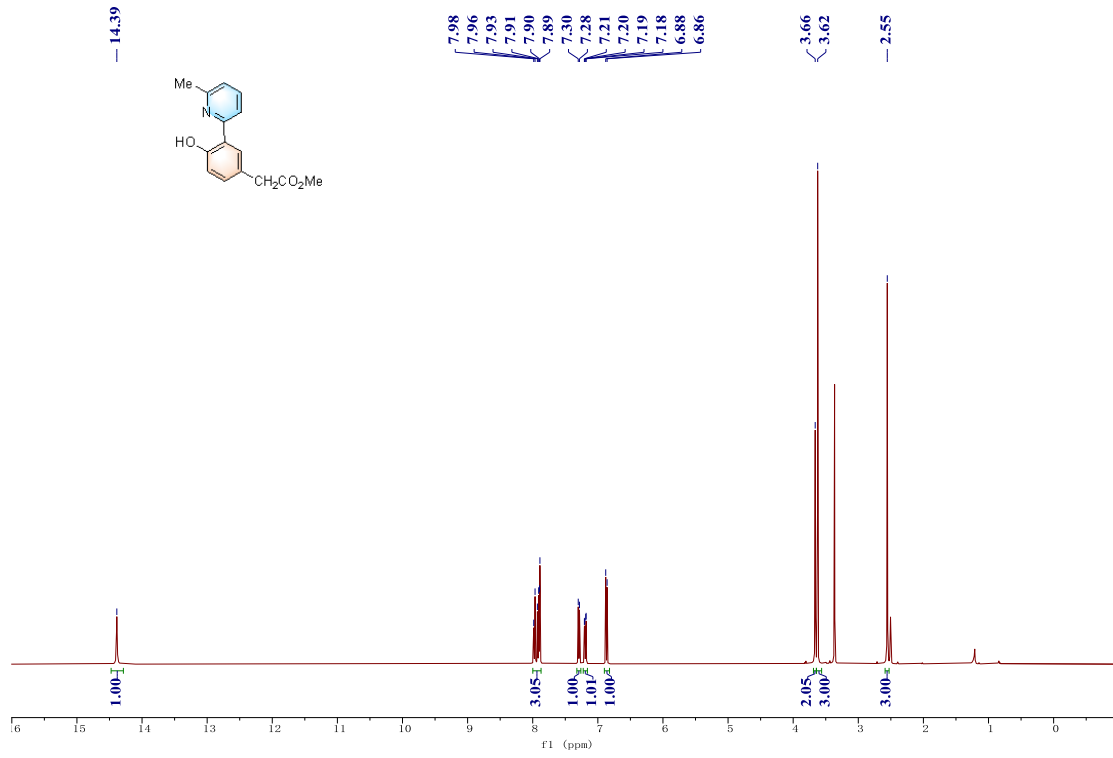

<sup>1</sup>H NMR spectrum of 3m

HN-77.2.Fid

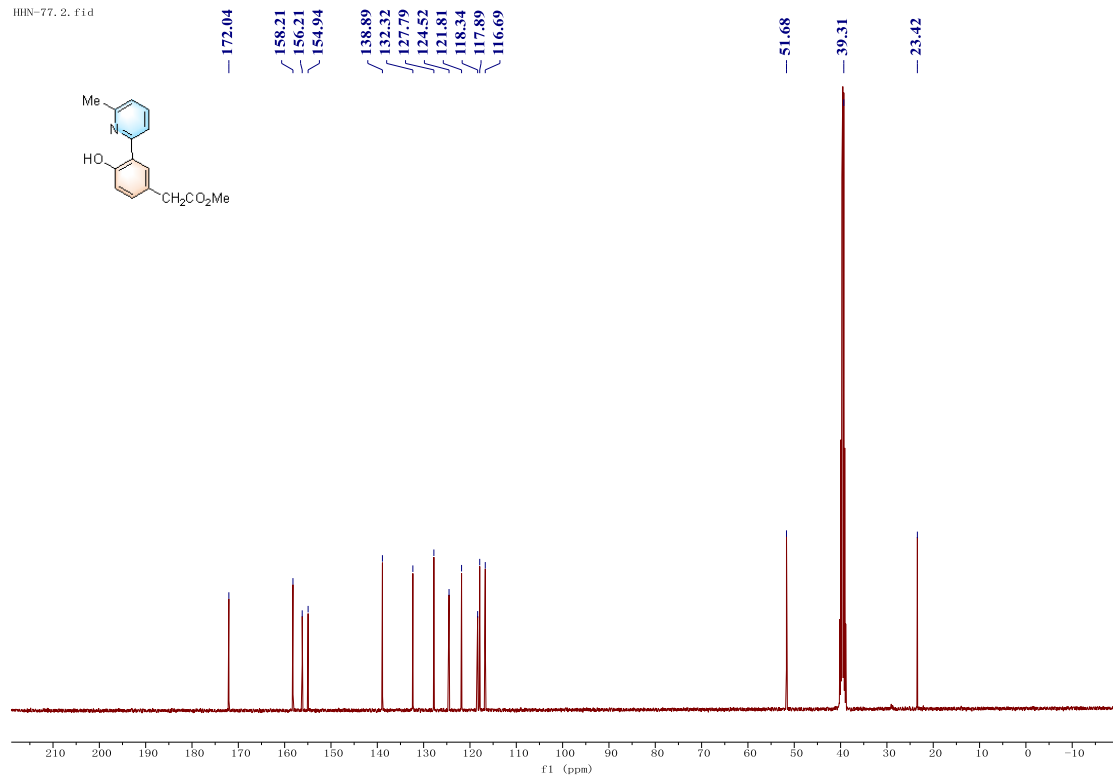

<sup>13</sup>C NMR spectrum of 3m

HN-30.2. F1d

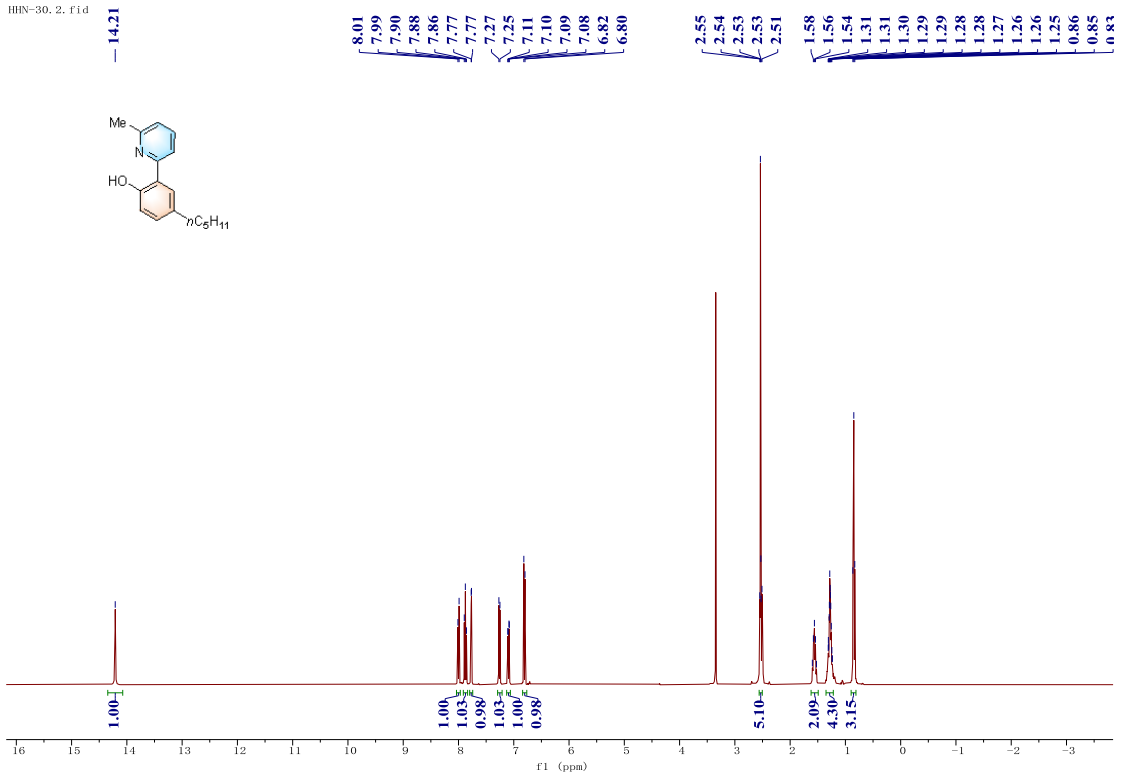

<sup>1</sup>H NMR spectrum of 3n

HN-30.3. F1d

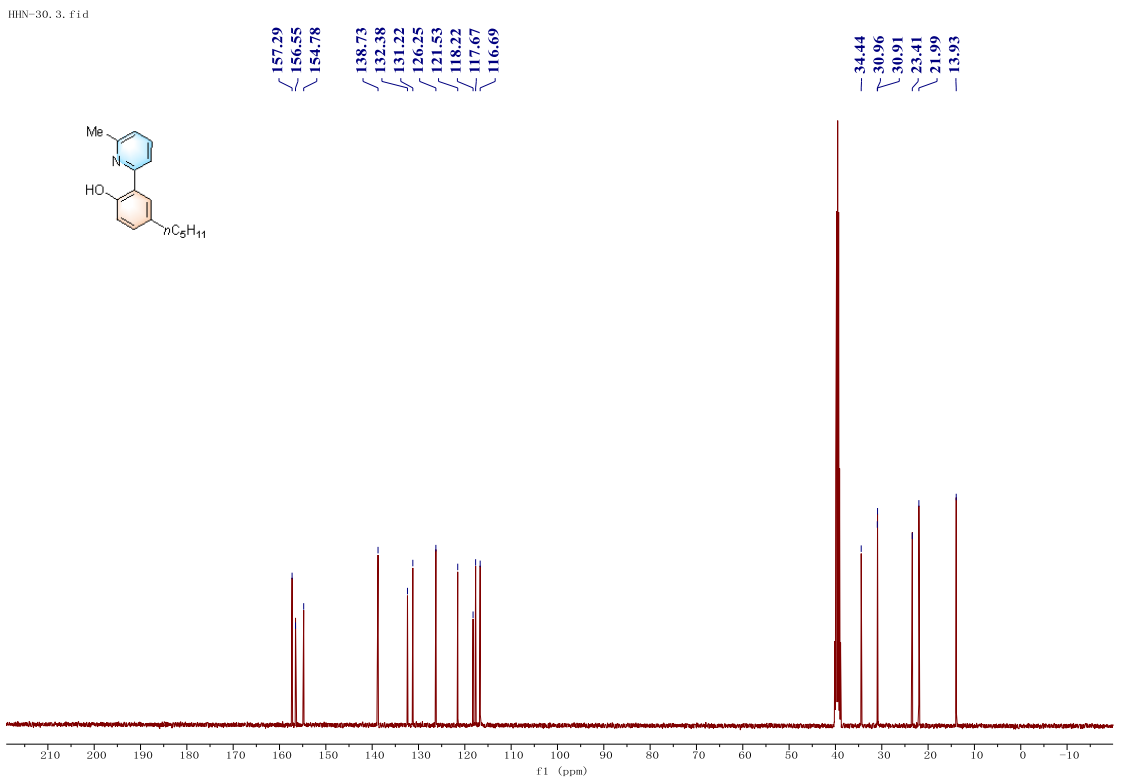

<sup>13</sup>C NMR spectrum of 3n

HN-85.10.fid

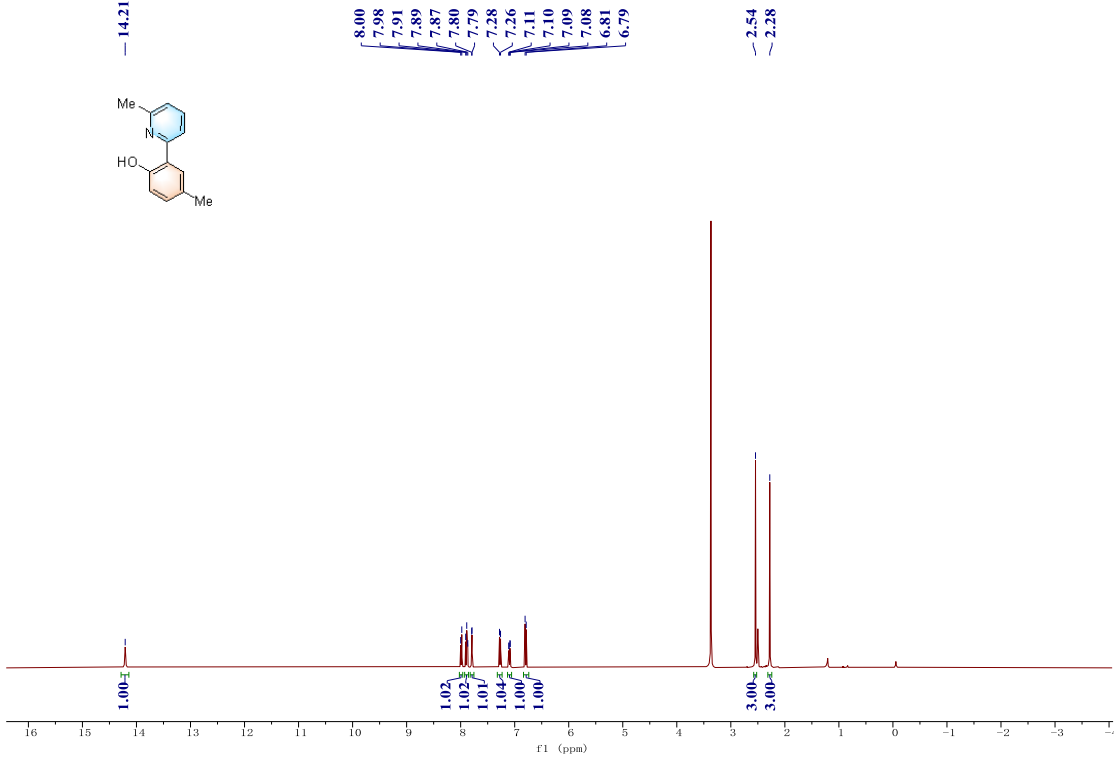

<sup>1</sup>H NMR spectrum of 3o

HN-85.11.fid

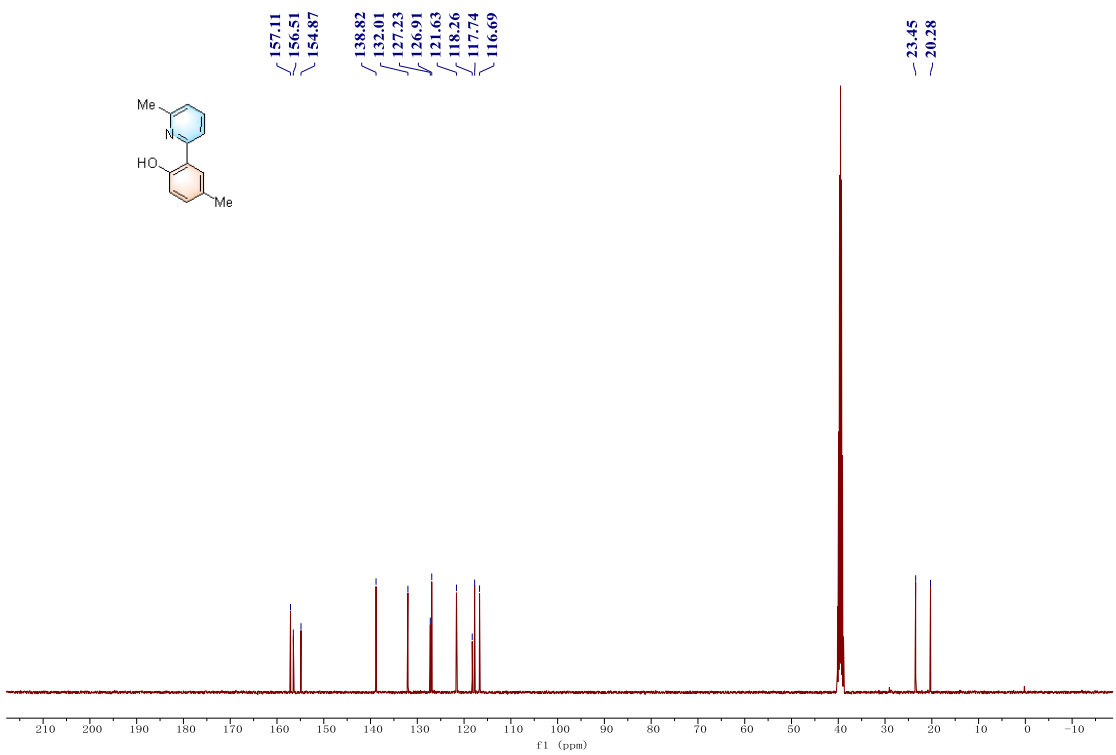

<sup>13</sup>C NMR spectrum of 3o

HN-88.1.fid

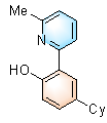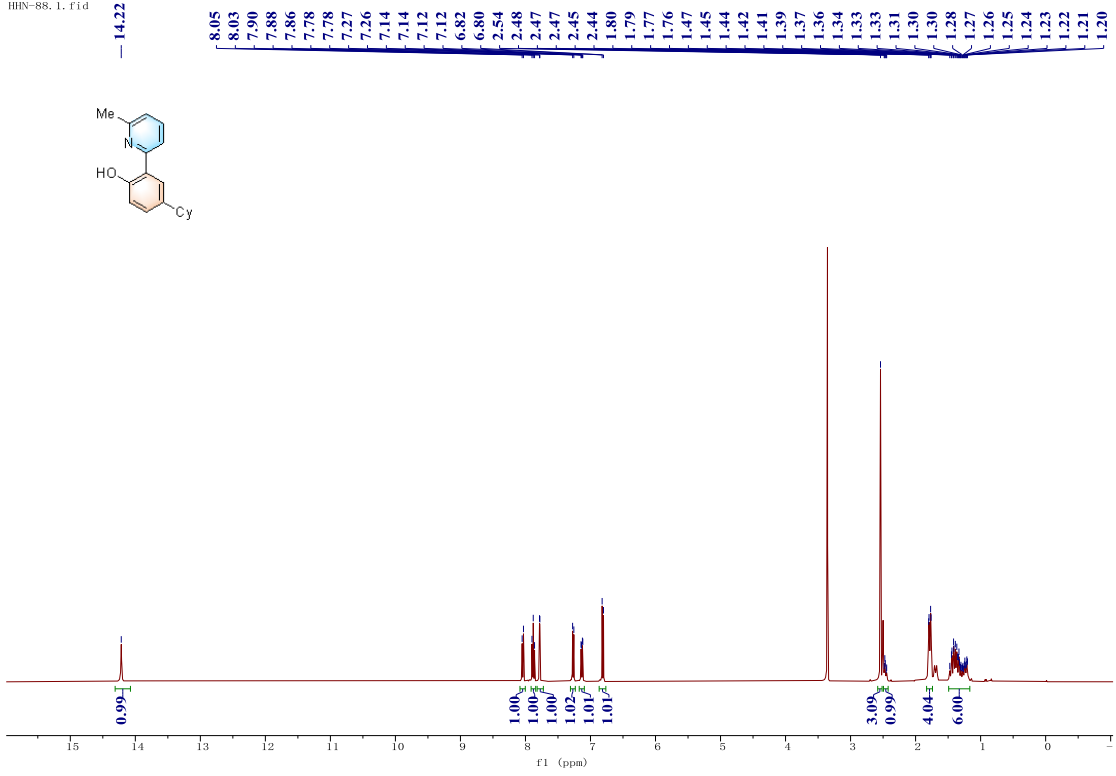

<sup>1</sup>H NMR spectrum of 3p

HN-88.2.fid

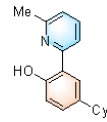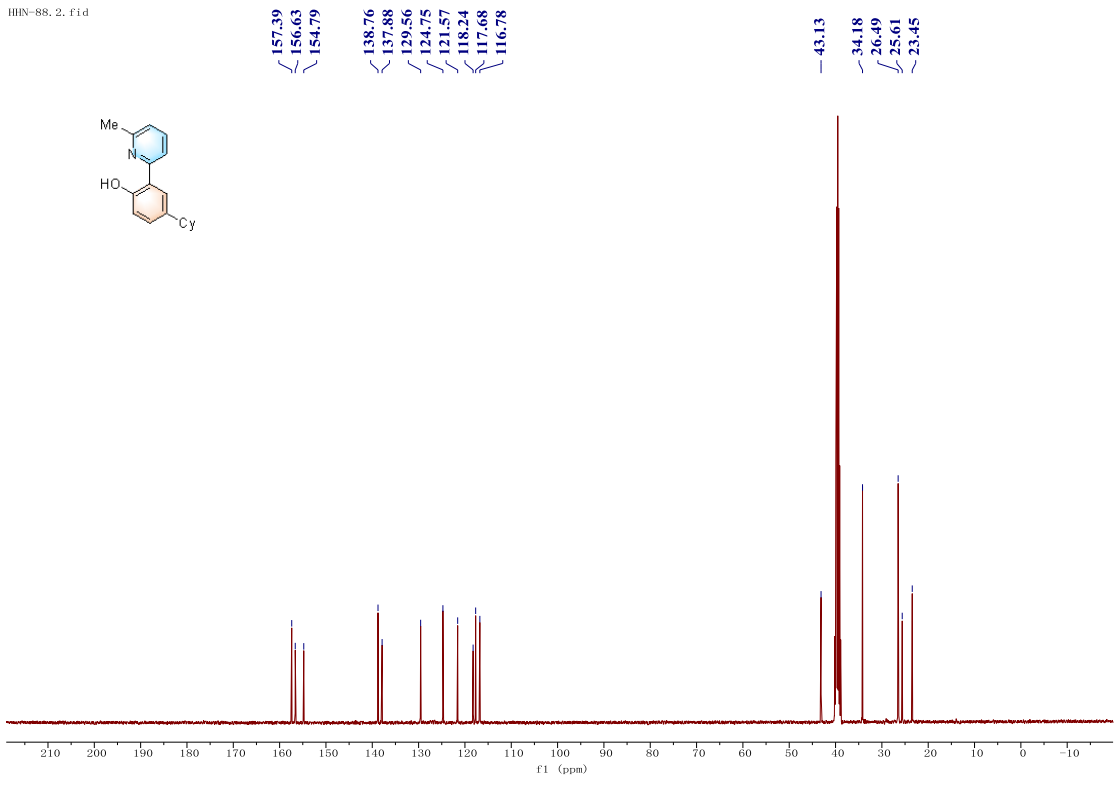

<sup>13</sup>C NMR spectrum of 3p



HN-44.10.fid

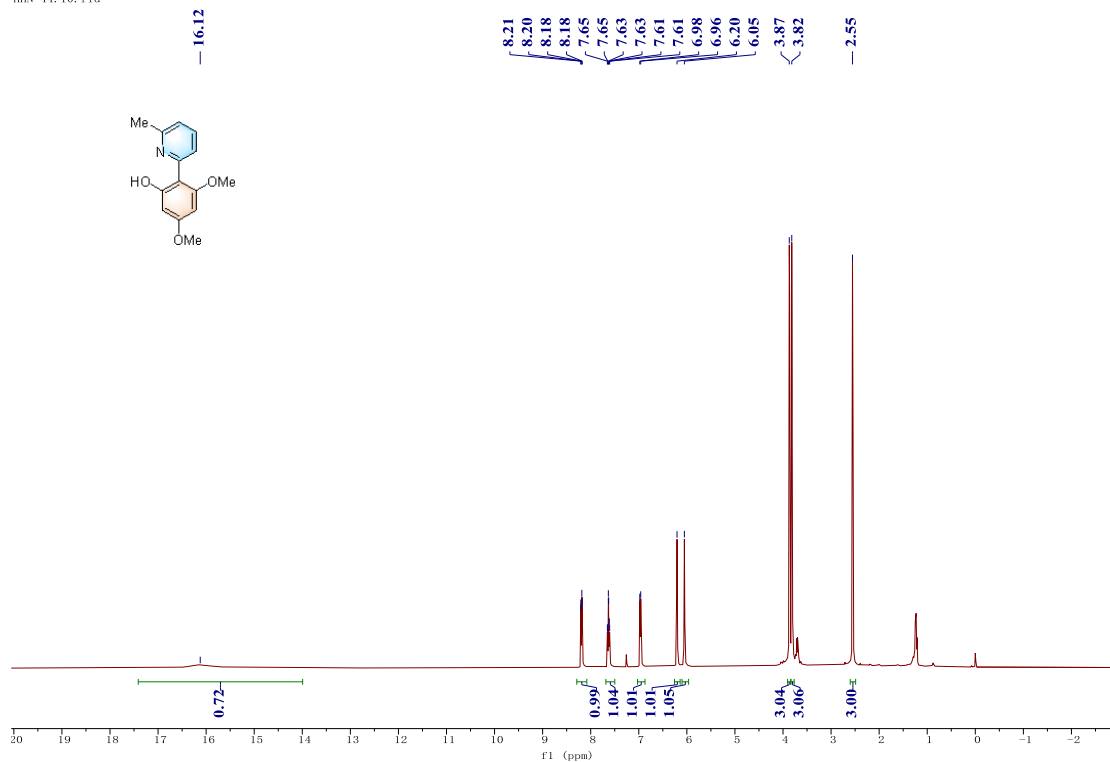

$^1\text{H}$  NMR spectrum of 3q

HN-44.2.fid

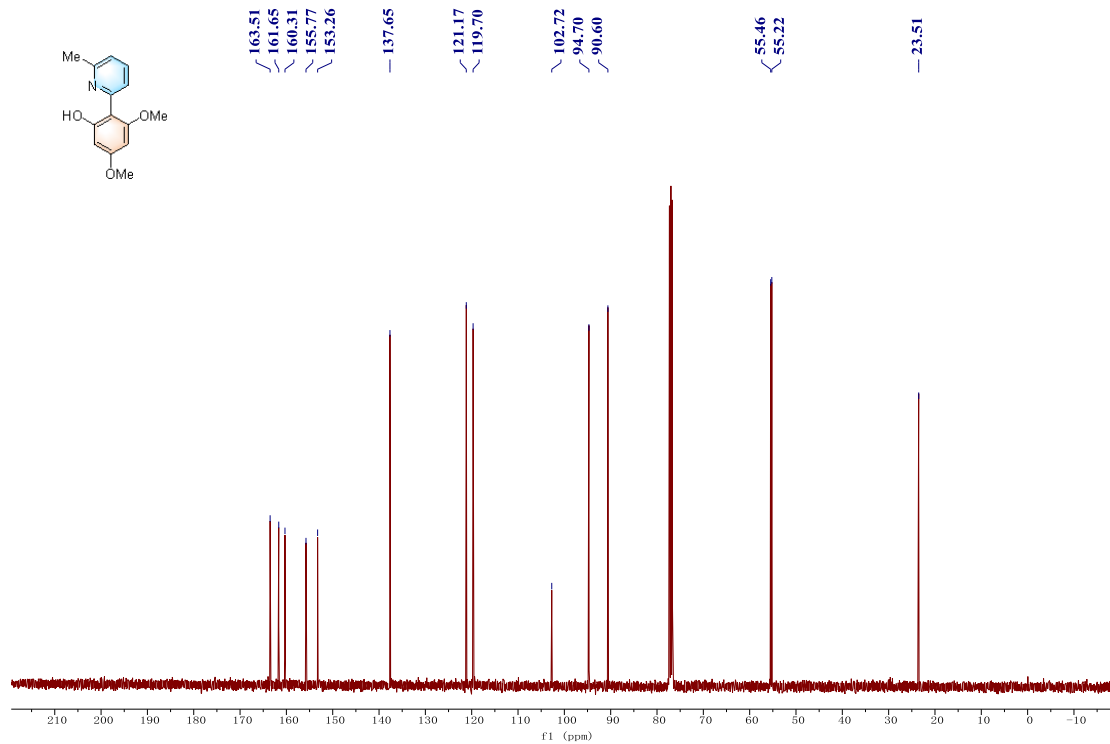

$^{13}\text{C}$  NMR spectrum of 3q

HN-86.1.fid

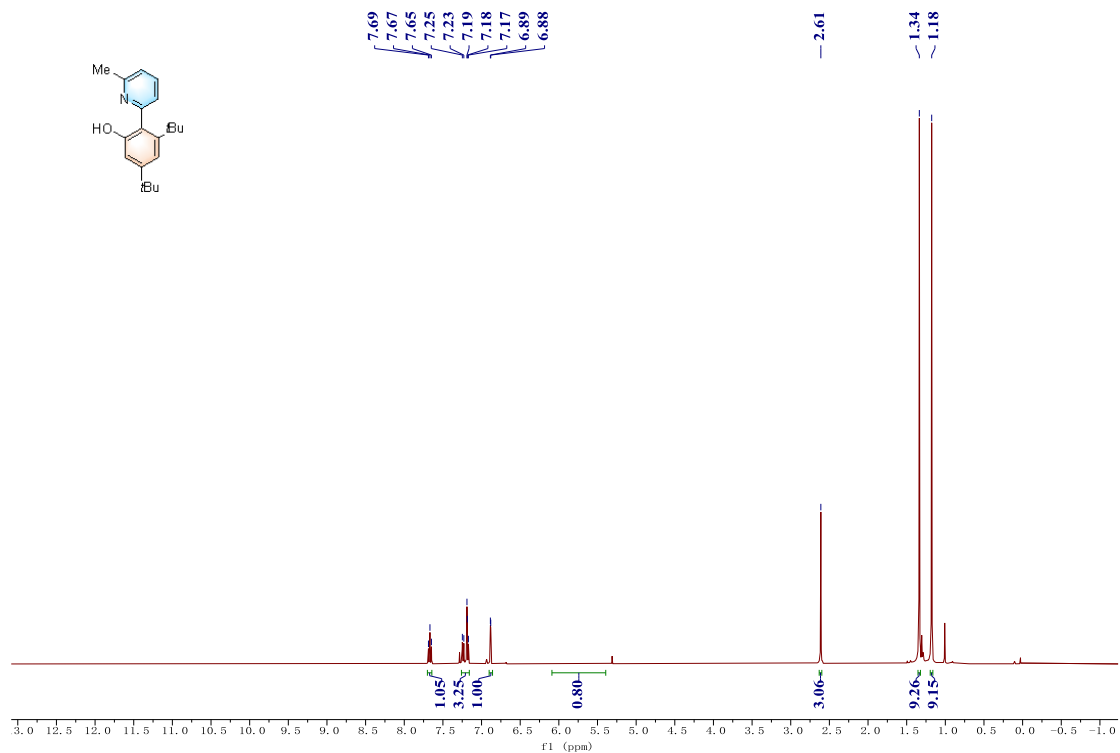

**<sup>1</sup>H NMR spectrum of 3r**

HN-86.2.fid

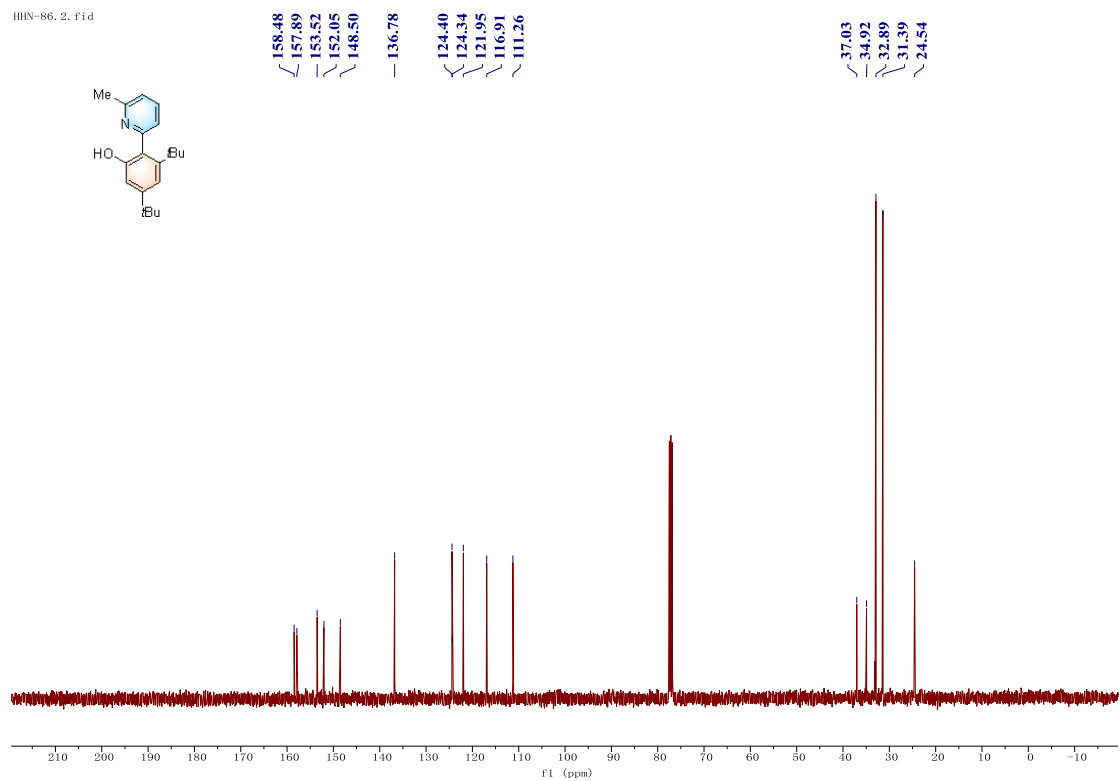

**<sup>13</sup>C NMR spectrum of 3r**

HN-20.1.Fid

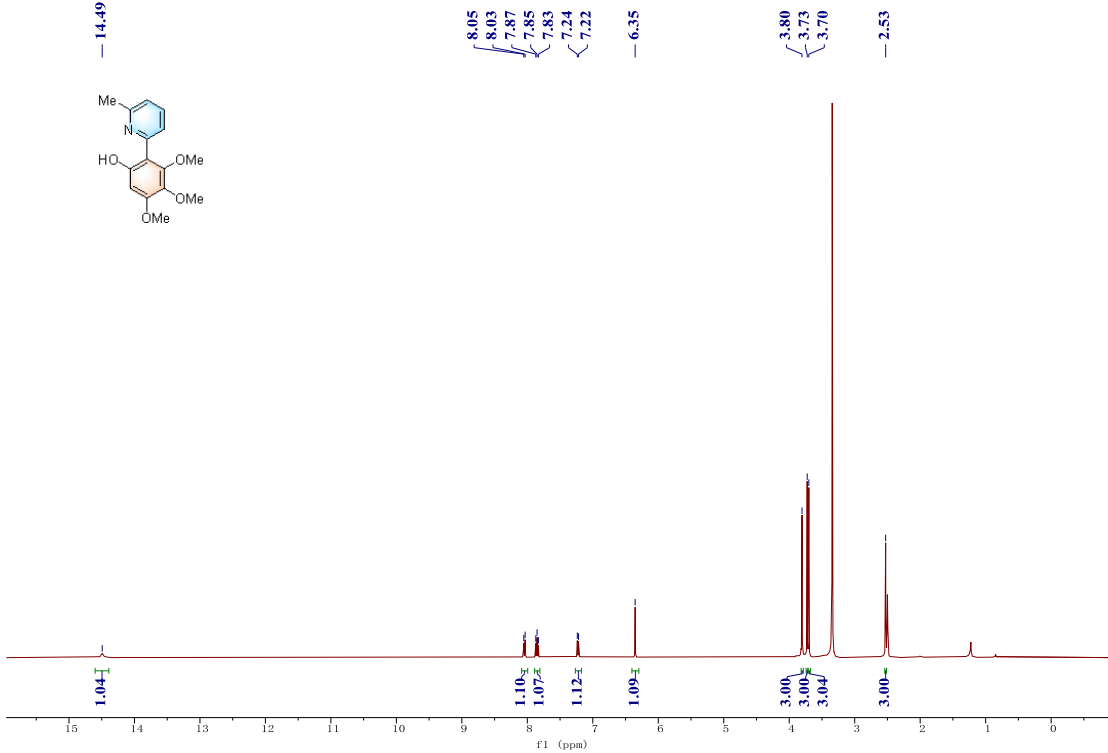

<sup>1</sup>H NMR spectrum of 3s

HN-20.2.Fid

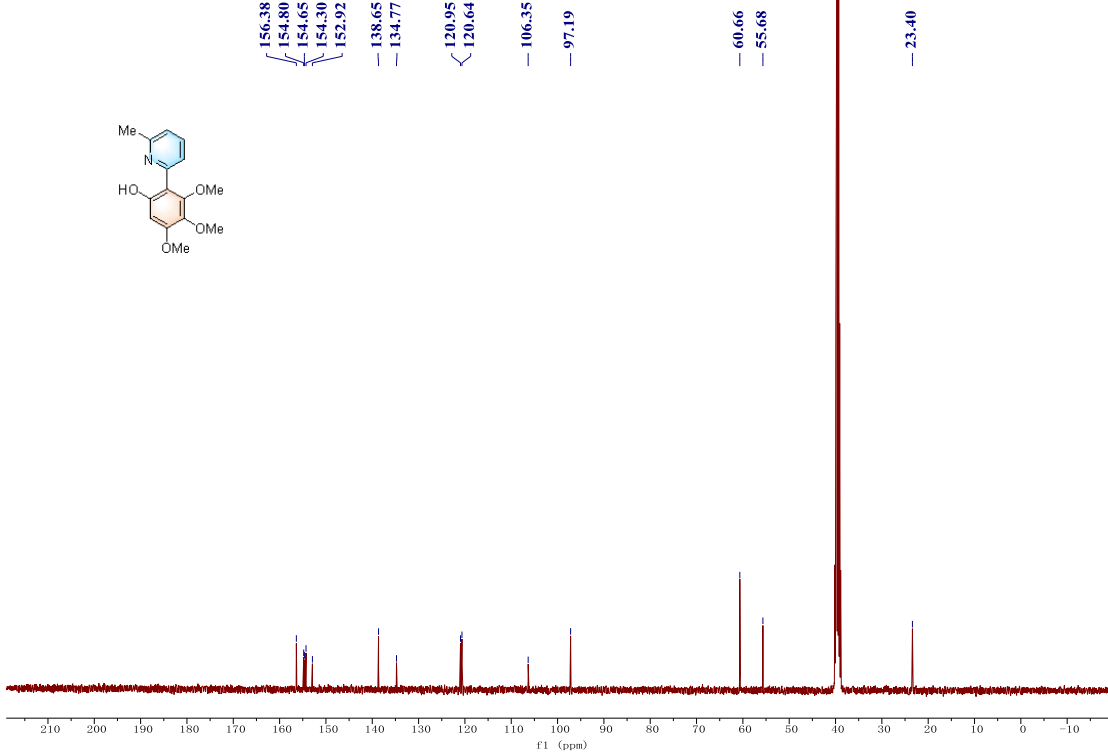

<sup>13</sup>C NMR spectrum of 3s

HN-90.3.fid

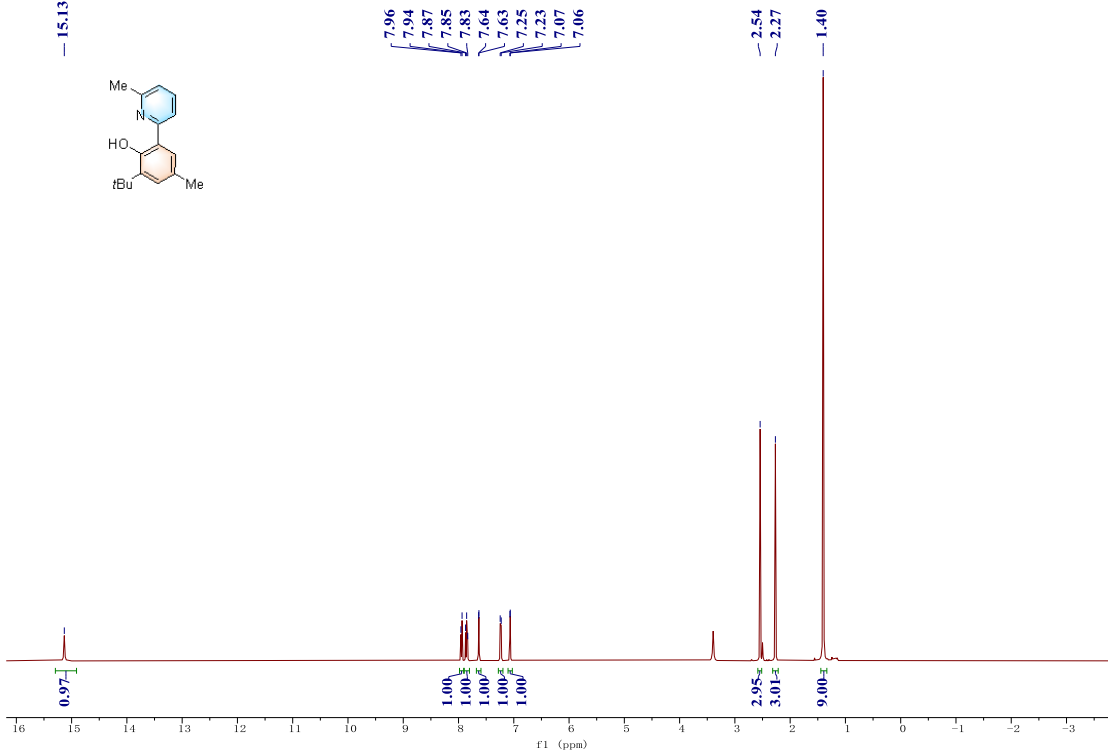

<sup>1</sup>H NMR spectrum of 3t

HN-90.4.fid

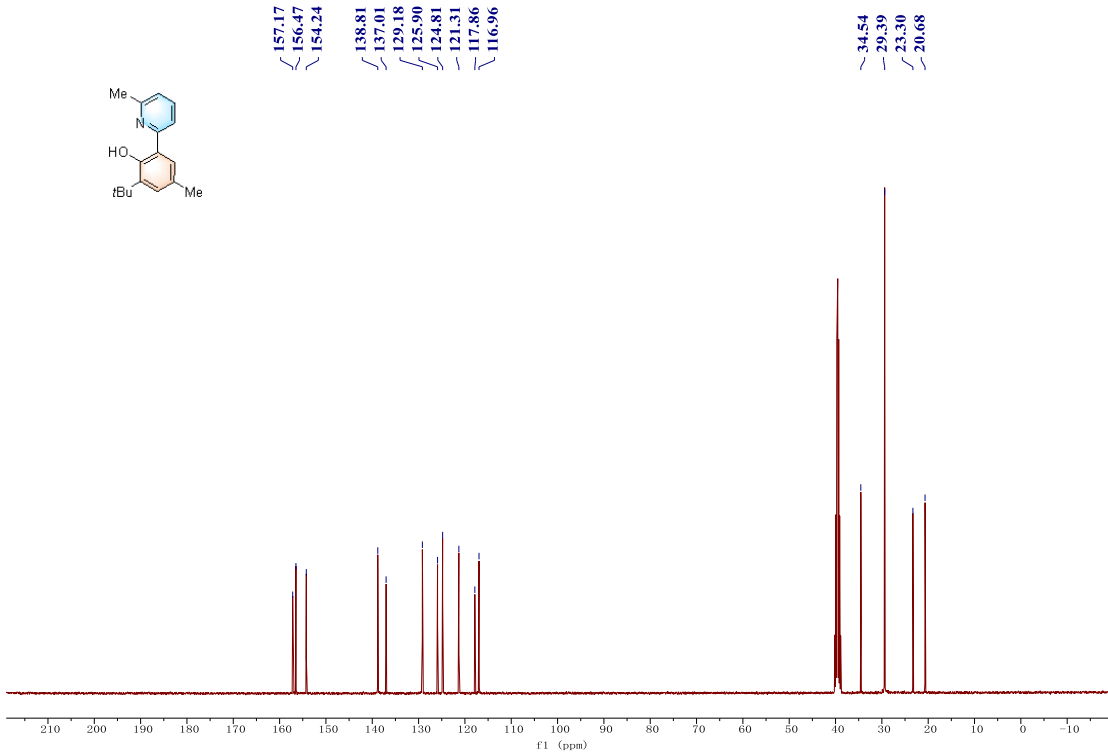

<sup>13</sup>C NMR spectrum of 3t

HN-128.1.fid

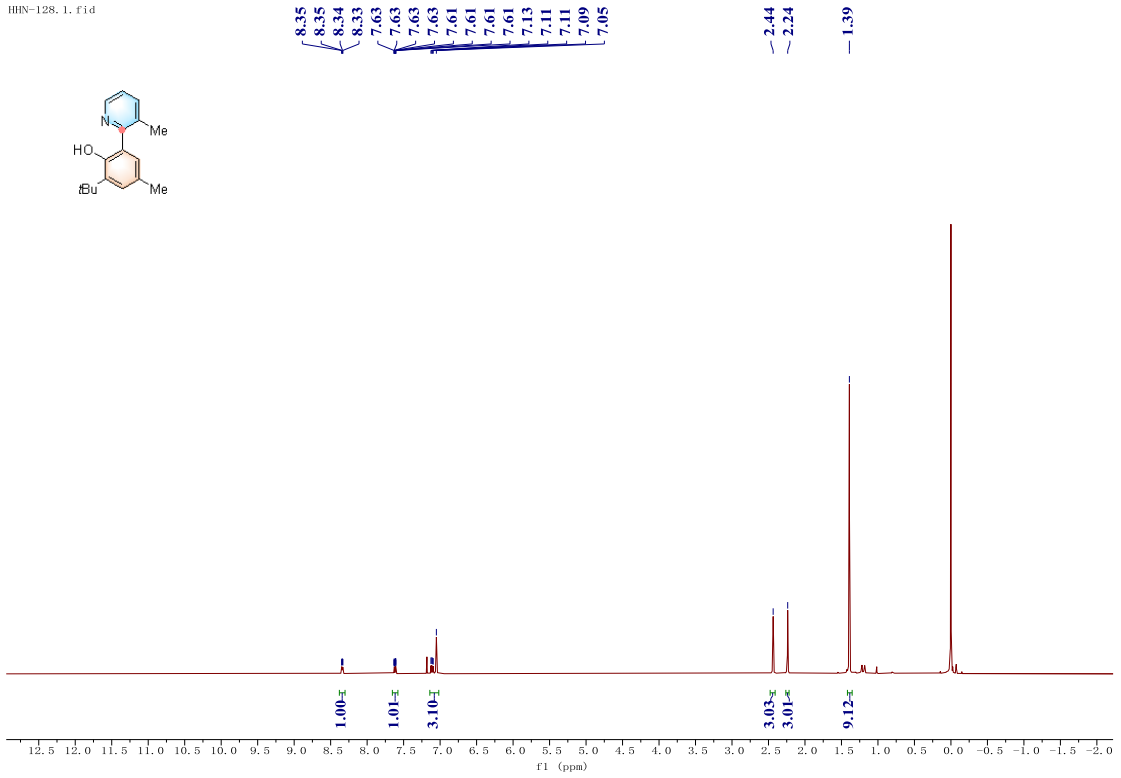

$^1\text{H}$  NMR spectrum of 4a

HN-128.2.fid

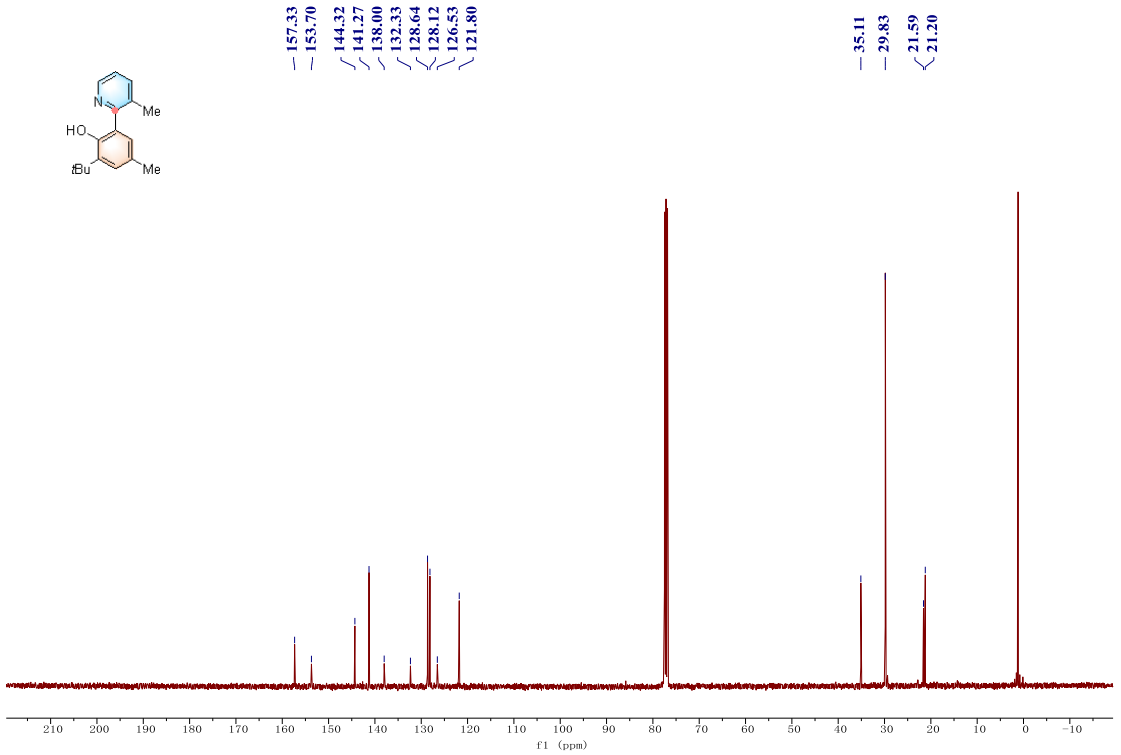

$^{13}\text{C}$  NMR spectrum of 4a

HN-117.1.fid

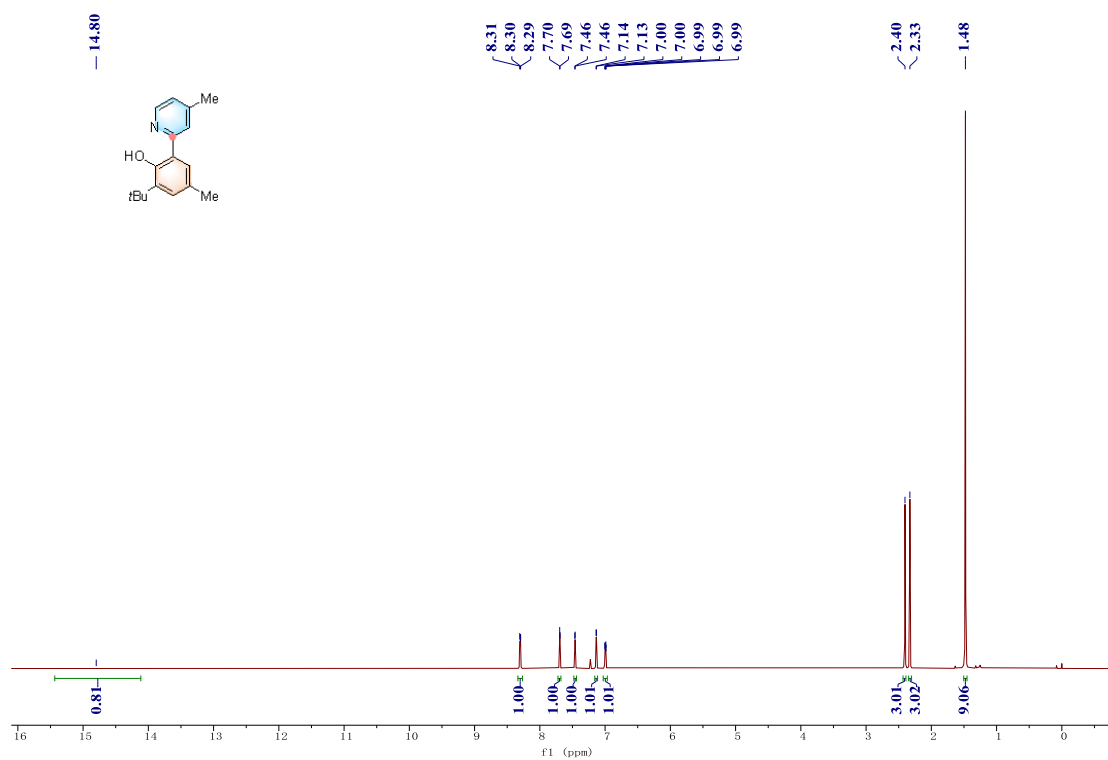

$^1\text{H}$  NMR spectrum of 4b

HN-117.2.fid

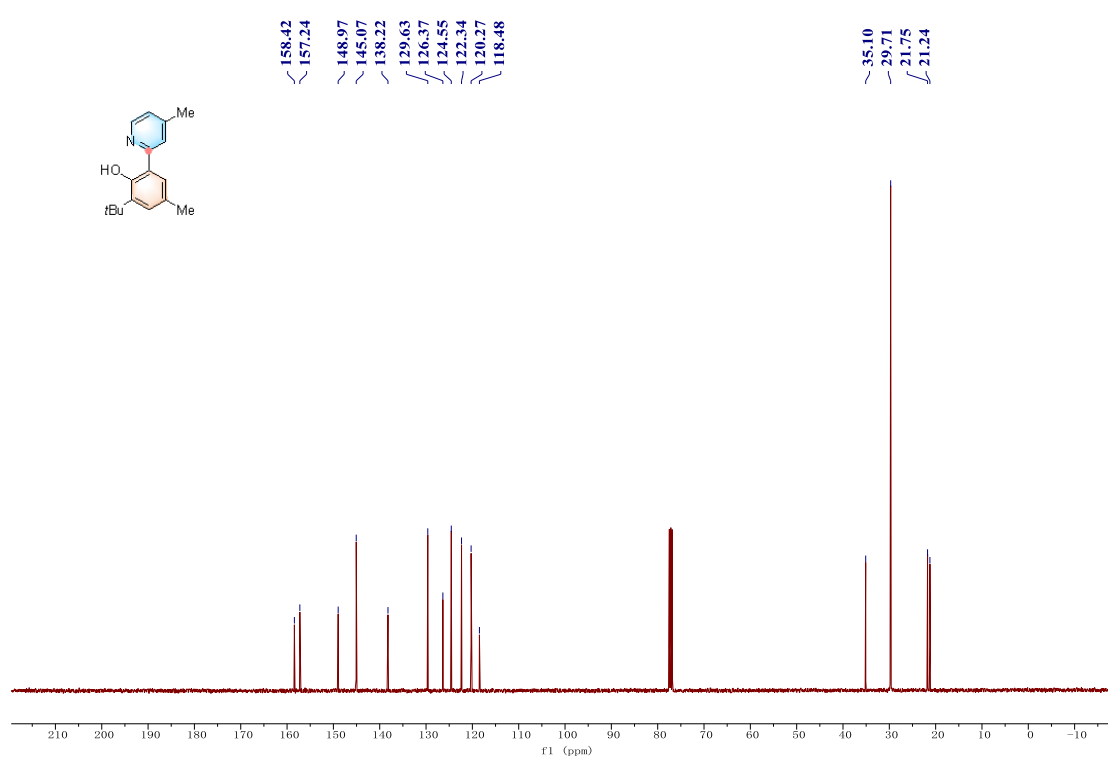

$^{13}\text{C}$  NMR spectrum of 4b

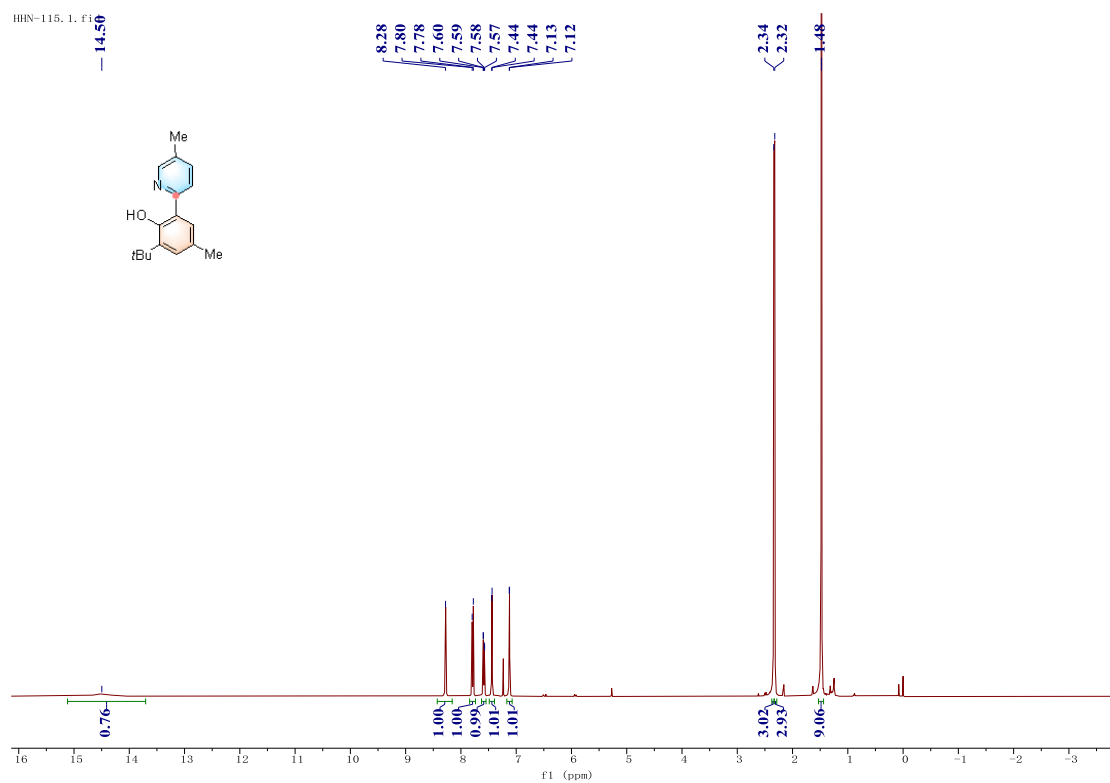

<sup>1</sup>H NMR spectrum of 4c

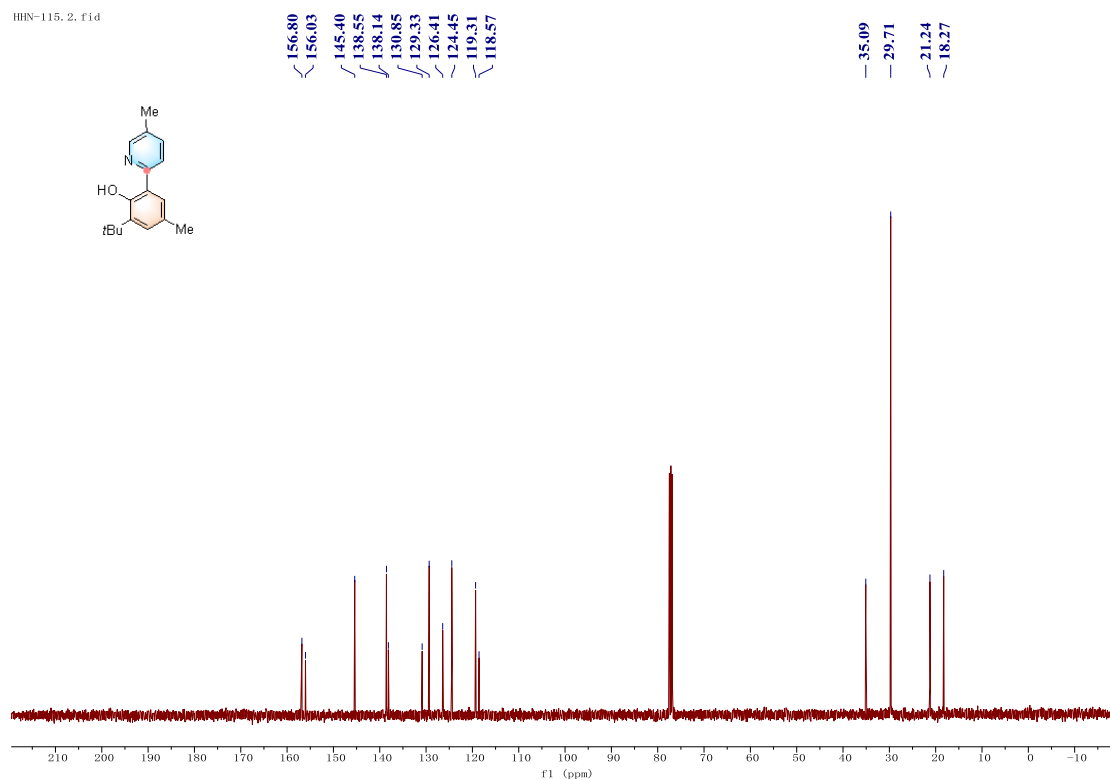

<sup>13</sup>C NMR spectrum of 4c

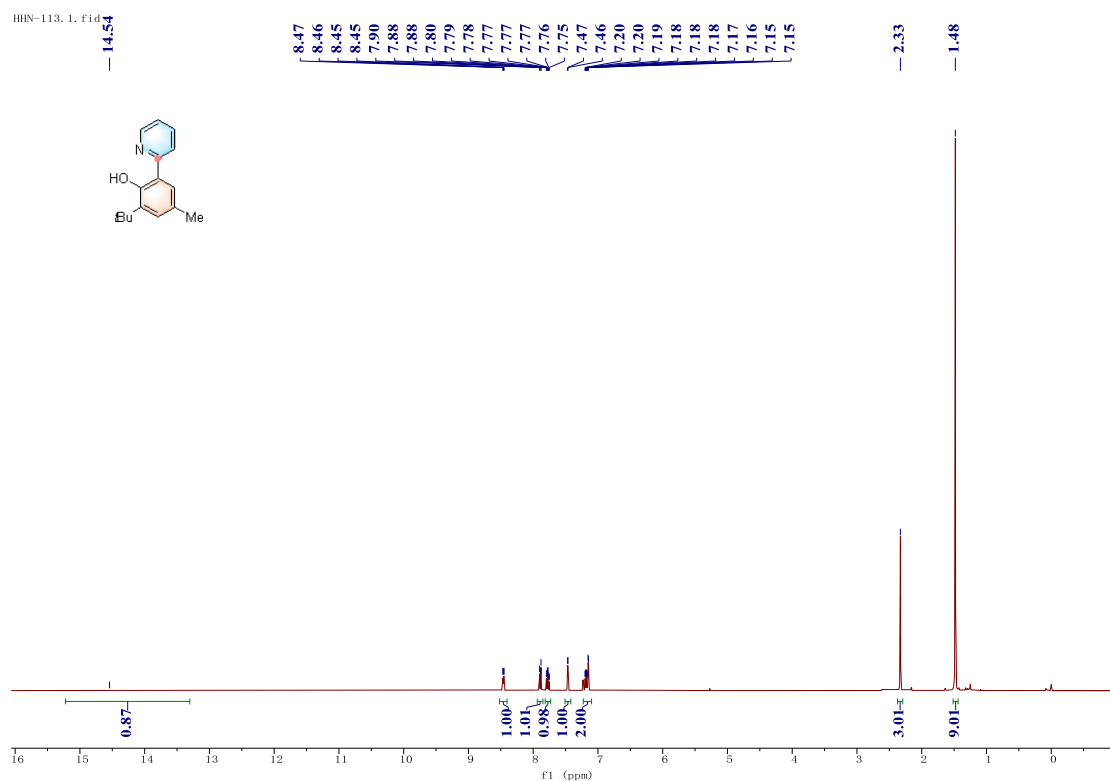

<sup>1</sup>H NMR spectrum of 4d

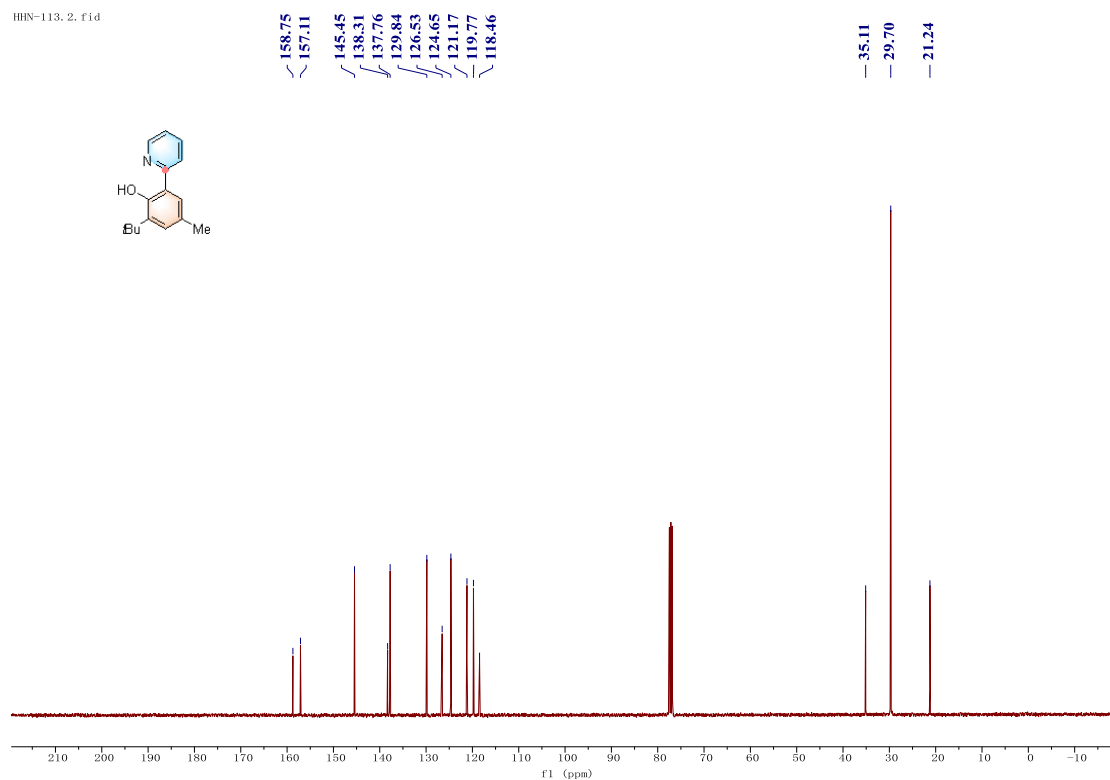

<sup>13</sup>C NMR spectrum of 4d



HN-148, 10, fid

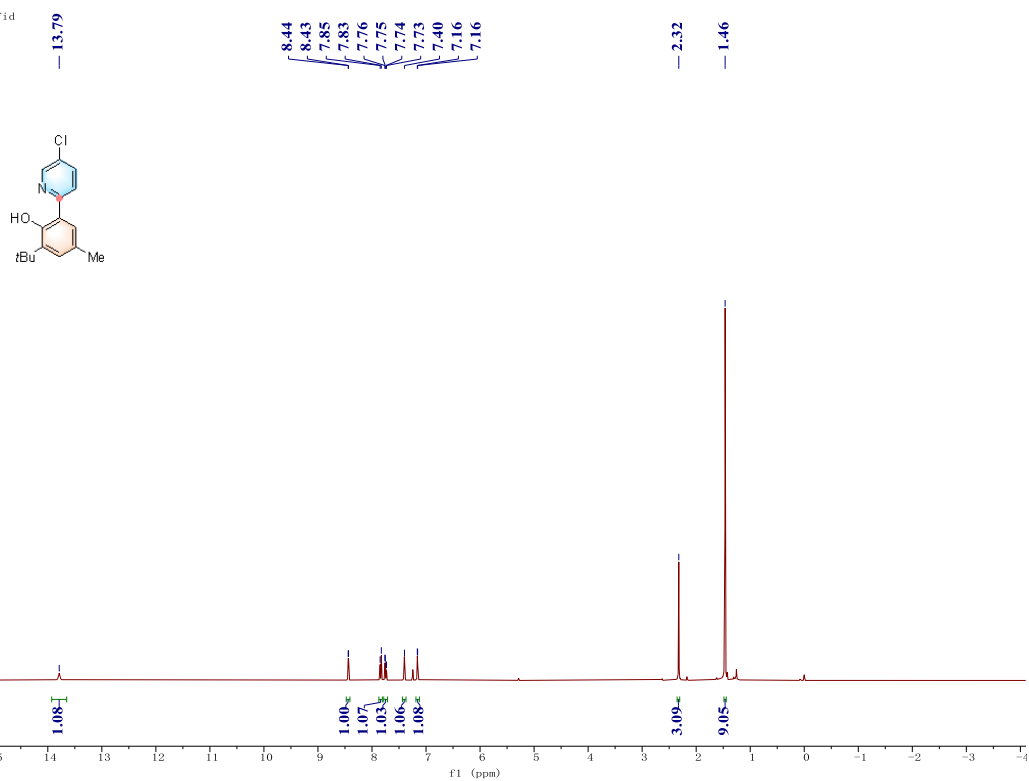

<sup>1</sup>H NMR spectrum of 4e

HN-148, 11, fid

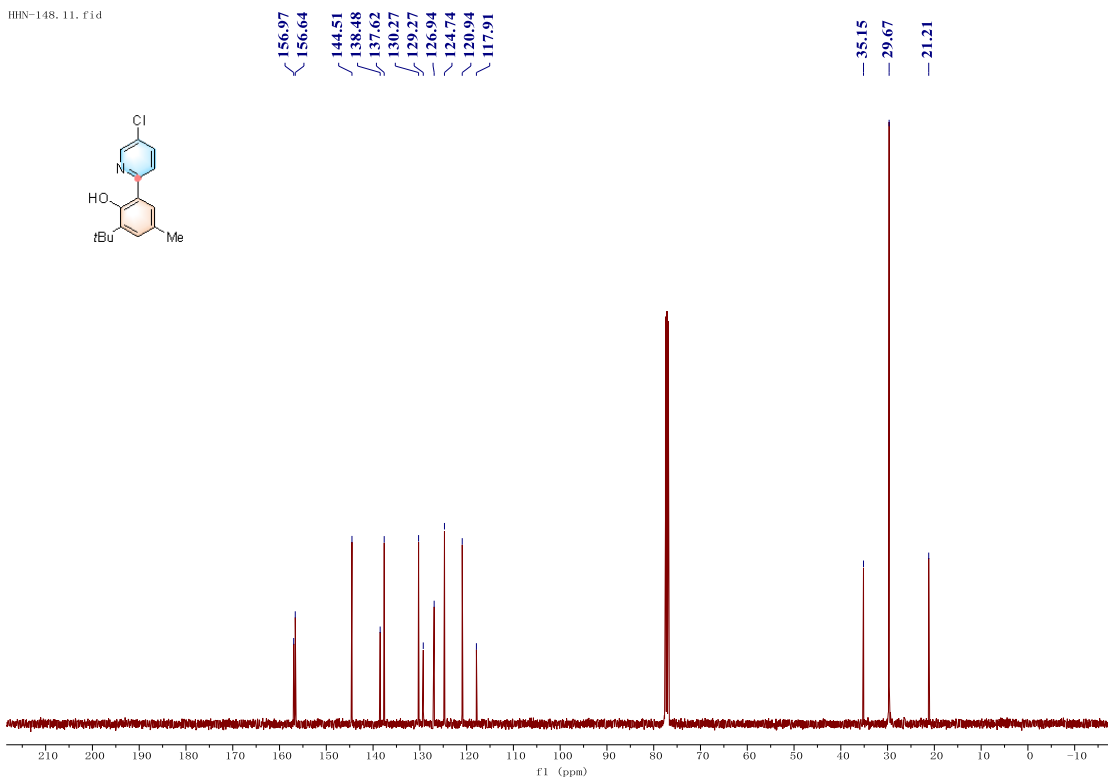

<sup>13</sup>C NMR spectrum of 4e

HN-137.1.fid

13.78

8.35  
8.35  
7.92  
7.91  
7.90  
7.89  
7.89  
7.57  
7.56  
7.55  
7.54  
7.54  
7.54  
7.52  
7.52  
7.40  
7.40  
7.15

2.33

1.47

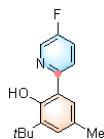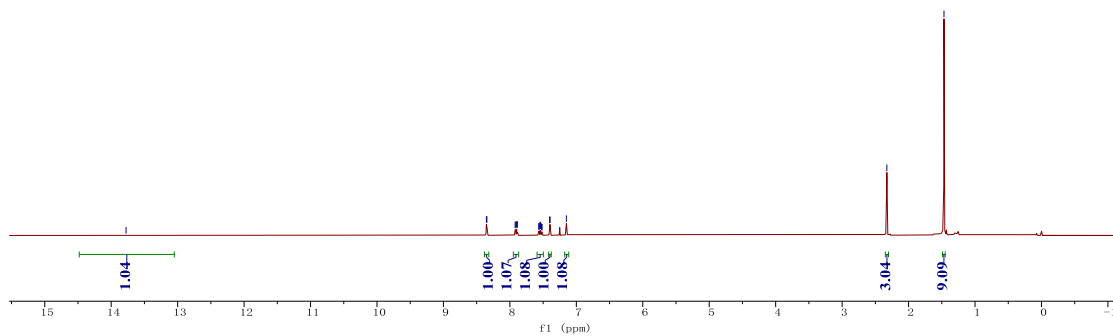

<sup>1</sup>H NMR spectrum of 4f

HN-137.2.fid

159.06  
156.53  
156.13  
155.33  
155.29  
138.42  
133.76  
133.50  
129.83  
126.91  
125.35  
125.16  
124.76  
121.48  
121.43  
118.23

35.15

29.68

21.22

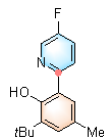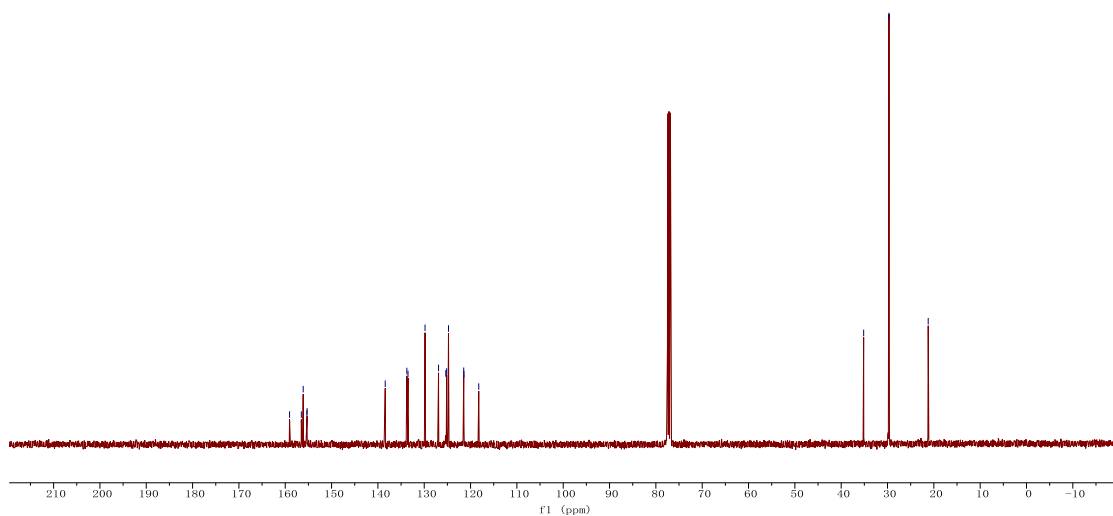

<sup>13</sup>C NMR spectrum of 4f

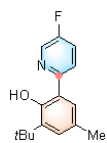

-129.17

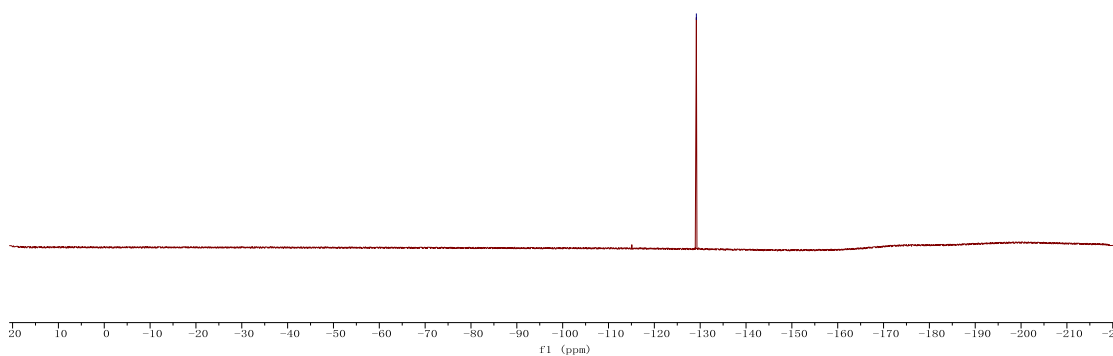

$^{19}\text{F}$  NMR spectrum of 4f

HN-132a. 1. fid

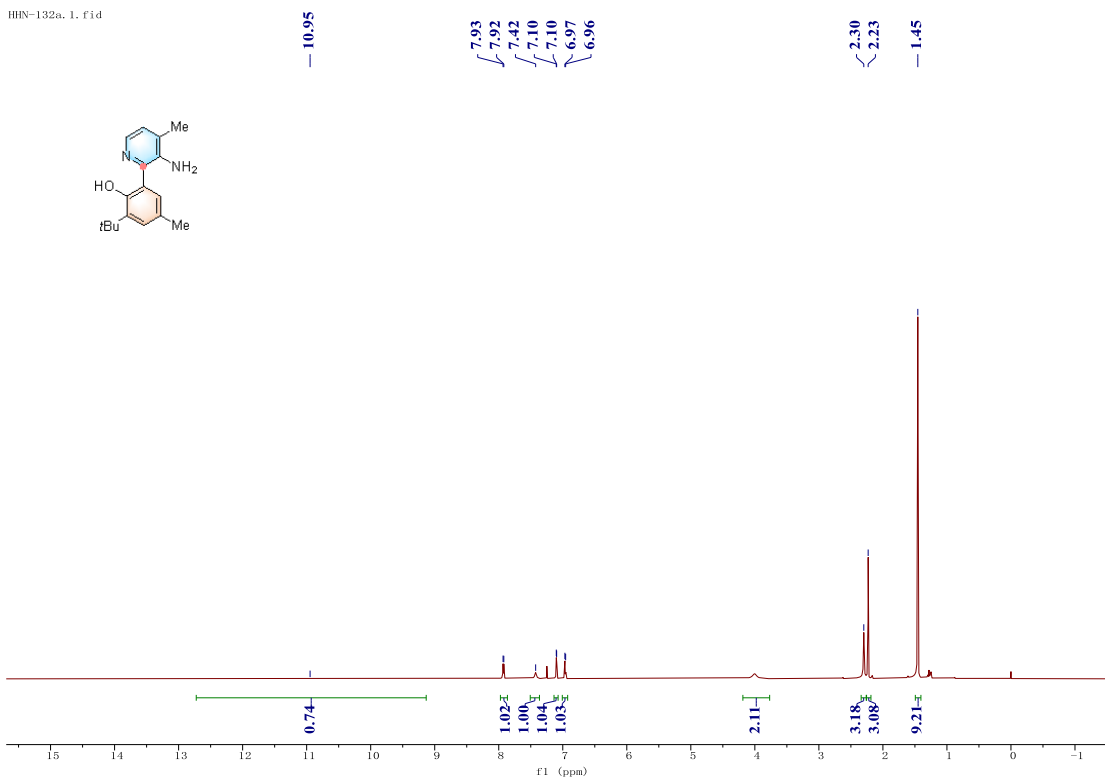

<sup>1</sup>H NMR spectrum of 4g

HN-132a. 2. fid

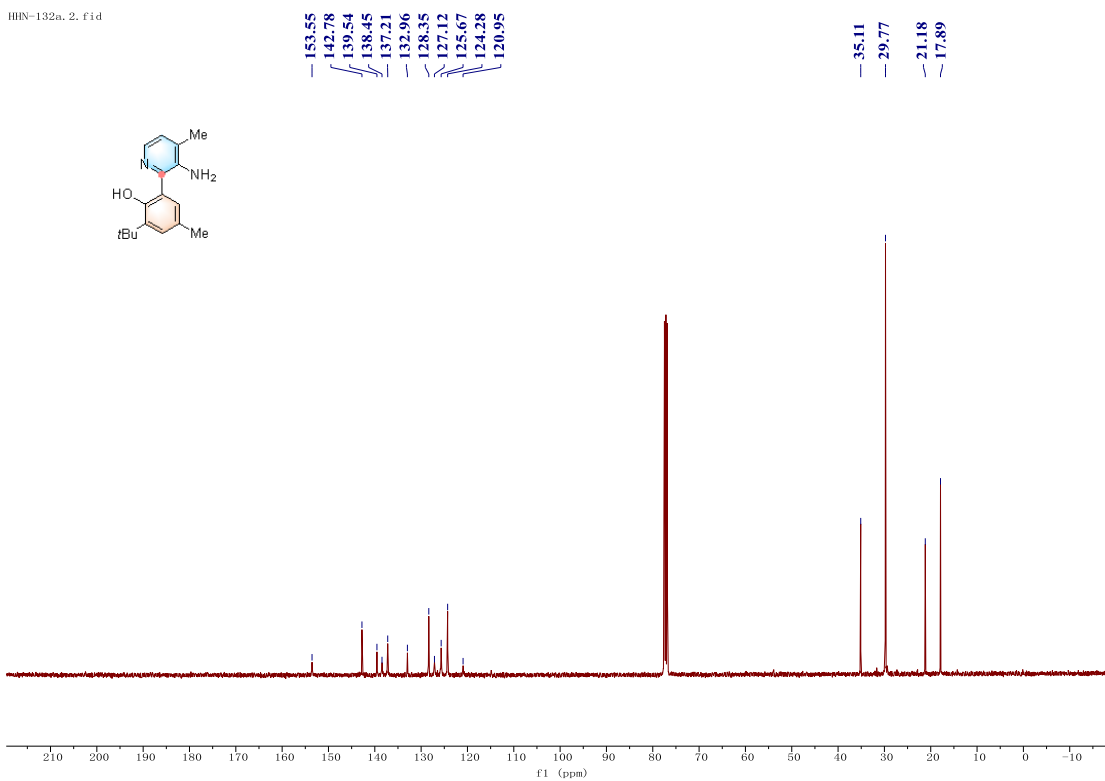

<sup>13</sup>C NMR spectrum of 4g

HN-129.1.fid

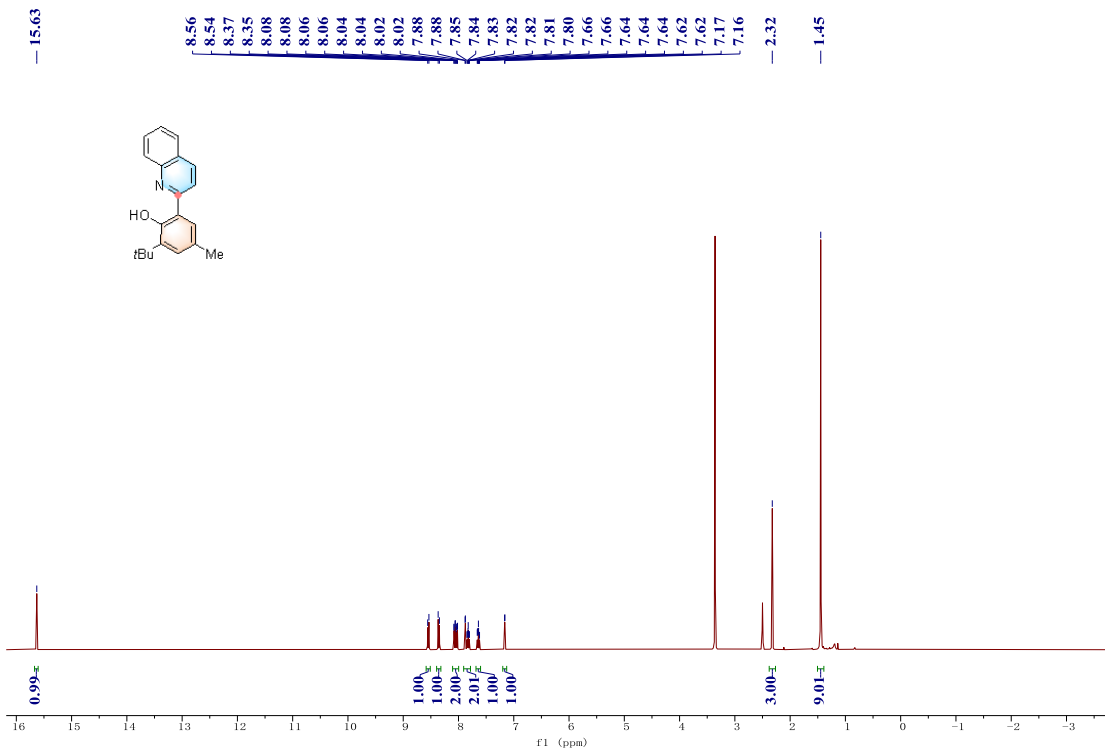

<sup>1</sup>H NMR spectrum of 4h

HN-129.2.fid

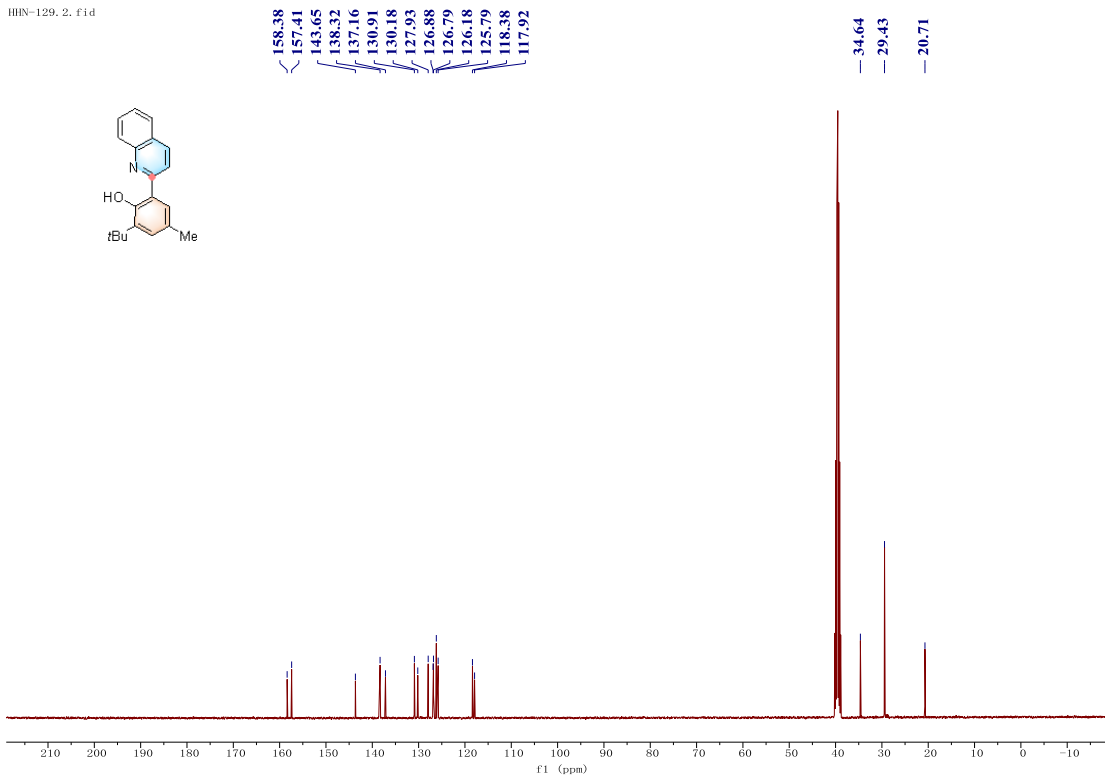

<sup>13</sup>C NMR spectrum of 4h

HN-135.9.fid

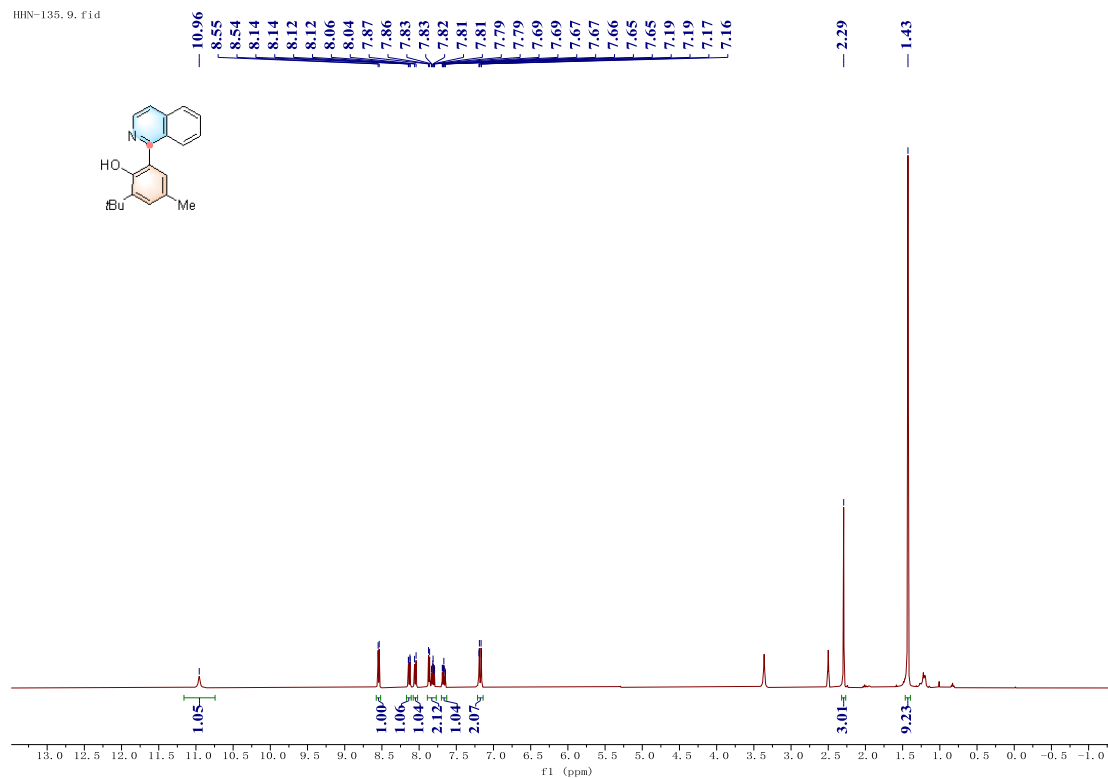

<sup>1</sup>H NMR spectrum of 4i

1s1-20220110.10.fid

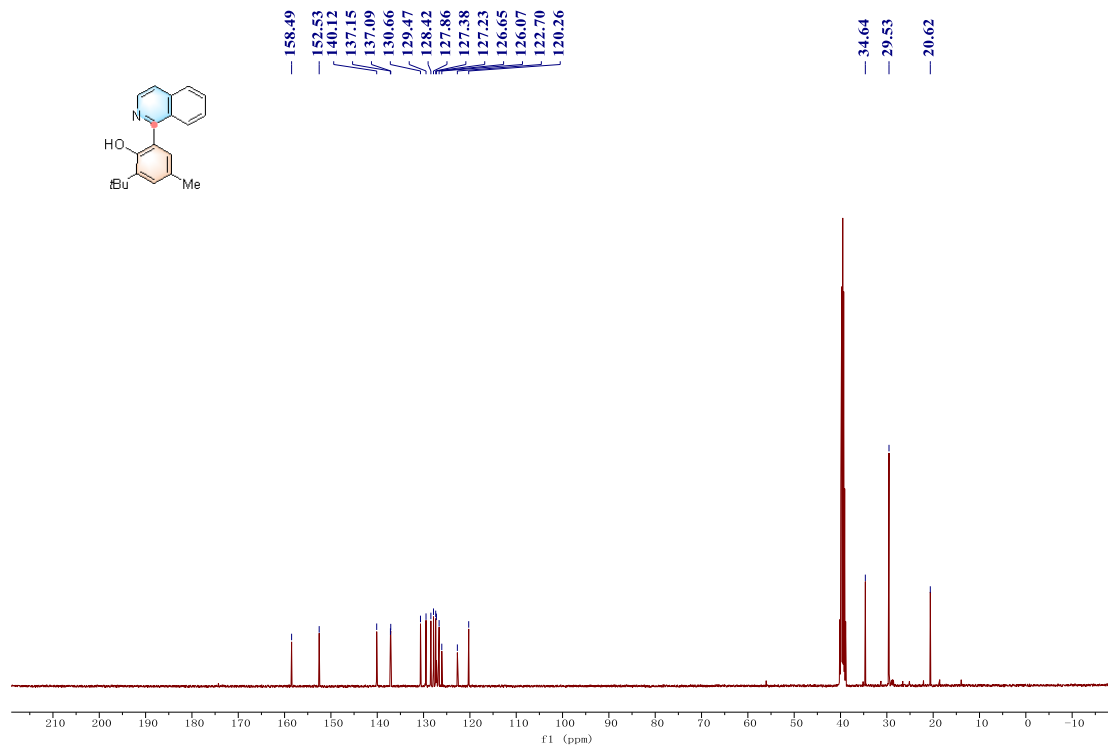

<sup>13</sup>C NMR spectrum of 4i

HN-133, 1. fid

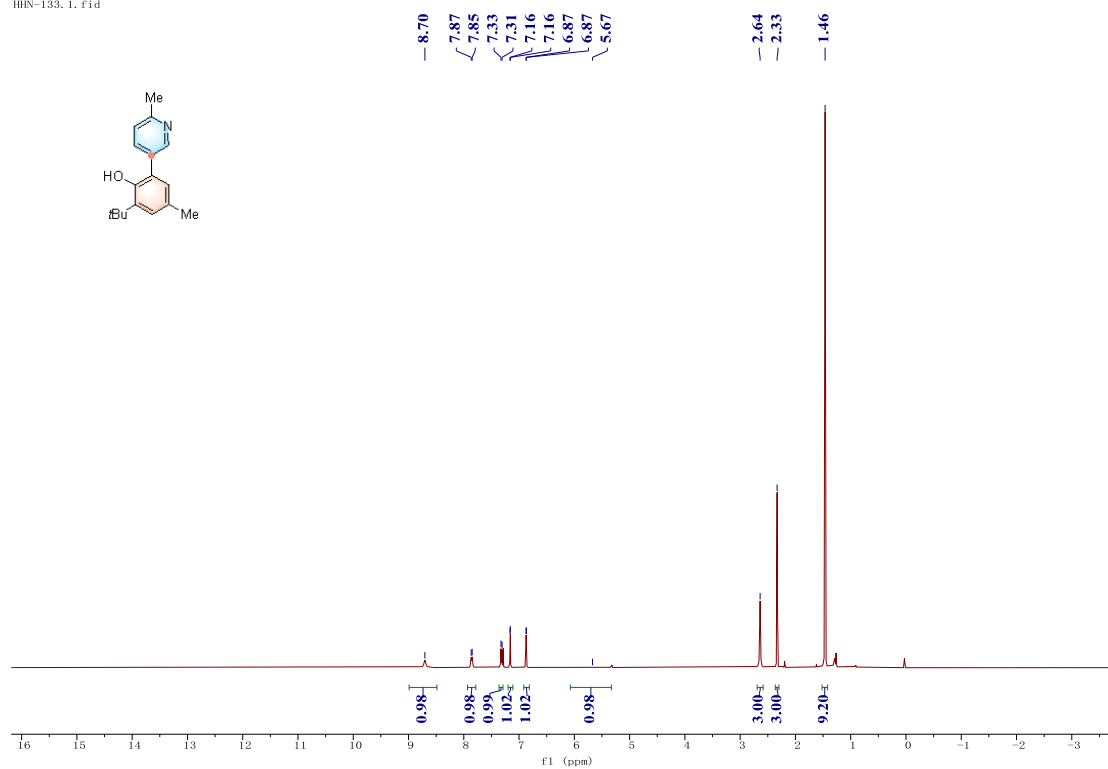

$^1\text{H}$  NMR spectrum of 4j

HN-133, 2. fid

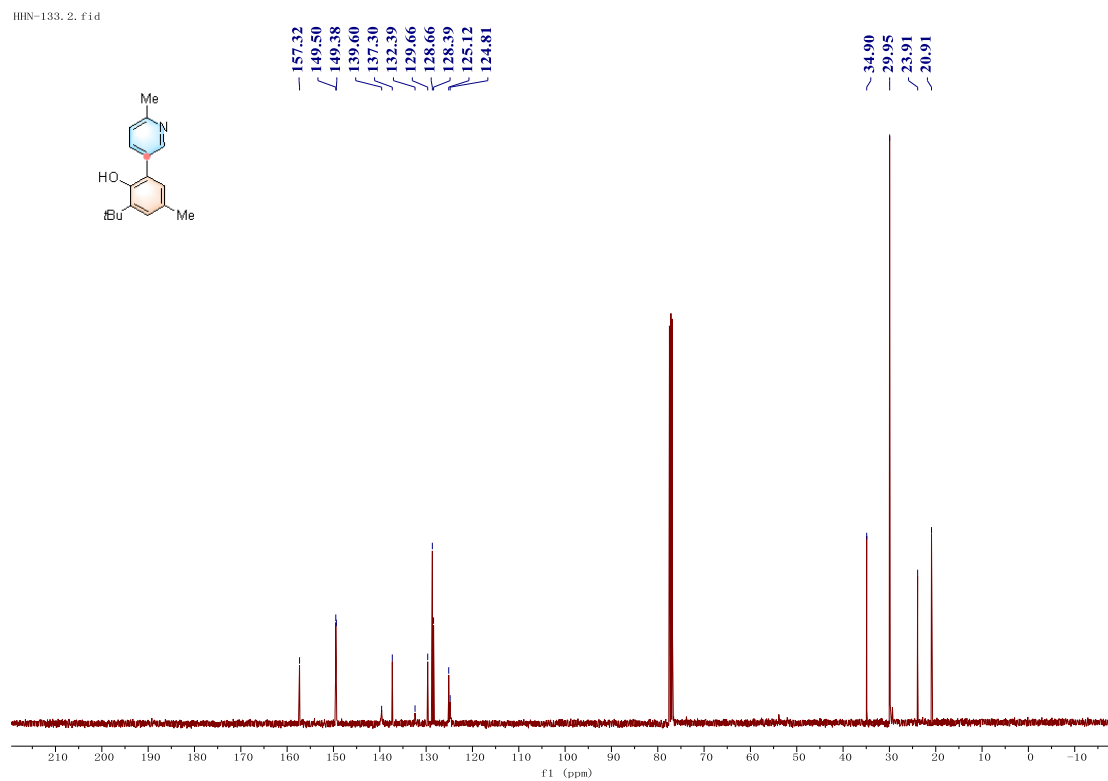

$^{13}\text{C}$  NMR spectrum of 4j

HN-143. 1. fid

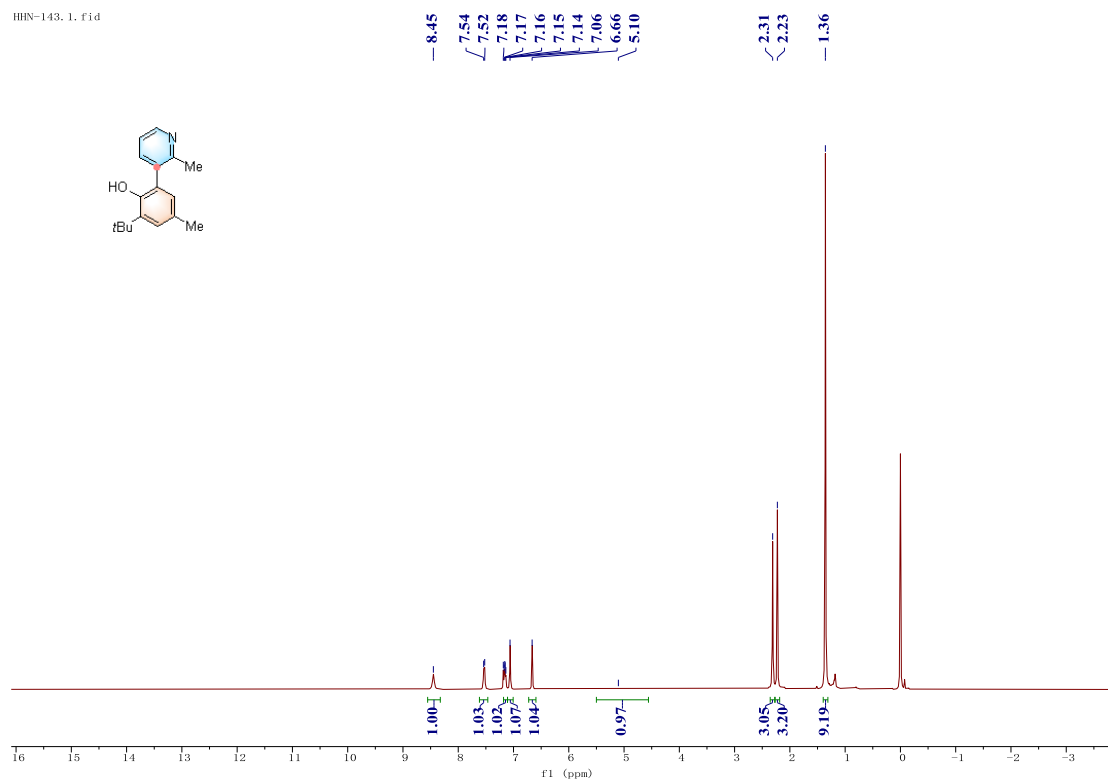

<sup>1</sup>H NMR spectrum of 4k

HN-143. 4. fid

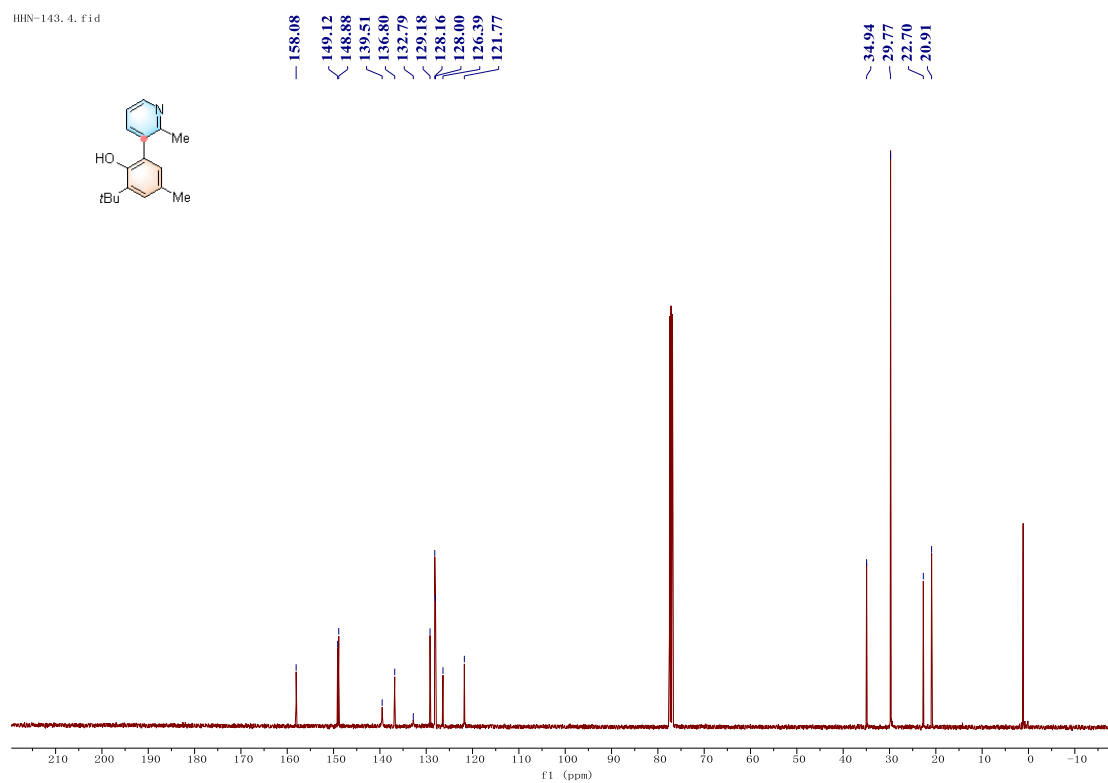

<sup>13</sup>C NMR spectrum of 4k



HN-150.1.fid

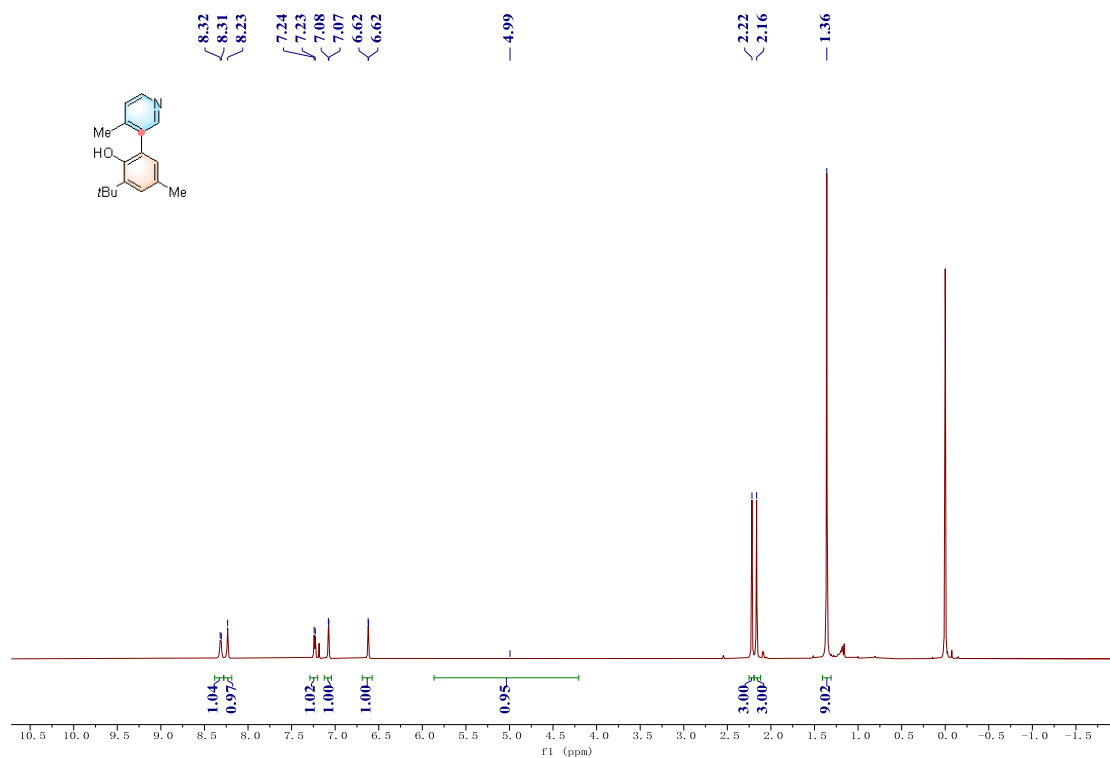

<sup>1</sup>H NMR spectrum of 4l

HN-150.2.fid

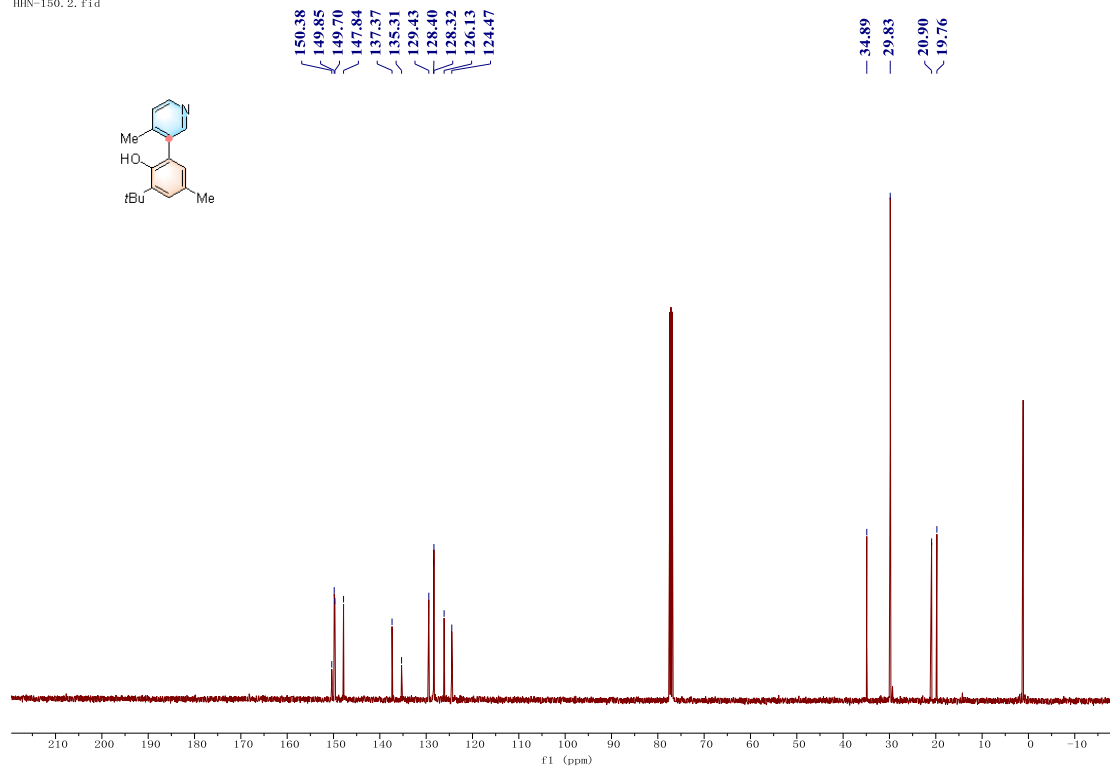

<sup>13</sup>C NMR spectrum of 4l

HN-149a. 4. fid

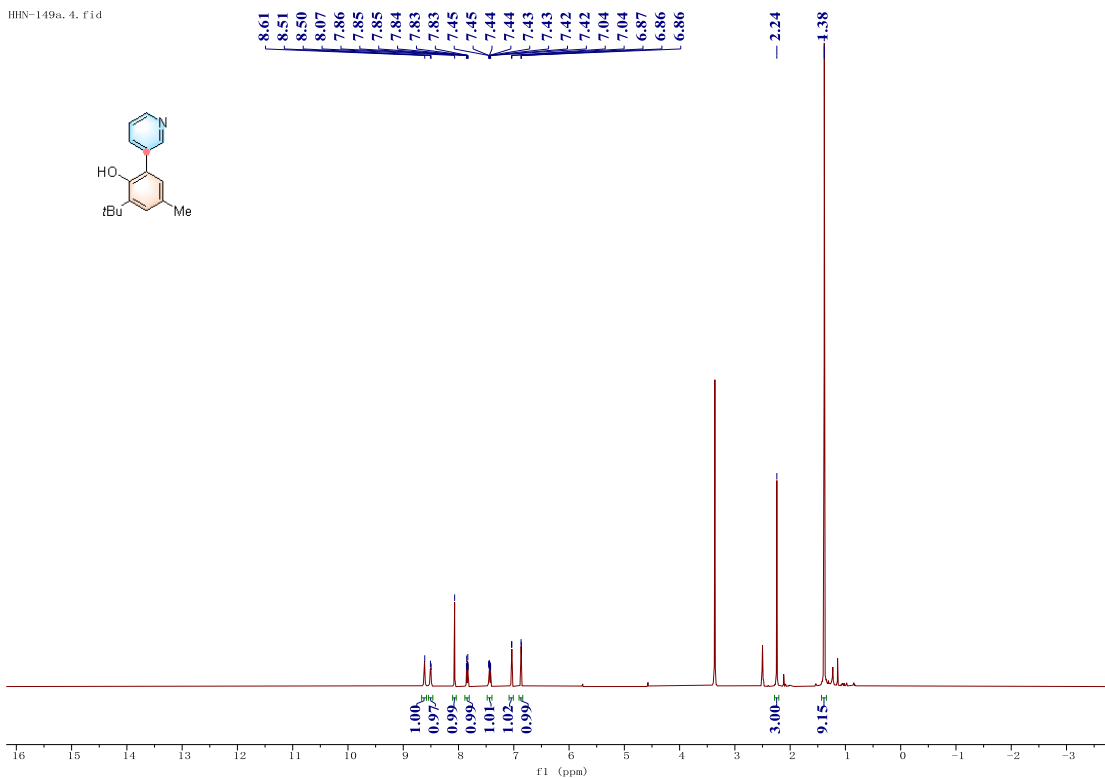

<sup>1</sup>H NMR spectrum of 4m

HN-149a. 5. fid

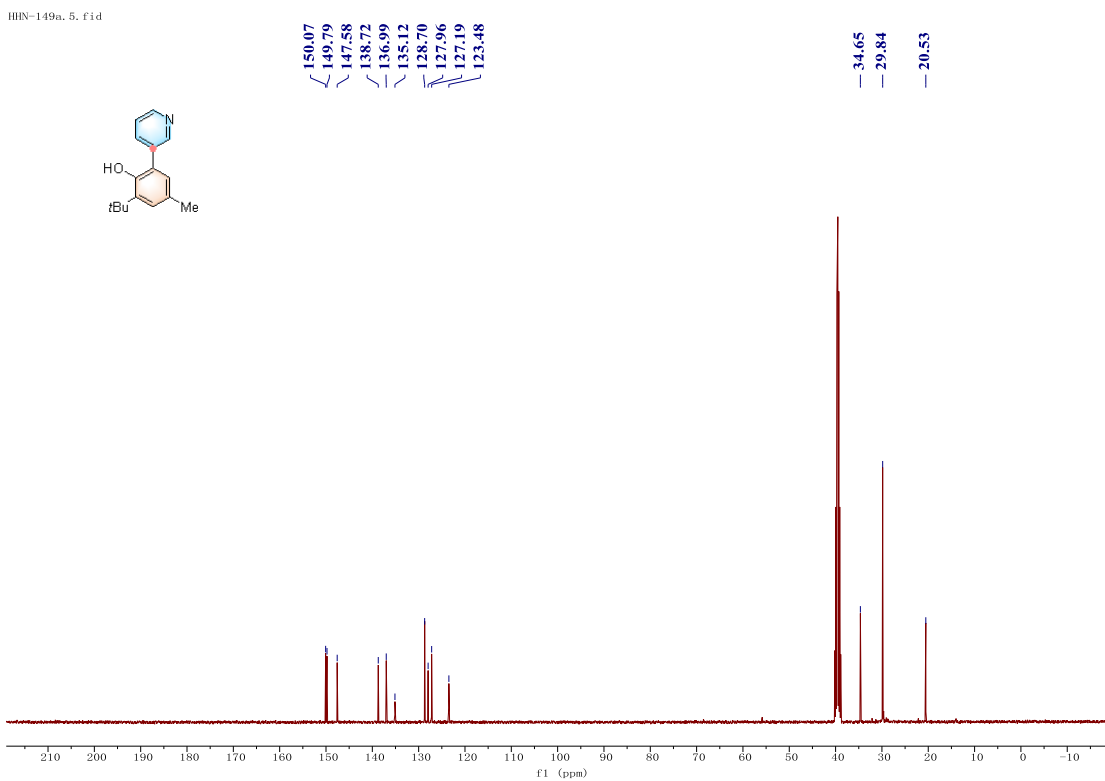

<sup>13</sup>C NMR spectrum of 4m

HN-142.1.fid

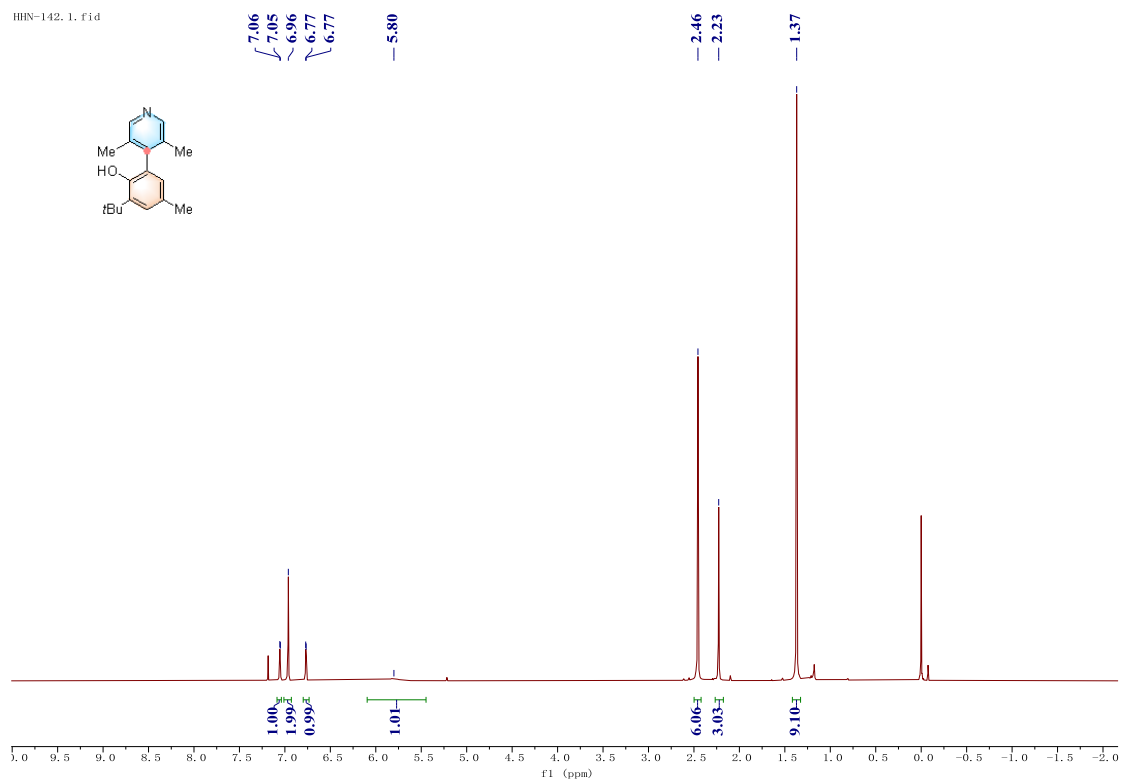

$^1\text{H}$  NMR spectrum of 4n

HN-142.2.fid

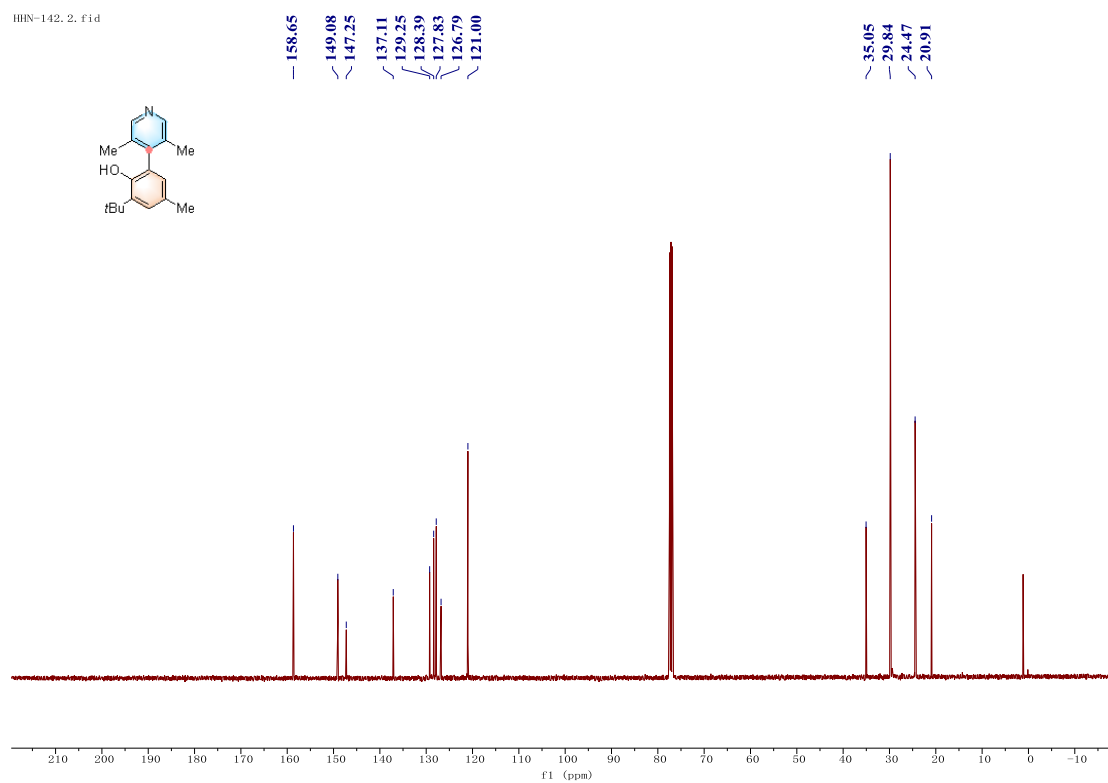

$^{13}\text{C}$  NMR spectrum of 4n

HN-155a. 1.fid

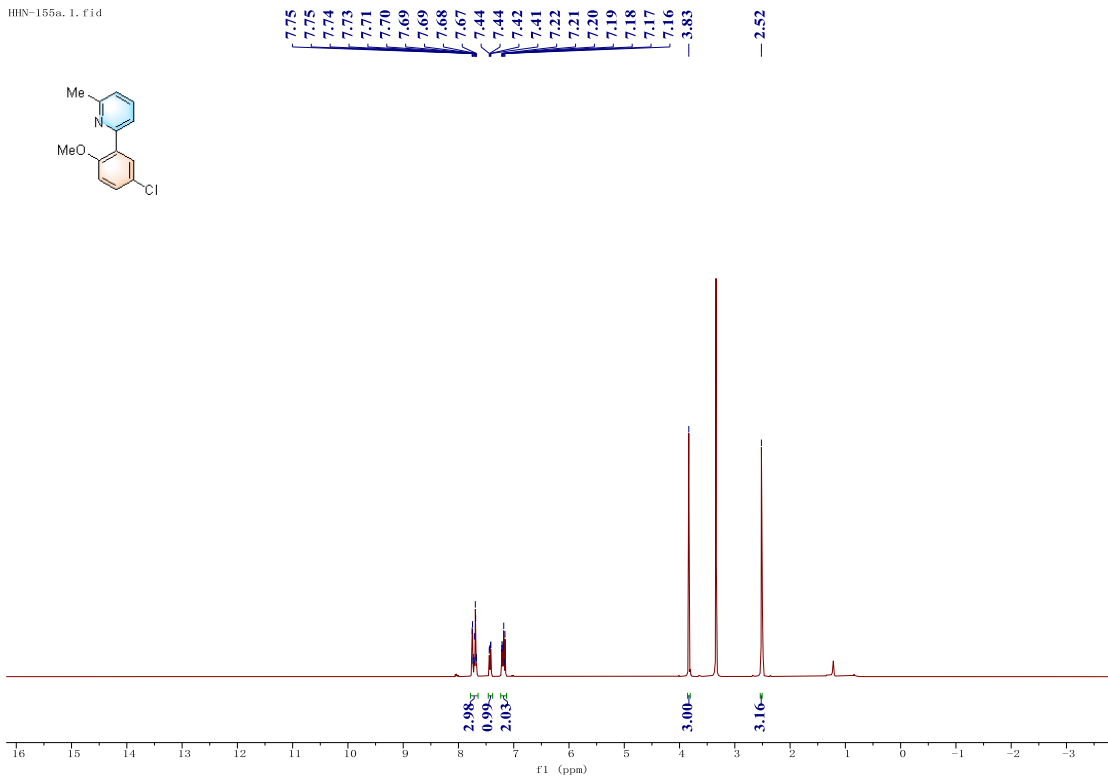

<sup>1</sup>H NMR spectrum of 6a

HN-155a. 2.fid

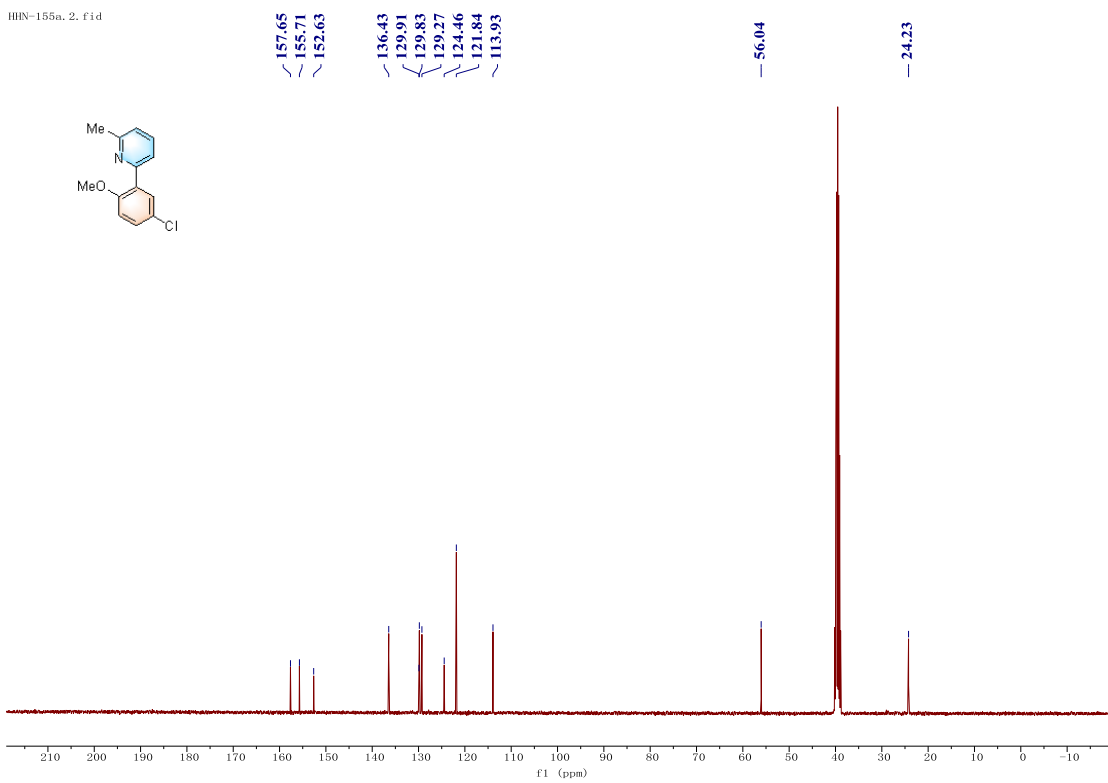

<sup>13</sup>C NMR spectrum of 6a

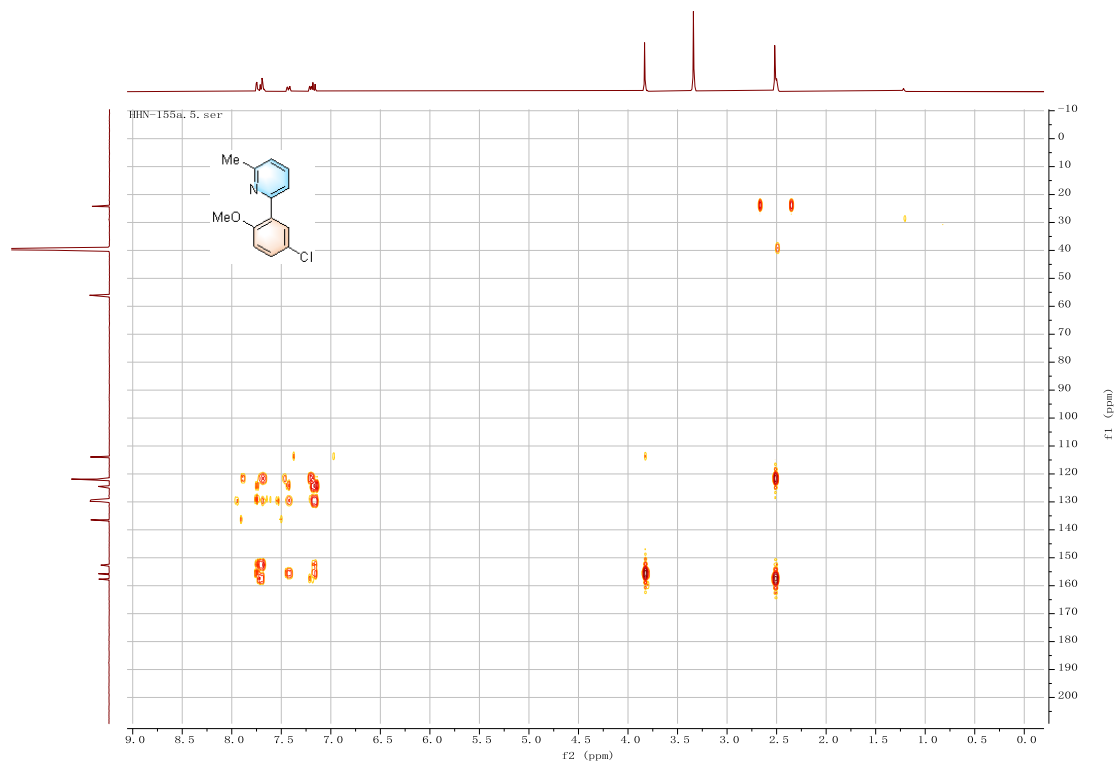

**HMBC spectrum of 6a**

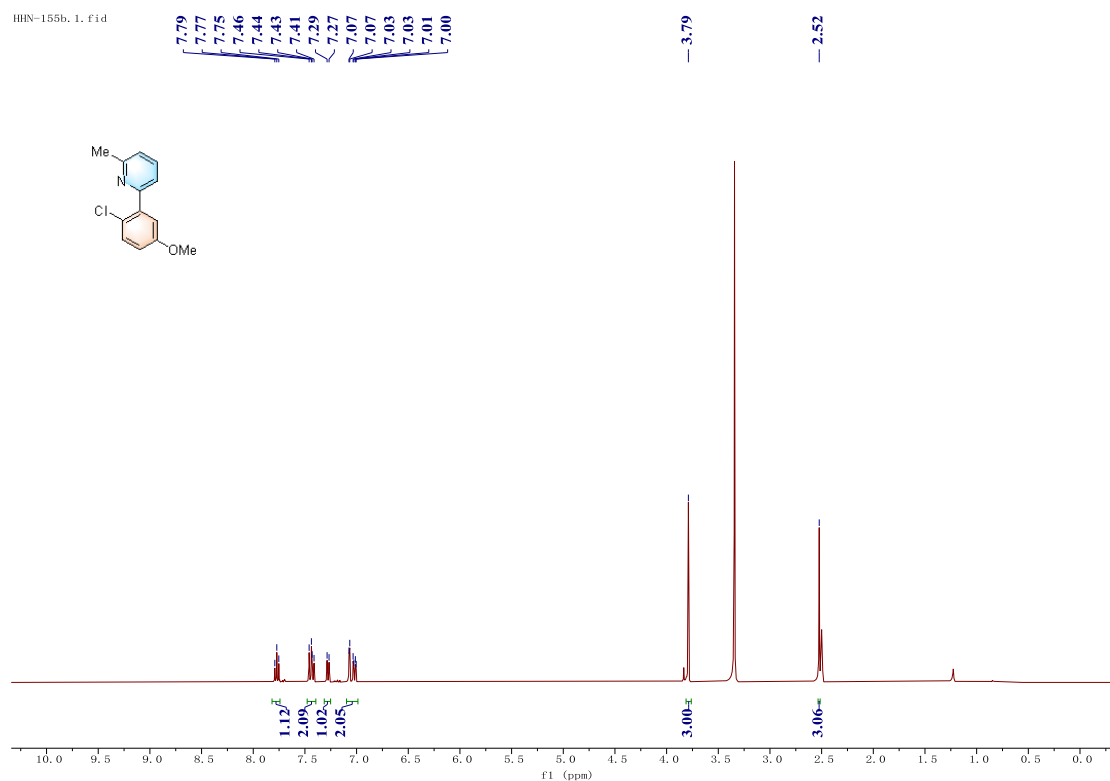

<sup>1</sup>H NMR spectrum of 6b

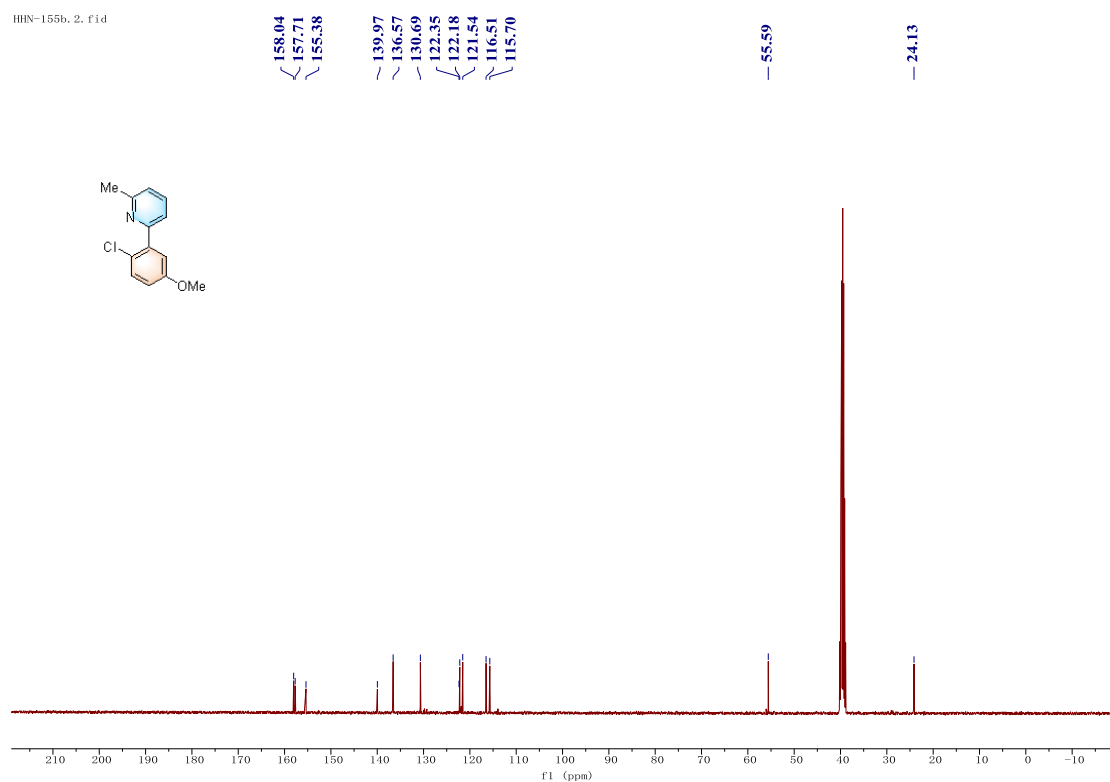

<sup>13</sup>C NMR spectrum of 6b

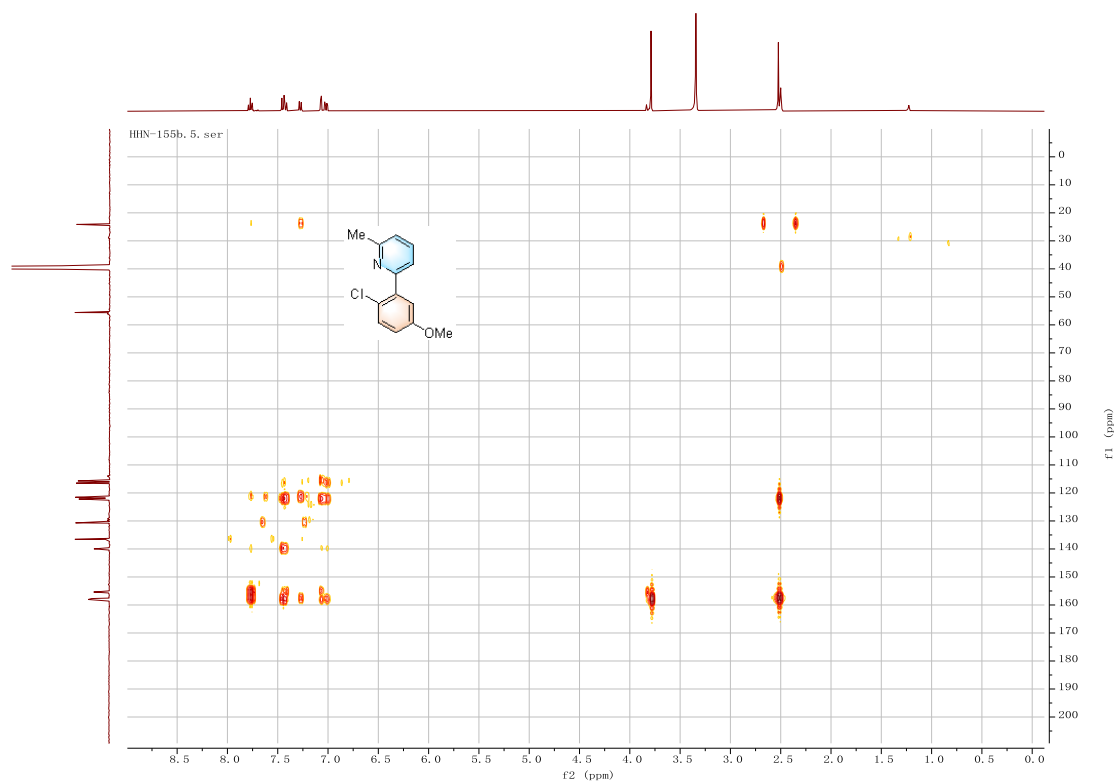

**HMBC spectrum of 6b**

HN-154b, 10, f1d

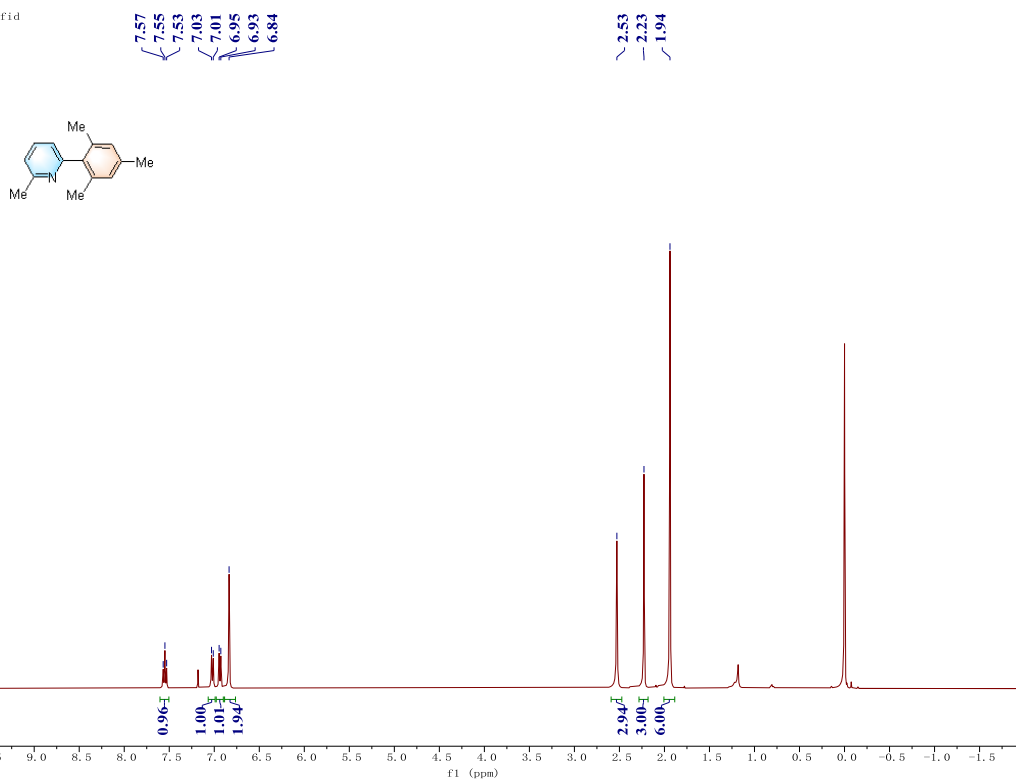

<sup>1</sup>H NMR spectrum of 8a

HN-154b, 11, f1d

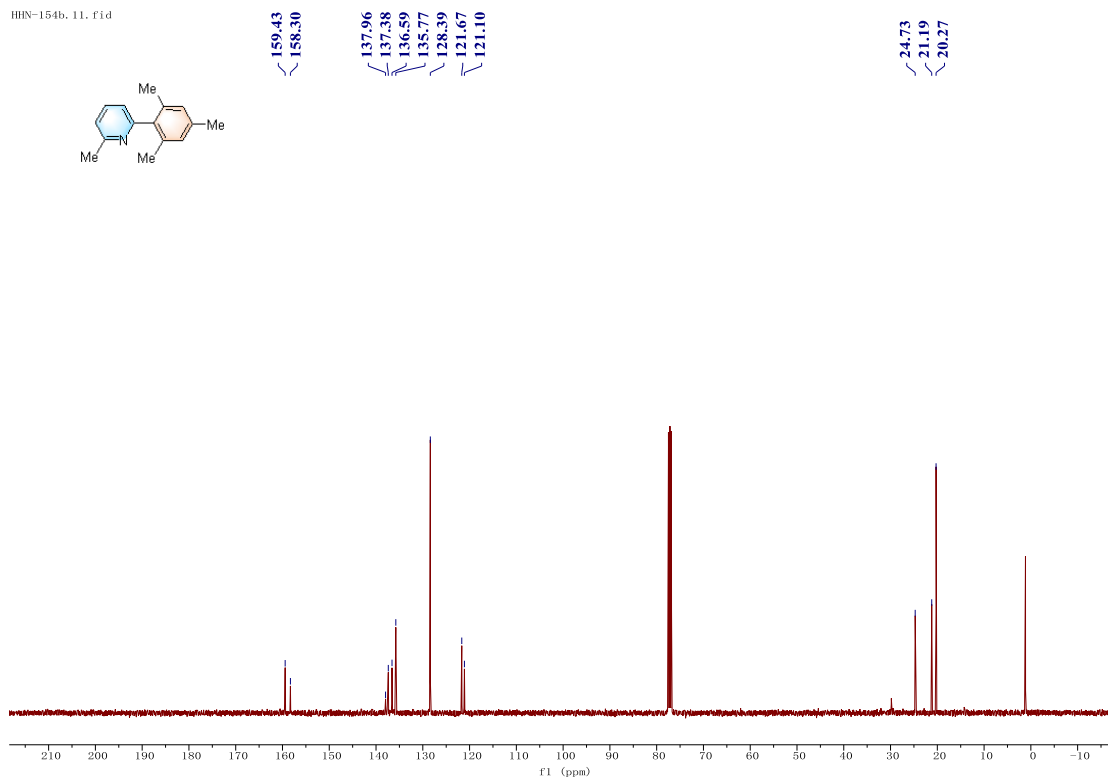

<sup>13</sup>C NMR spectrum of 8a



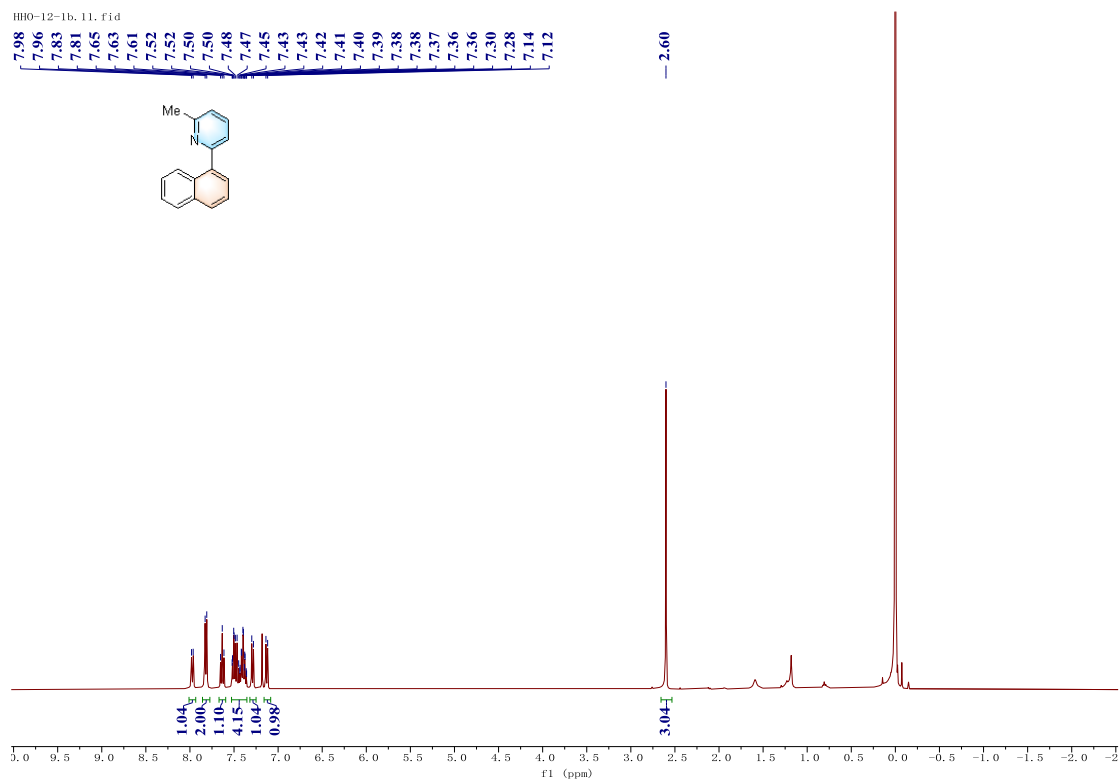

**<sup>1</sup>H NMR spectrum of 8b-1**

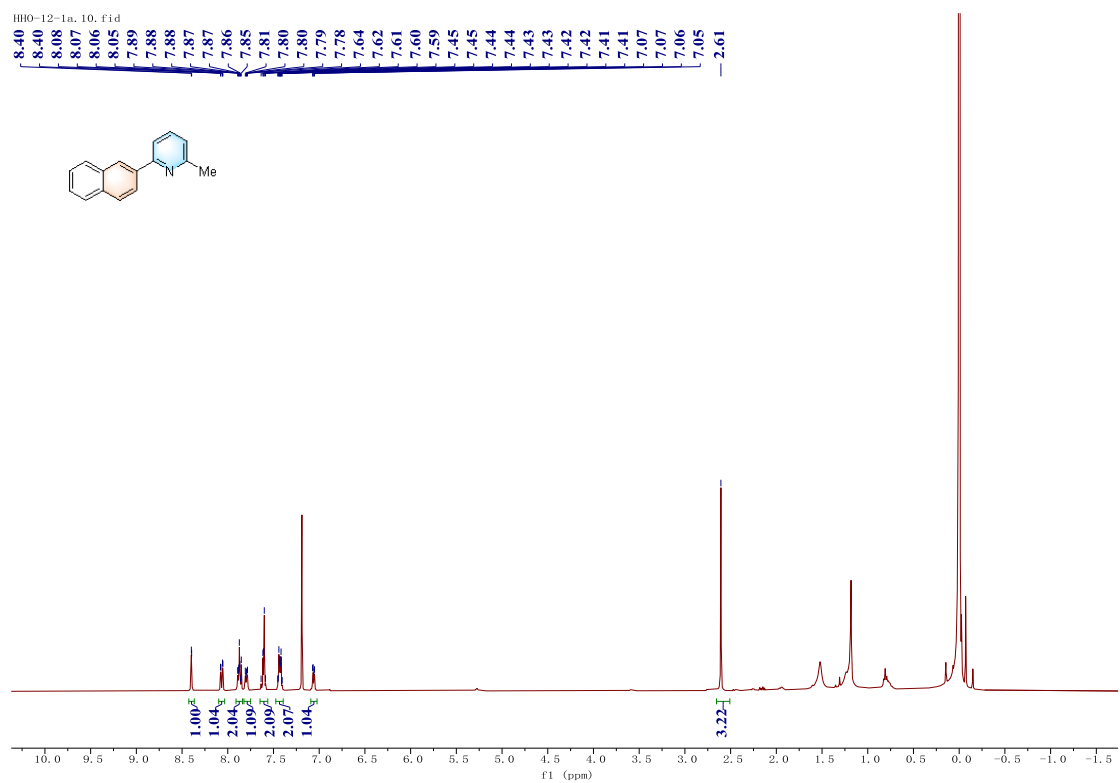

**<sup>1</sup>H NMR spectrum of 8b-2**
